# Supplementary material for: Genome-wide determinants of mortality and motor progression in Parkinson’s disease
Source: Springer Nature journal article supplement (doi:10.1038/s41531-024-00729-8), 2024-06-07
Supplement: MOESM1 [file 41531_2024_729_MOESM1_ESM.pdf]

# Genome-wide determinants of mortality and motor progression in Parkinson's disease: Supplementary Materials

## Table of Contents

|                                                                    |           |
|--------------------------------------------------------------------|-----------|
| <b>SUPPLEMENTARY METHODS</b> .....                                 | <b>2</b>  |
| <i>PD risk SNPs</i> .....                                          | 2         |
| <i>Meta-analysis with Iwaki et al. (2019) H&amp;Y3+ GWAS</i> ..... | 2         |
| <i>Slope-Hunter for collider bias</i> .....                        | 2         |
| <i>Mortality vs H&amp;Y3+</i> .....                                | 3         |
| <i>Progression to H&amp;Y4+ and H&amp;Y5</i> .....                 | 3         |
| <b>SUPPLEMENTARY FIGURES</b> .....                                 | <b>5</b>  |
| <i>Supplementary Figure 1</i> .....                                | 5         |
| <i>Supplementary Figure 2</i> .....                                | 6         |
| <i>Supplementary Figure 3</i> .....                                | 7         |
| <i>Supplementary Figure 4</i> .....                                | 8         |
| <i>Supplementary Figure 5</i> .....                                | 9         |
| <i>Supplementary Figure 6</i> .....                                | 10        |
| <i>Supplementary Figure 7</i> .....                                | 11        |
| <i>Supplementary Figure 8</i> .....                                | 12        |
| <i>Supplementary Figure 9</i> .....                                | 13        |
| <i>Supplementary Figure 10</i> .....                               | 14        |
| <i>Supplementary Figure 11</i> .....                               | 15        |
| <i>Supplementary Figure 12</i> .....                               | 16        |
| <i>Supplementary Figure 13</i> .....                               | 17        |
| <i>Supplementary Figure 14</i> .....                               | 18        |
| <i>Supplementary Figure 15</i> .....                               | 19        |
| <b>SUPPLEMENTARY TABLES</b> .....                                  | <b>20</b> |
| <i>Supplementary Table 1</i> .....                                 | 20        |
| <i>Supplementary Table 2</i> .....                                 | 21        |
| <i>Supplementary Table 3</i> .....                                 | 38        |
| <i>Supplementary Table 4</i> .....                                 | 56        |
| <i>Supplementary Table 5</i> .....                                 | 59        |
| <i>Supplementary Table 6</i> .....                                 | 60        |
| <i>Supplementary Table 7</i> .....                                 | 61        |
| <i>Supplementary Table 8</i> .....                                 | 62        |
| <i>Supplementary Table 9</i> .....                                 | 63        |
| <i>Supplementary Table 10</i> .....                                | 64        |
| <i>Supplementary Table 11</i> .....                                | 65        |
| <i>Supplementary Table 12</i> .....                                | 66        |
| <i>Supplementary Table 13</i> .....                                | 67        |
| <b>SUPPLEMENTARY DISCUSSION</b> .....                              | <b>68</b> |
| <i>Potential causal genes</i> .....                                | 68        |
| <b>SUPPLEMENTARY NOTES</b> .....                                   | <b>70</b> |
| <i>Software</i> .....                                              | 70        |
| <i>Public databases</i> .....                                      | 70        |
| <i>DIGPD study group</i> .....                                     | 71        |
| <i>AMP PD acknowledgements</i> .....                               | 72        |
| <i>AMP PD Cohort Acknowledgements</i> .....                        | 72        |
| <b>SUPPLEMENTARY REFERENCES</b> .....                              | <b>74</b> |

## SUPPLEMENTARY METHODS

### PD risk SNPs

As a sensitivity analysis for the candidate variant analysis, we also looked at other variants surrounding the top 90 PD risk SNPs<sup>1</sup>, which could potentially contribute via different mechanisms than the lead PD risk SNP. To do this, we conducted an additional sensitivity analysis where we looked at the results for the variants in the progression GWAS which were +/- 1Mb away from the 88 lead PD risk SNPs. We used the Benjamini-Hochberg, or False Discovery Rate (FDR), correction for multiple testing since the variants are in linkage disequilibrium and therefore not independent. Two loci passed the multiple testing threshold with FDR-adjusted p-value < 0.05. The first locus was within *SH3GL2*, with lead SNP rs12554329 associated with more rapid progression to PD mortality, p-value =  $1.5 \times 10^{-6}$ , and within 1Mb of two PD risk loci, rs10756907 and rs13294100. The second locus was within *SAMD4A* with lead SNP rs73273366, which was also associated with more rapid progression, p-value =  $7.4 \times 10^{-7}$ . This locus was near the PD risk locus rs11158026 which is within *GCH1* but spans several other candidate genes including *SAMD4A*. We also performed the same analysis with the H&Y3+ GWAS but there were no loci that passed correction for multiple testing.

### Meta-analysis with Iwaki et al. (2019) H&Y3+ GWAS

We performed a meta-analysis of our H&Y3+ summary statistics with the Iwaki et al.<sup>2</sup> H&Y3+ GWAS. There were some overlapping cohorts so we excluded these cohorts from our summary statistics: PPMI, DIGPD and Oslo. There were only 431,601 SNPs in the Iwaki summary statistics and 344,656 that were genotyped in more than 1000 individuals (likely due to the minor allele frequency filter > 5% and heterogeneity filtering), so there were only a small number of SNPs overlapping between both datasets.

After filtering for SNPs genotyped in > 1000 individuals, the top SNP was rs75614365 in *SORBS2*, p-value =  $2.12 \times 10^{-8}$ , however this variant was not present in the Iwaki summary statistics. It was only genotyped in Tracking Parkinson's and Oxford with a total sample size of 2,372. When we filtered for SNPs present in our data and the Iwaki summary statistics, only 300,498 SNPs were present. None of these reached genome-wide significance. The top SNP was rs115217673, which is the same as in our main H&Y3+ meta-analysis (in *MORN1*) but with larger p-value,  $2.72 \times 10^{-6}$ .

### Slope-Hunter for collider bias

We performed a sensitivity analysis to assess the impact of collider bias. This occurs when there is selection or conditioning of analysis on a subset of individuals. In a progression GWAS, this occurs because the analysis is just performed in individuals with disease, in our case PD. This can lead to biased estimates. Recently there have been several new methods proposed to estimate and adjust for collider bias, although these need to be more thoroughly validated as they are based on assumptions which cannot

usually be verified from the available data<sup>3</sup>. We used the Slope-Hunter method proposed by Mahmoud et al.<sup>4</sup>. This method aims to identify a set of SNPs which only affect disease risk and not progression, and use this set of SNPs to estimate a 'correction factor' which other variant estimates are then adjusted by. In our sensitivity analysis for the mortality GWAS, the adjustment factor estimated using the Slope-Hunter method was 0.320 (95% CI 0.071 to 0.568, based on a standard error of 0.127 using 100 bootstrap samples). The positive adjustment factor suggests that there are common causes of PD risk and PD mortality with discordant net directions of effect. The top 10 SNPs from the SlopeHunter method are reported in [Supplementary Table 11](#). Random pruning is performed to avoid bias from the winner's curse, so the selected SNPs are not exactly the same as the progression GWAS hits. Some effect estimates were adjusted up and others were adjusted down however they were overall very similar.

Interestingly, we note that the variant rs3574901, tagging *GBA1* p.E326K, was no longer significantly associated with mortality after adjustment with the SlopeHunter method. The variant was nominally associated with mortality in unadjusted analysis (beta = 0.40, SE = 0.11,  $p = 3.6 \times 10^{-4}$ ) however in the adjusted estimates the effect was no longer significant (beta = 0.16, SE = 0.15,  $p = 0.29$ ). This is an interesting finding which suggests that collider bias may be influencing the results of *GBA1* variants on progression, however this needs to be investigated in other studies.

We also looked at the top 10 mortality SNPs and whether they were associated with age at onset. These results are shown in [Supplementary Table 12](#). Overall the results for the top mortality SNPs were similar even when age at onset was not included as a covariate in the Cox proportional hazards models, although the p-values were slightly larger. The top 10 SNPs were also not associated with age at onset directly in linear models, adjusting for sex and PC1-PC5.

### **Mortality vs H&Y3+**

To investigate whether the genetic loci underlying progression to mortality and H&Y3+ were similar, we performed a sensitivity analysis by conducting the GWASs using just the four cohorts that had both mortality and Hoehn and Yahr data available. We found that the top signals were not shared between the two GWASs ([Supplementary Figure 14](#)). Though underpowered, this analysis suggests that the genetic signals underlying progression to mortality and H&Y3+ are largely distinct, although further analysis in larger samples is needed. We also looked at the top mortality SNPs and checked their p-values in the H&Y3+ GWAS, and none were significant except for the *APOE* variant ( $p = 0.037$ ) ([Supplementary Table 6](#)).

### **Progression to H&Y4+ and H&Y5**

As a sensitivity analysis, we analysed the top SNPs from the H&Y3+ GWAS and looked at their associations with progression to H&Y stage 4 or greater, and H&Y stage 5. The ability to analyse H&Y stage 4 (severely disabling disease) and greater is limited by

subject drop out as at this point many subjects will not attend for follow-up research visits. We assessed the top 4 SNPs in the motor progression GWAS against time to H&Y4+ and H&Y5 in each cohort individually and then performed a random-effects meta-analysis. Some of the individual cohort estimates were very imprecise (very large estimates with very wide confidence intervals and large standard error). With rarer variants the Cox proportional hazard models in the individual cohort can be unreliable, and also the random-effects meta-analysis across cohorts were not able to obtain stable results because of the large variance between studies. The results are reported in Supplementary Table 13.

## SUPPLEMENTARY FIGURES

**Supplementary Figure 1.** Kaplan-Meier curve for mortality stratified by cohort. Only cohorts included in the mortality GWAS are shown.

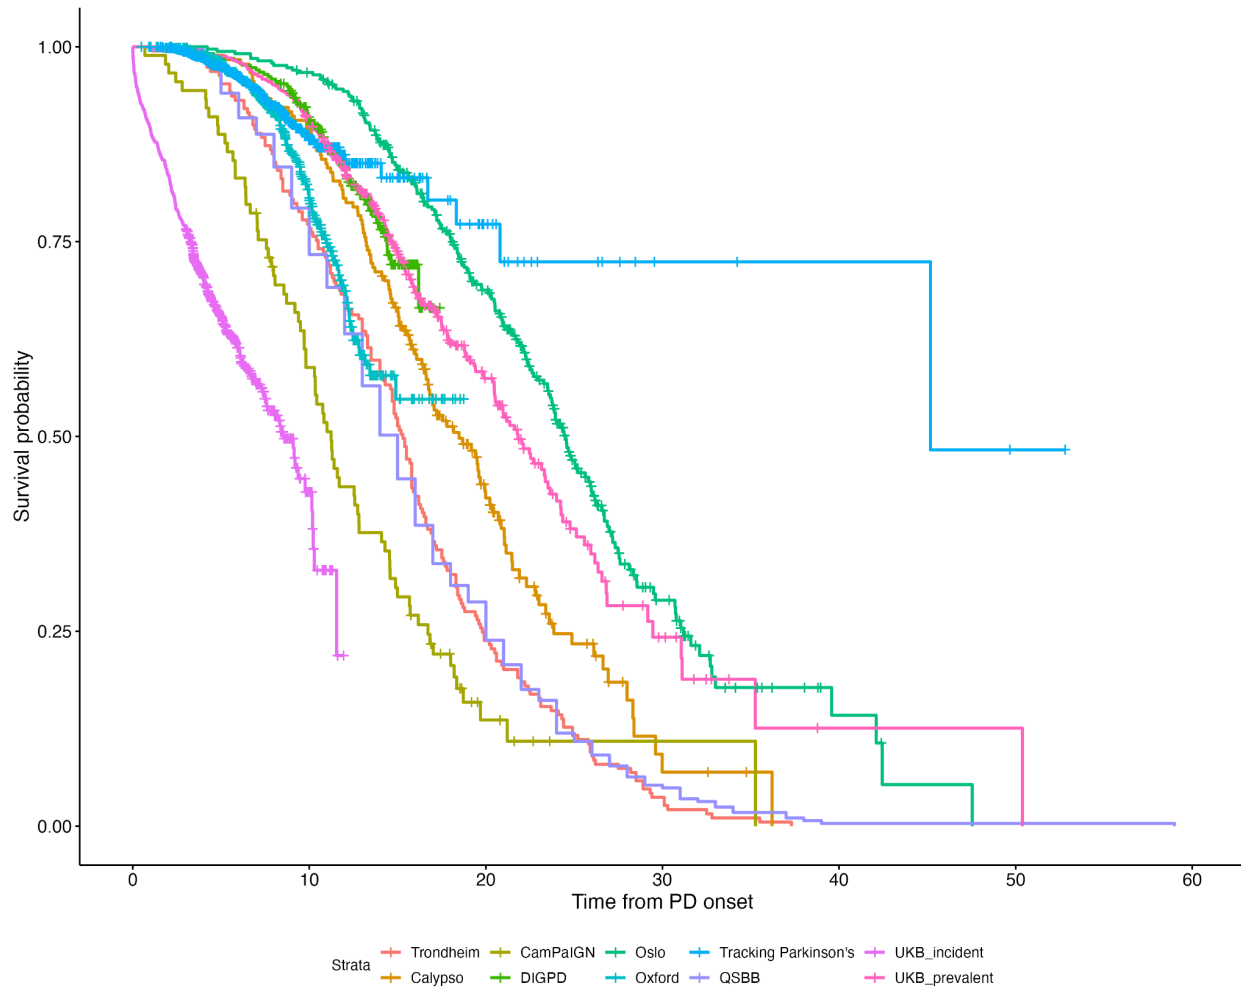

Time from PD onset is shown in years. Vertical lines indicate censoring.

**Supplementary Figure 2.** LocusZoom plot for rs429358 in mortality GWAS in Chromosome 19.

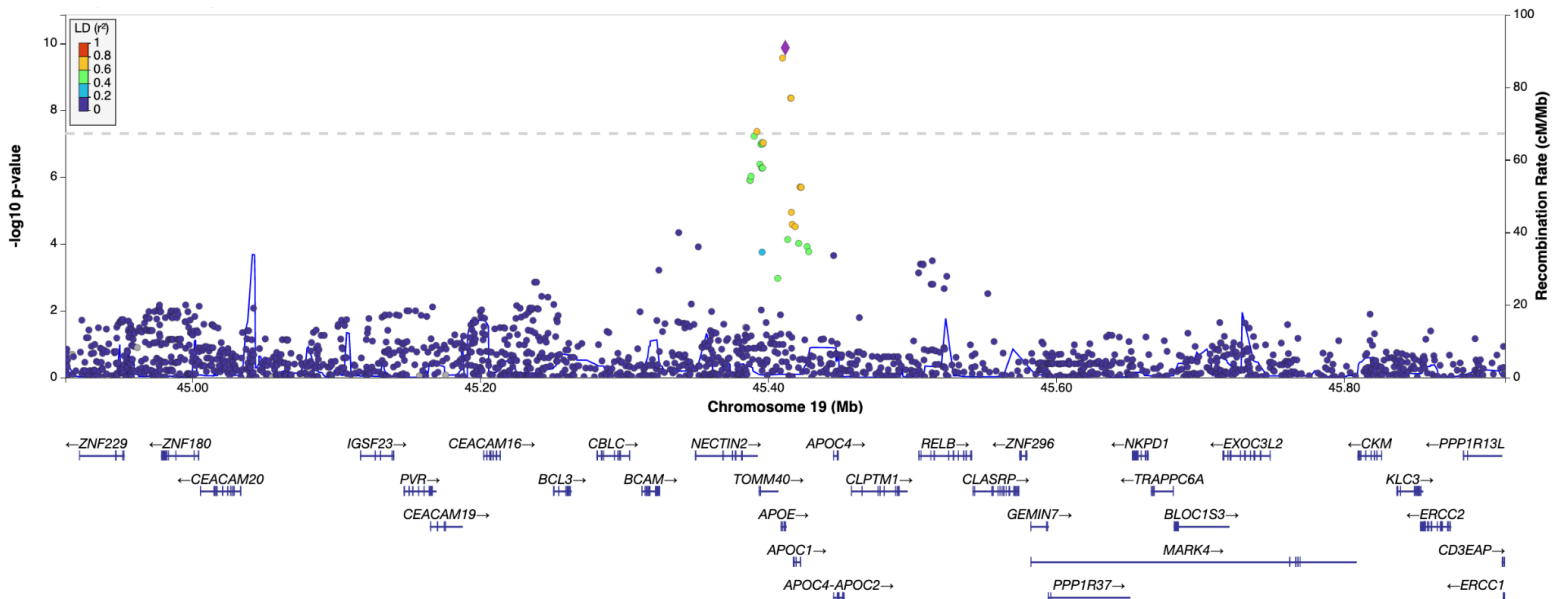

Data is shown in hg37 build. The purple diamond shows the most significantly associated Single Nucleotide Polymorphism (SNP) in the locus. SNPs in linkage disequilibrium (LD) with the index SNP are shown in coloured circles according to the  $r^2$ , as shown in the legend on the top left. The recombination rate is shown as the blue line with the axis on the right y axis. Genes are shown in the bottom panel with the positions of exons displayed as bars, and transcribed strand indicated with an arrow.

**Supplementary Figure 3.** LocusZoom plot for rs4726467 in mortality GWAS in Chromosome 7.

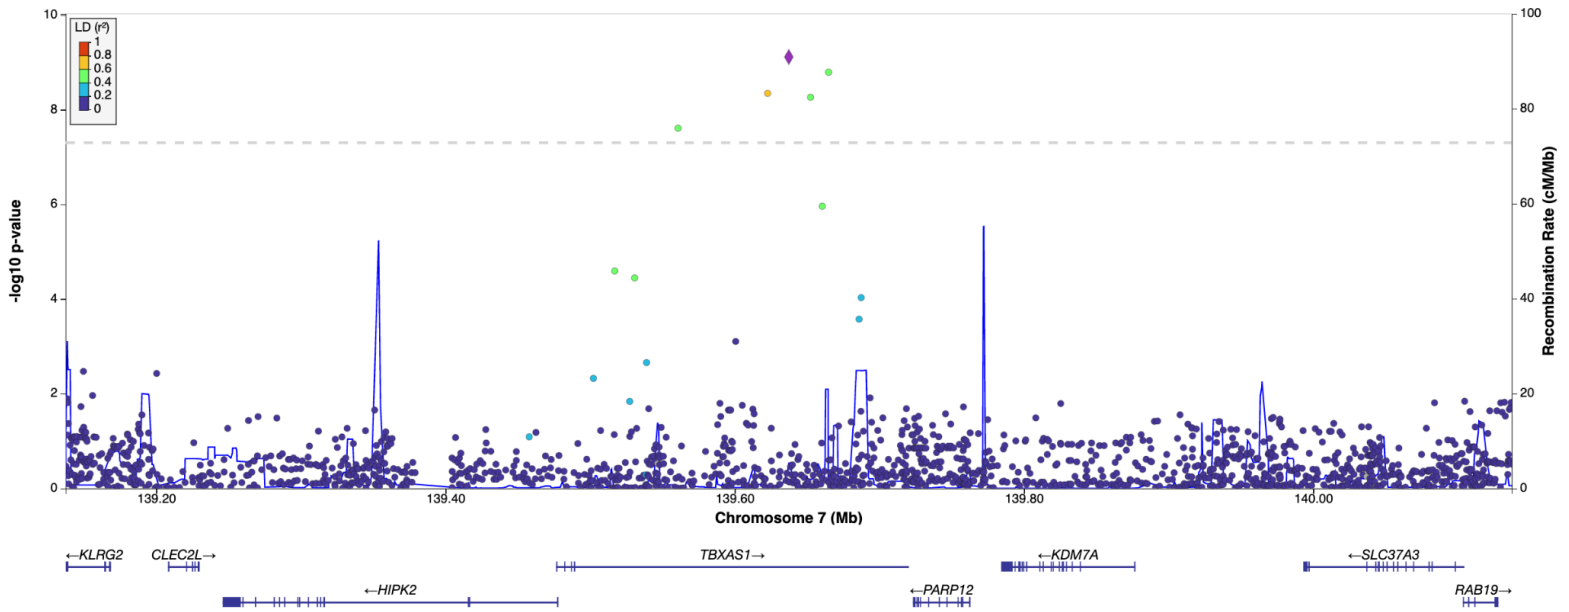

Data is shown in hg37 build. The purple diamond shows the most significantly associated Single Nucleotide Polymorphism (SNP) in the locus. SNPs in linkage disequilibrium (LD) with the index SNP are shown in coloured circles according to the  $r^2$ , as shown in the legend on the top left. The recombination rate is shown as the blue line with the axis on the right y axis. Genes are shown in the bottom panel with the positions of exons displayed as bars, and transcribed strand indicated with an arrow.

**Supplementary Figure 4.** LocusZoom plot for rs10437796 in mortality GWAS in Chromosome 12.

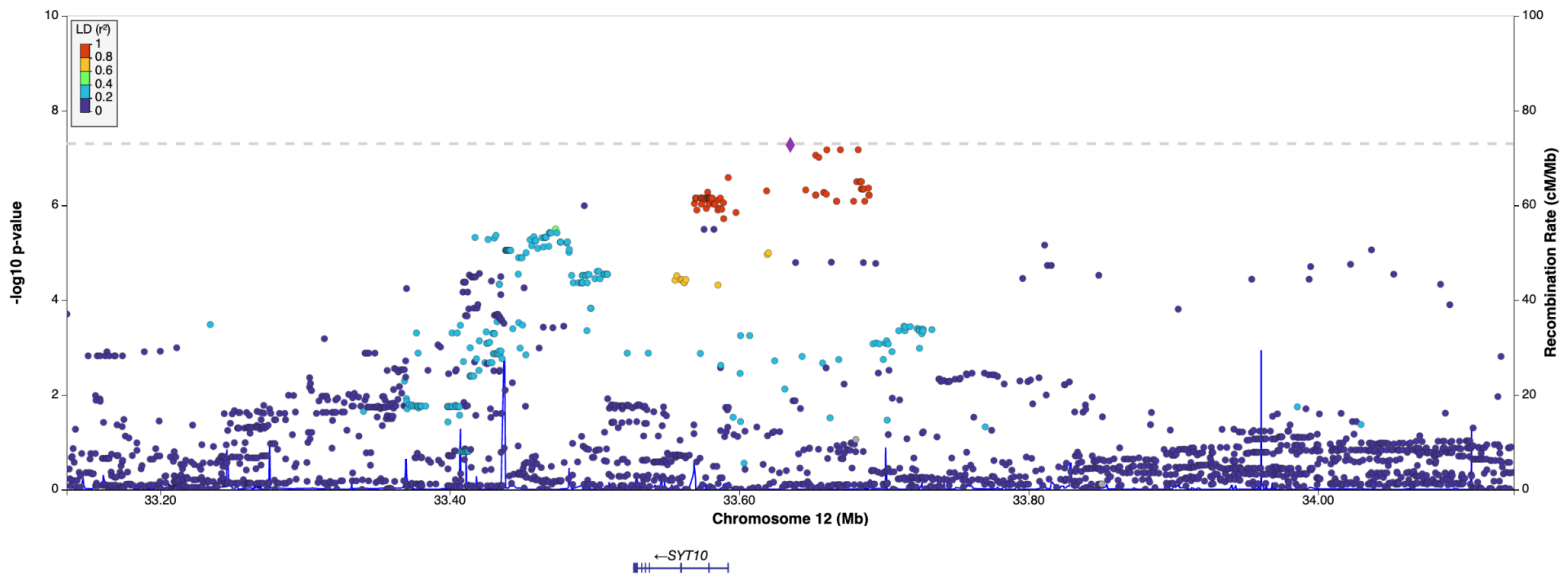

Data is shown in hg37 build. The purple diamond shows the most significantly associated Single Nucleotide Polymorphism (SNP) in the locus. SNPs in linkage disequilibrium (LD) with the index SNP are shown in coloured circles according to the  $r^2$ , as shown in the legend on the top left. The recombination rate is shown as the blue line with the axis on the right y axis. Genes are shown in the bottom panel with the positions of exons displayed as bars, and transcribed strand indicated with an arrow.



**Supplementary Figure 5.** Kaplan-Meier curve for H&Y3 stratified by cohort. Only cohorts included in the H&Y3 GWAS are shown.

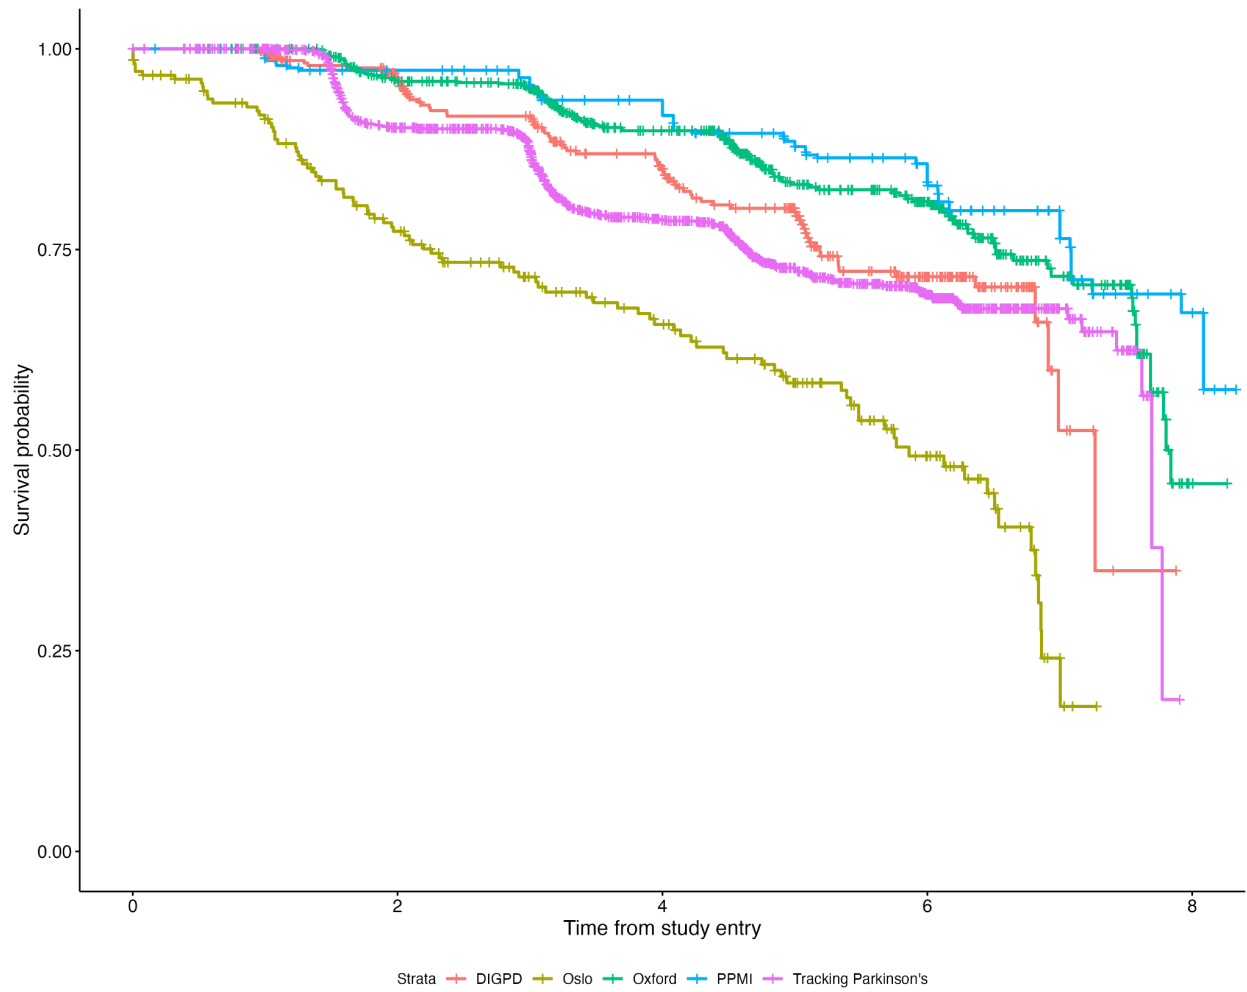

Time from study entry is shown in years. Vertical lines indicate censoring.

**Supplementary Figure 6.** LocusZoom plot for rs115217673 in H&Y3+ GWAS in Chromosome 1.

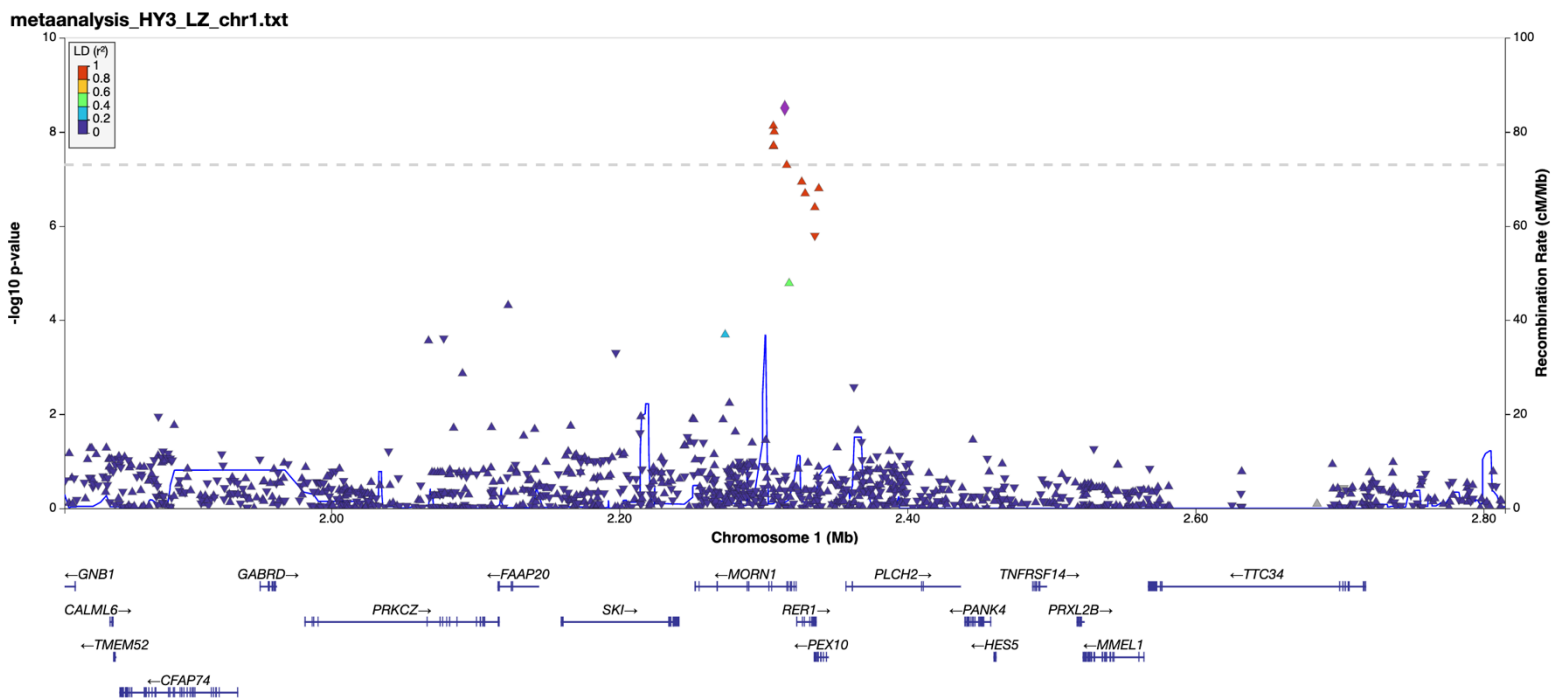

Data is shown in hg37 build. The purple diamond shows the most significantly associated Single Nucleotide Polymorphism (SNP) in the locus. SNPs in linkage disequilibrium (LD) with the index SNP are shown in coloured circles/triangles according to the  $r^2$ , as shown in the legend on the top left. The recombination rate is shown as the blue line with the axis on the right y axis. Genes are shown in the bottom panel with the positions of exons displayed as bars, and transcribed strand indicated with an arrow.

**Supplementary Figure 7.** LocusZoom plot for rs141421624 in H&Y3+ GWAS in Chromosome 2.

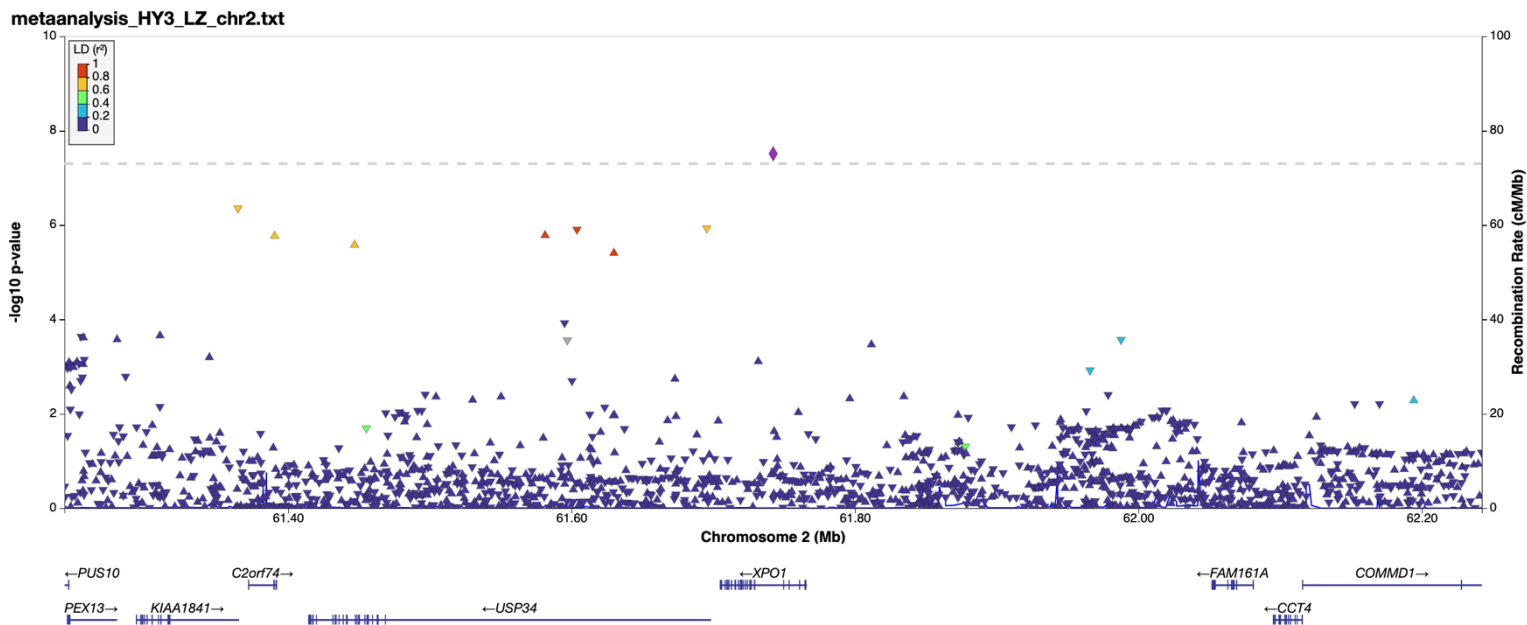

Data is shown in hg37 build. The purple diamond shows the most significantly associated Single Nucleotide Polymorphism (SNP) in the locus. SNPs in linkage disequilibrium (LD) with the index SNP are shown in coloured circles/triangles according to the  $r^2$ , as shown in the legend on the top left. The recombination rate is shown as the blue line with the axis on the right y axis. Genes are shown in the bottom panel with the positions of exons displayed as bars, and transcribed strand indicated with an arrow.

**Supplementary Figure 8.** LocusZoom plot for rs113120976 in H&Y3+ GWAS in Chromosome 4.

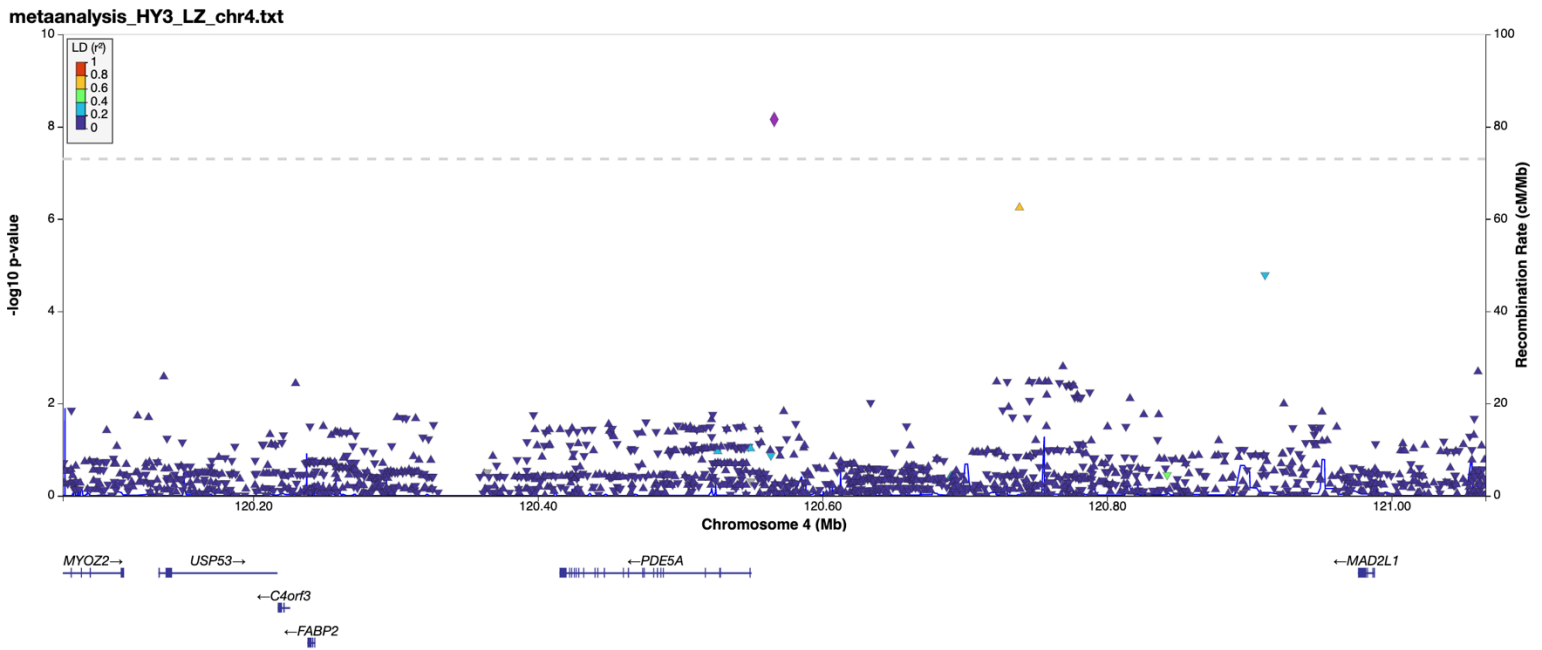

Data is shown in hg37 build. The purple diamond shows the most significantly associated Single Nucleotide Polymorphism (SNP) in the locus. SNPs in linkage disequilibrium (LD) with the index SNP are shown in coloured circles/triangles according to the  $r^2$ , as shown in the legend on the top left. The recombination rate is shown as the blue line with the axis on the right y axis. Genes are shown in the bottom panel with the positions of exons displayed as bars, and transcribed strand indicated with an arrow.

**Supplementary Figure 9.** LocusZoom plot for rs145274312 in H&Y3+ GWAS in Chromosome 7.

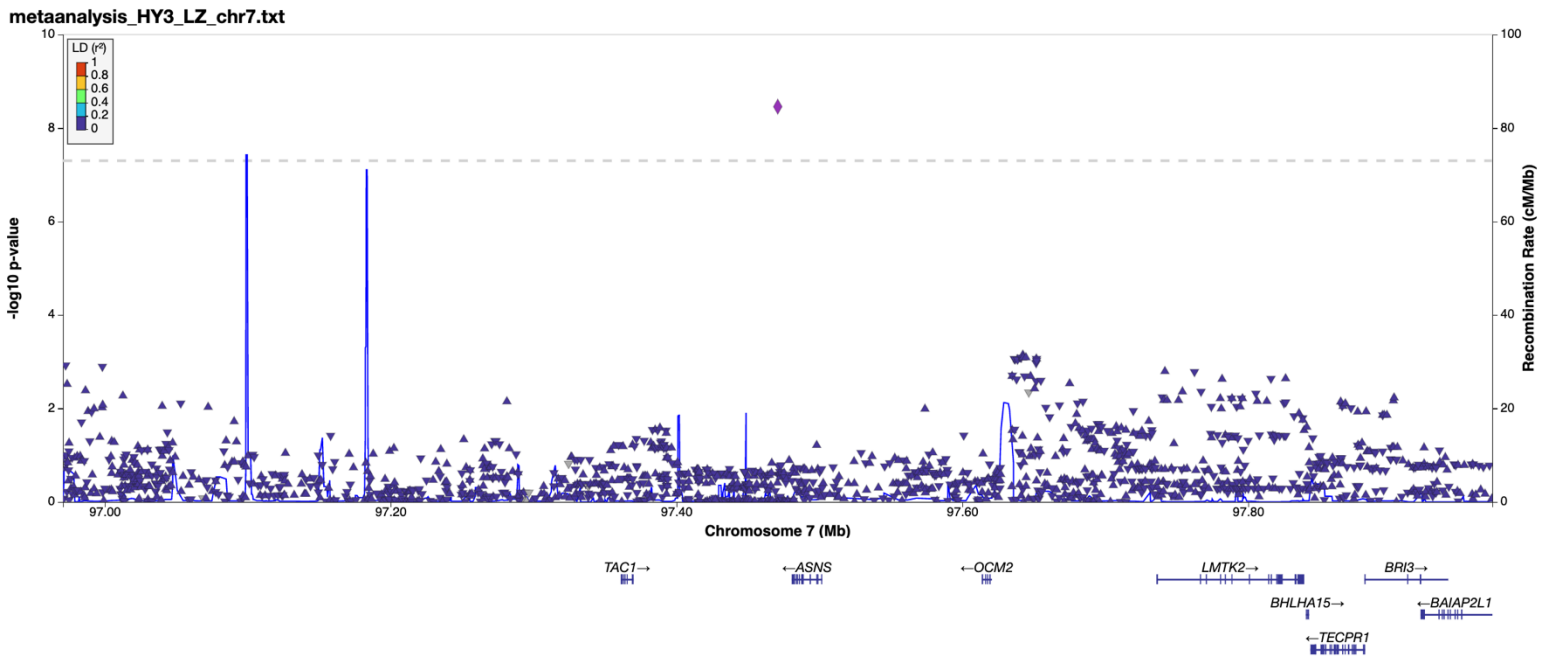

Data is shown in hg37 build. The purple diamond shows the most significantly associated Single Nucleotide Polymorphism (SNP) in the locus. SNPs in linkage disequilibrium (LD) with the index SNP are shown in coloured circles/triangles according to the  $r^2$ , as shown in the legend on the top left. The recombination rate is shown as the blue line with the axis on the right y axis. Genes are shown in the bottom panel with the positions of exons displayed as bars, and transcribed strand indicated with an arrow.

**Supplementary Figure 10.** Regional association plot for eQTL (derived from PsychENCODE) and PD H&Y3 GWAS colocalizations in the region surrounding *PUS10*.

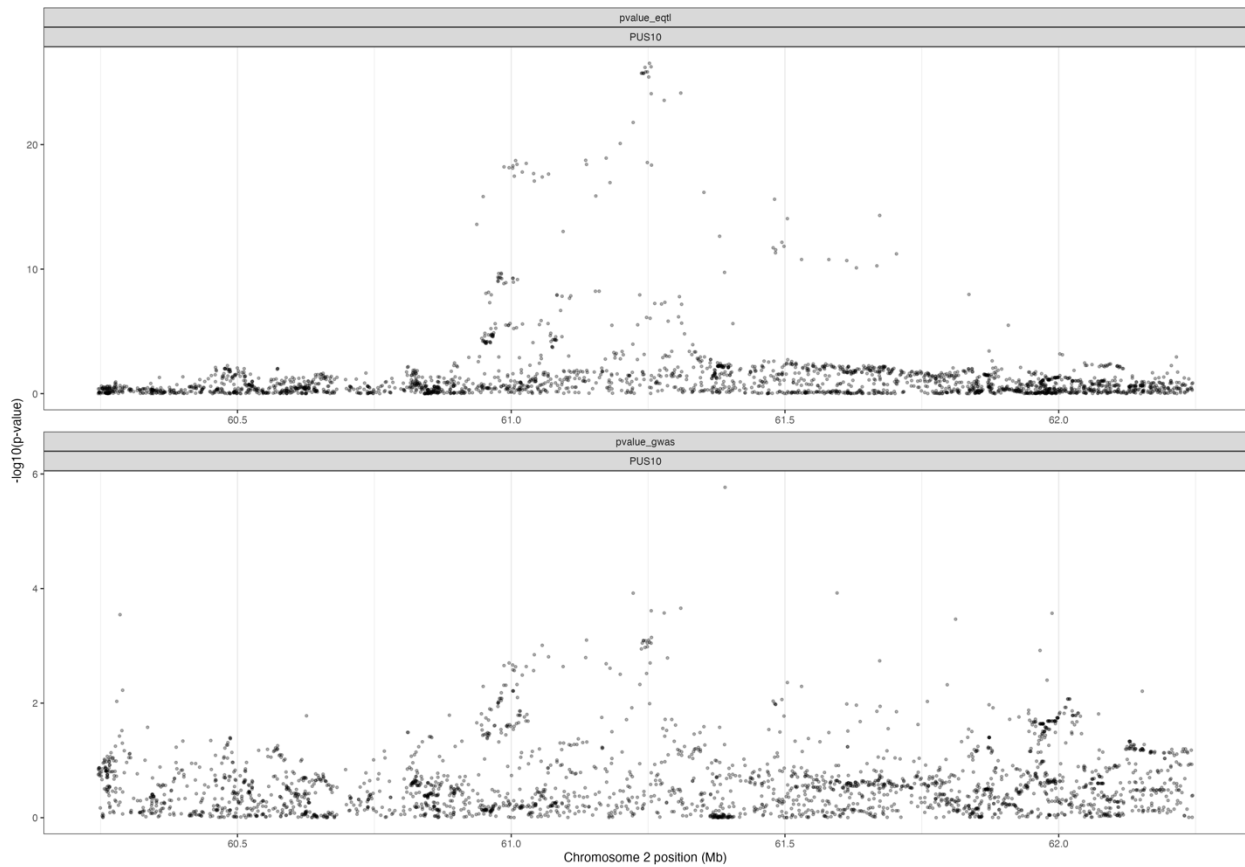

Regional association plot for eQTL and PD H&Y3 GWAS colocalization in the region surrounding *PUS10*. The regional association plot for eQTL are shown in the upper pane, and the PD H&Y3 GWAS association signals are shown in the lower pane. eQTLs were derived from the PsychENCODE, where adult brain tissue from 1,387 individuals was analysed. The PP.H4 (the posterior probability that there is an association in the region with trait 1 and trait 2, with one shared SNP) for *PUS10* was 0.698. The x-axis denotes chromosomal position in hg19, and the y-axis indicates association p-values on a -log10 scale.

**Supplementary Figure 11.** Heatmap showing the PD GWAS risk loci from Nalls et al. (2019) that were associated ( $p < 0.05$ ) with mortality, or H&Y stage 3+. Only variants with at least one association  $p < 0.05$  are shown in the heatmap.

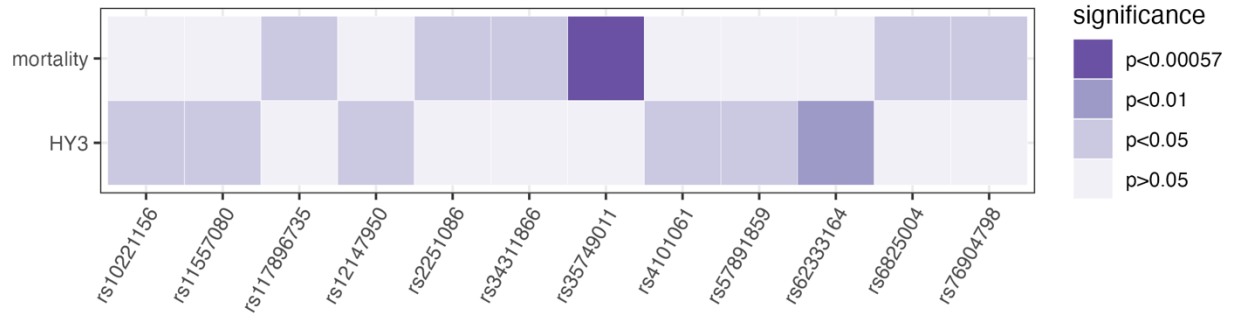

**Supplementary Figure 12.** Power calculations for mortality GWAS with  $N = 5,744$  at different effect sizes, allele frequencies, and event rates (shown in faceted plots with grey bars). Calculated using the R package 'survSNP'.

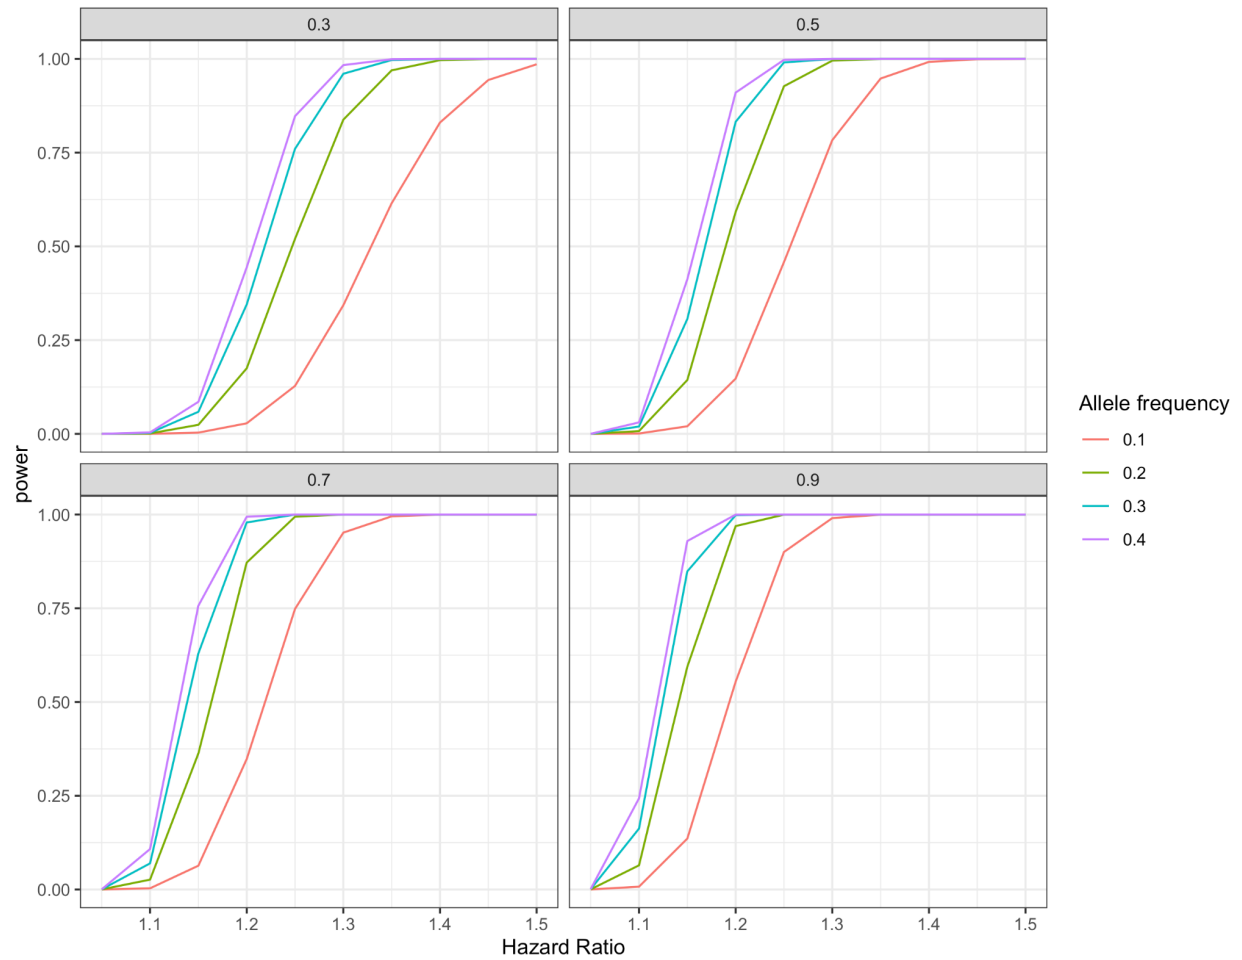



**Supplementary Figure 13.** Power calculations for H&Y3+ GWAS with  $N = 3,331$  at different effect sizes, allele frequencies, and event rates (shown in faceted plots with grey bars). Calculated using the R package 'survSNP'.

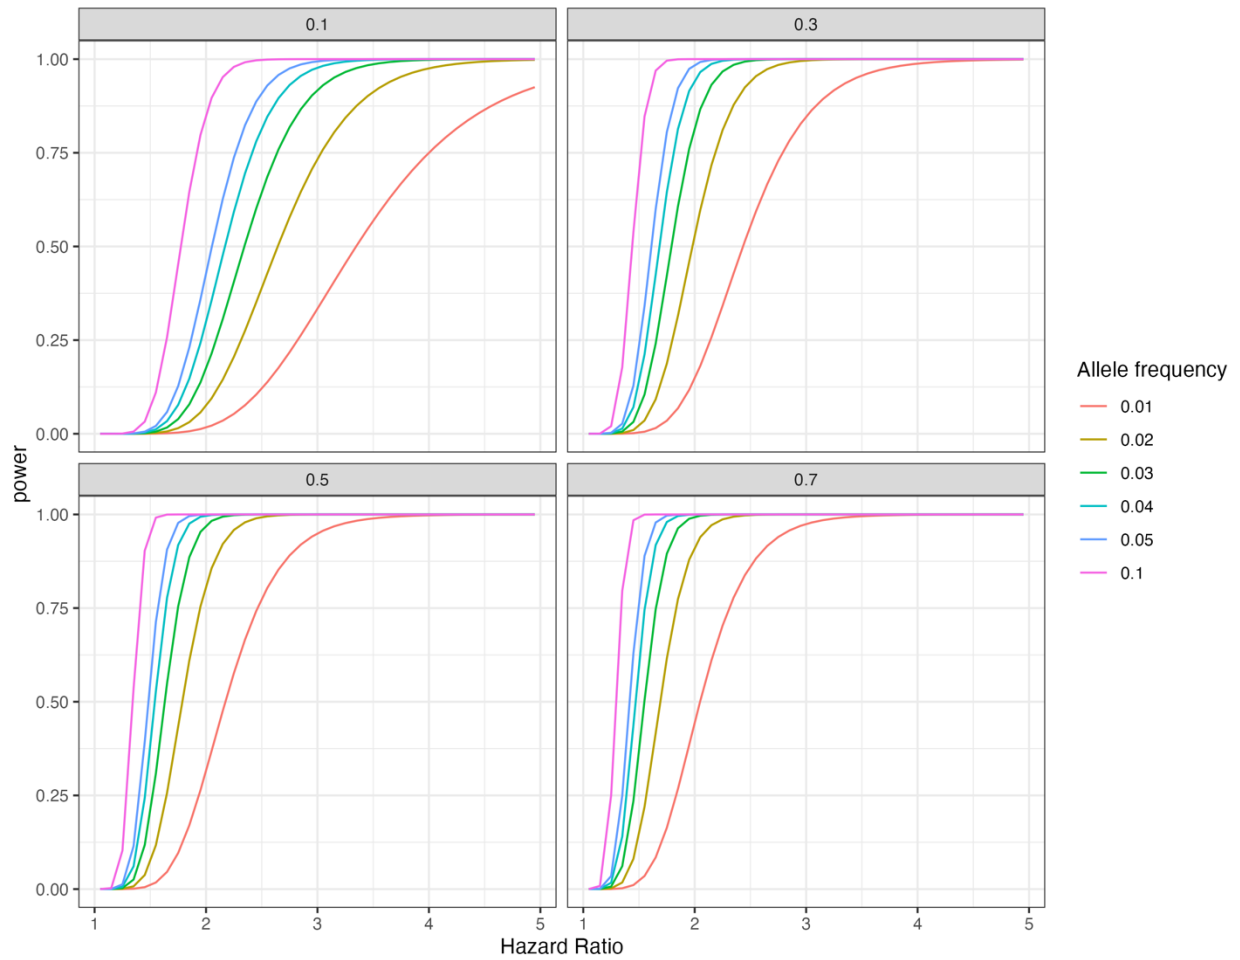

**Supplementary Figure 14.** Miami plot of mortality GWAS (top) and Hoehn and Yahr stage 3+ GWAS (bottom) in only cohorts that have both outcomes.

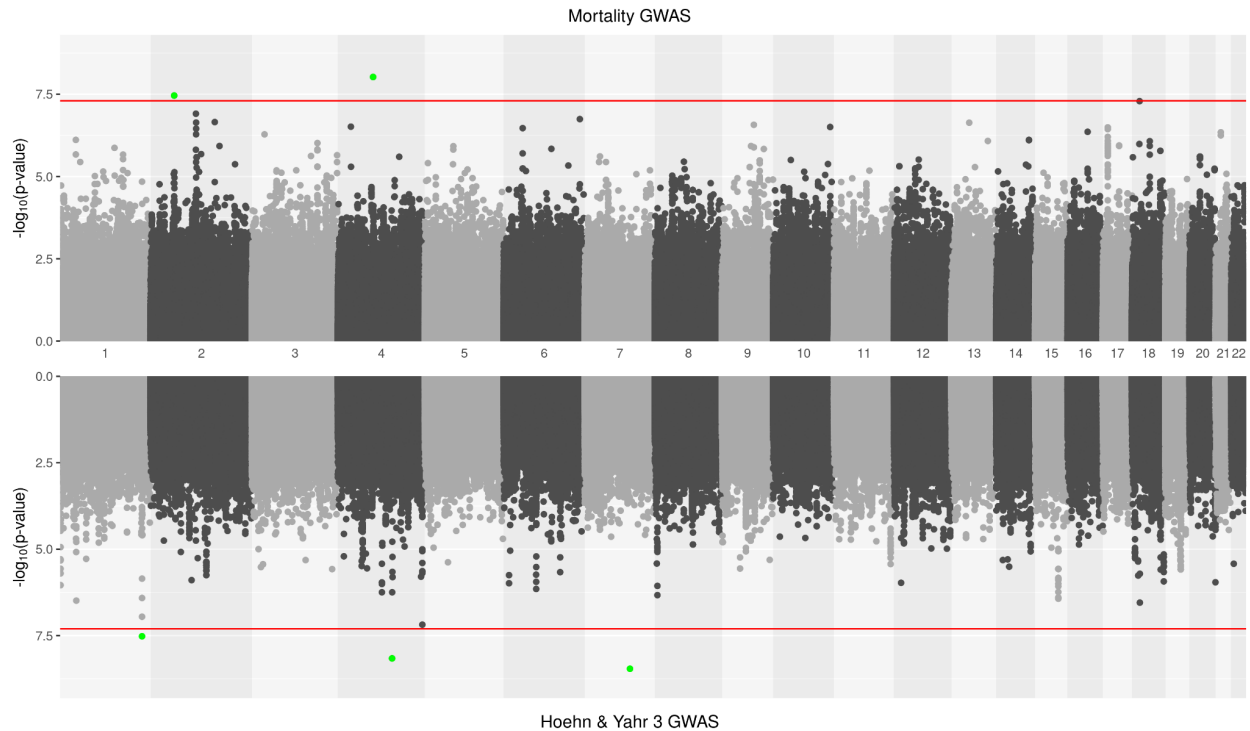

The GWASs were performed only in the four cohorts that had both outcomes available: Tracking Parkinson's, Oxford Discovery, DIGPD, and Oslo. The red line indicates the  $-\log_{10} p$  value genome-wide significant threshold of  $p = 5 \times 10^{-8}$ . The green dots indicate variants passing genome-wide significance. Overall there does not appear to be shared signals between the mortality GWAS and Hoehn and Yahr stage 3+ GWAS, as the green highlighted signals are not shared/present in both GWASs.

GWAS = Genome Wide Association Study.

**Supplementary Figure 15.** Flowchart showing the fine-mapping pipeline in PAINTOR.

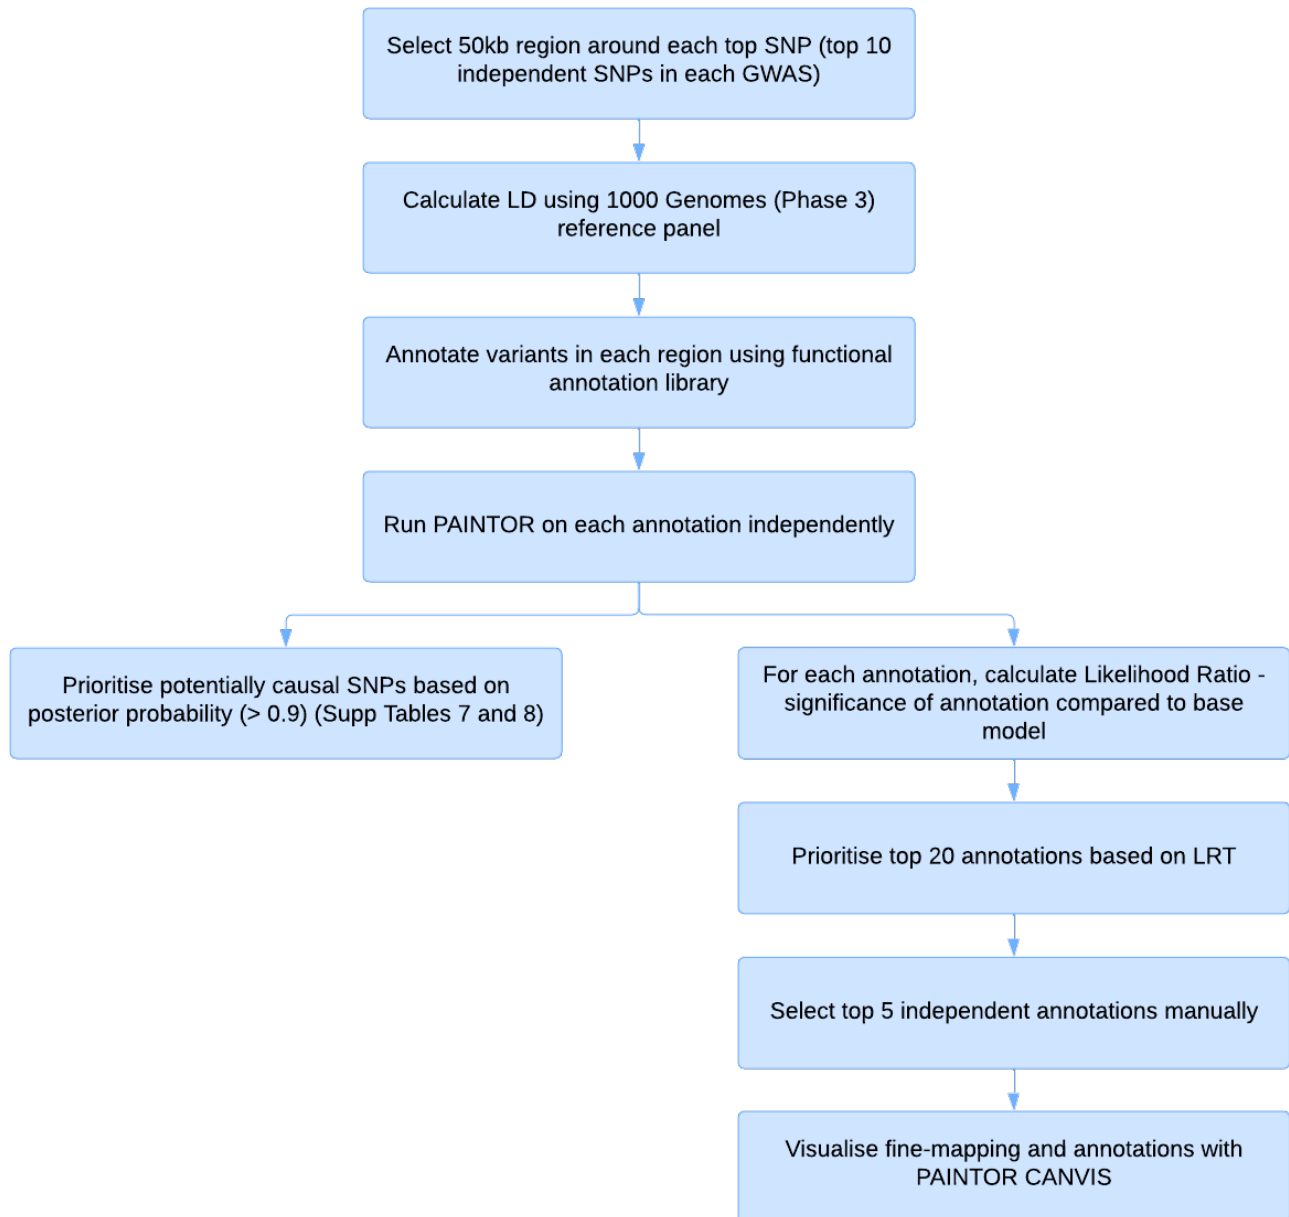

## SUPPLEMENTARY TABLES

**Supplementary Table 1.** Study-specific lambdas (genomic inflation factor) for each GWAS

| <b>Cohort</b>                 | <b>Mortality</b> | <b>HY3</b> |
|-------------------------------|------------------|------------|
| Tracking Parkinson's          | 1.02             | 1.01       |
| Oxford Discovery              | 1.03             | 0.99       |
| PPMI                          | NA               | 0.99       |
| QSBB                          | 1.15             | NA         |
| UKB - incident                | 1.03             | NA         |
| UKB - prevalent               | 0.97             | NA         |
| Calypso                       | 1.10             | NA         |
| CamPaiGN                      | 1.08             | NA         |
| Cambridge PD Research Clinic  | 1.27             | NA         |
| DIGPD                         | 0.95             | 1.00       |
| Trondheim                     | 1.04             | NA         |
| Oslo                          | 1.12             | 1.06       |
| Meta-analysis (after filters) | 1.04             | 1.03       |

Each GWAS was adjusted for age at onset, gender, and PC1-PC5 (see Methods). NAs indicate that cohort was not included for that GWAS, either because not enough individuals met the outcome or because relevant clinical data was not available (see Methods). Cohorts with genomic inflation factor of > 1.2 in a GWAS were excluded from meta-analysis of that outcome (highlighted in red).

CamPaiGN = Cambridgeshire Parkinson's Incidence from GP to Neurologist; DIGPD = Drug Interaction With Genes in Parkinson's Disease; HY3 = Hoehn and Yahr stage 3 or greater. PPMI = Parkinson's Progression Markers Initiative; QSBB = Queen Square Brain Bank pathologically-confirmed PD cases; UKB = UK Biobank

**Supplementary Table 2.** Full colocalisation results for PD mortality and eQTLs in eQTLGen and PsychENCODE.

| prior_type | GWAS_1       | dataset     | gene_2          | hgnc_symbol    | nsnps | PP.H0.abf | PP.H1.abf | PP.H2.abf | PP.H3.abf | PP.H4.abf | sum_PPH3_PPH4 | ratio_PH4_PPH3 | p12      |
|------------|--------------|-------------|-----------------|----------------|-------|-----------|-----------|-----------|-----------|-----------|---------------|----------------|----------|
| liberal    | PD_mortality | psychencode | ENSG00000104859 | CLASRP         | 3296  | 5.28E-05  | 4.71E-01  | 1.20E-05  | 0.1062839 | 0.4226319 | 0.5289158     | 3.9764450      | 1.00E-05 |
| robust     | PD_mortality | psychencode | ENSG00000104859 | CLASRP         | 3296  | 6.70E-05  | 5.97E-01  | 1.52E-05  | 0.1347610 | 0.2679349 | 0.4026959     | 1.9882225      | 5.00E-06 |
| liberal    | PD_mortality | psychencode | ENSG00000064393 | HIPK2          | 2574  | 3.15E-03  | 6.89E-01  | 6.38E-04  | 0.1392676 | 0.1683492 | 0.3076169     | 1.2088182      | 1.00E-05 |
| liberal    | PD_mortality | psychencode | ENSG00000257435 |                | 4037  | 2.28E-03  | 5.92E-01  | 1.01E-03  | 0.2619352 | 0.1428419 | 0.4047771     | 0.5453331      | 1.00E-05 |
| liberal    | PD_mortality | psychencode | ENSG00000241661 | PPP1R2P6       | 2433  | 2.88E-03  | 6.24E-01  | 1.28E-03  | 0.2776446 | 0.0940457 | 0.3716903     | 0.3387270      | 1.00E-05 |
| robust     | PD_mortality | psychencode | ENSG00000064393 | HIPK2          | 2574  | 3.44E-03  | 7.52E-01  | 6.97E-04  | 0.1520679 | 0.0919112 | 0.2439791     | 0.6044091      | 5.00E-06 |
| liberal    | PD_mortality | psychencode | ENSG00000271537 |                | 2940  | 3.34E-03  | 7.44E-01  | 7.27E-04  | 0.1614372 | 0.0909891 | 0.2524263     | 0.5636193      | 1.00E-05 |
| liberal    | PD_mortality | psychencode | ENSG00000267114 |                | 3305  | 7.06E-05  | 6.30E-01  | 3.14E-05  | 0.2795213 | 0.0906603 | 0.3701816     | 0.3243414      | 1.00E-05 |
| liberal    | PD_mortality | psychencode | ENSG00000012061 | ERCC1          | 3679  | 7.05E-05  | 6.29E-01  | 3.20E-05  | 0.2857667 | 0.0851910 | 0.3709578     | 0.2981138      | 1.00E-05 |
| liberal    | PD_mortality | psychencode | ENSG00000103200 |                | 2483  | 3.55E-03  | 7.69E-01  | 6.62E-04  | 0.1431077 | 0.0839033 | 0.2270110     | 0.5862944      | 1.00E-05 |
| robust     | PD_mortality | psychencode | ENSG00000257435 |                | 4037  | 2.46E-03  | 6.37E-01  | 1.09E-03  | 0.2820817 | 0.0769142 | 0.3589959     | 0.2726665      | 5.00E-06 |
| liberal    | PD_mortality | psychencode | ENSG00000270512 |                | 2422  | 3.18E-03  | 6.87E-01  | 1.08E-03  | 0.2332989 | 0.0750511 | 0.3083500     | 0.3216948      | 1.00E-05 |
| liberal    | PD_mortality | psychencode | ENSG00000087470 | DNM1L          | 4155  | 2.79E-03  | 7.24E-01  | 7.81E-04  | 0.2025122 | 0.0694637 | 0.2719759     | 0.3430097      | 1.00E-05 |
| liberal    | PD_mortality | psychencode | ENSG00000240889 | NDUFB2-AS1     | 2329  | 3.54E-03  | 7.62E-01  | 7.66E-04  | 0.1648099 | 0.0688845 | 0.2336944     | 0.4179633      | 1.00E-05 |
| liberal    | PD_mortality | psychencode | ENSG00000242675 | RPS16P9        | 3743  | 7.97E-05  | 7.11E-01  | 2.47E-05  | 0.2200182 | 0.0687333 | 0.2887515     | 0.3123983      | 1.00E-05 |
| liberal    | PD_mortality | psychencode | ENSG00000253183 |                | 2800  | 3.54E-03  | 7.73E-01  | 7.09E-04  | 0.1545282 | 0.0679881 | 0.2225163     | 0.4399721      | 1.00E-05 |
| liberal    | PD_mortality | psychencode | ENSG00000059378 | PARP12         | 2358  | 3.39E-03  | 7.40E-01  | 8.68E-04  | 0.1892351 | 0.0662562 | 0.2554913     | 0.3501263      | 1.00E-05 |
| liberal    | PD_mortality | psychencode | ENSG00000007047 | MARK4          | 3336  | 8.58E-05  | 7.65E-01  | 1.92E-05  | 0.1715442 | 0.0635789 | 0.2351230     | 0.3706268      | 1.00E-05 |
| liberal    | PD_mortality | psychencode | ENSG00000229677 |                | 2970  | 3.42E-03  | 7.62E-01  | 7.69E-04  | 0.1715159 | 0.0620017 | 0.2335176     | 0.3614921      | 1.00E-05 |
| liberal    | PD_mortality | psychencode | ENSG00000240173 | RN7SL771P      | 2357  | 3.57E-03  | 7.69E-01  | 7.66E-04  | 0.1650231 | 0.0613466 | 0.2263697     | 0.3717456      | 1.00E-05 |
| liberal    | PD_mortality | psychencode | ENSG00000271404 |                | 2864  | 3.50E-03  | 7.78E-01  | 7.16E-04  | 0.1592179 | 0.0586972 | 0.2179152     | 0.3686596      | 1.00E-05 |
| liberal    | PD_mortality | psychencode | ENSG00000146963 | C7orf55-LUC7L2 | 2868  | 3.50E-03  | 7.72E-01  | 7.51E-04  | 0.1657247 | 0.0584782 | 0.2242029     | 0.3528635      | 1.00E-05 |
| liberal    | PD_mortality | psychencode | ENSG00000273391 |                | 2849  | 3.54E-03  | 7.81E-01  | 7.10E-04  | 0.1564343 | 0.0578420 | 0.2142763     | 0.3697527      | 1.00E-05 |
| liberal    | PD_mortality | psychencode | ENSG00000176182 | MYPOP          | 3631  | 7.37E-05  | 6.52E-01  | 3.30E-05  | 0.2917257 | 0.0564488 | 0.3481746     | 0.1934996      | 1.00E-05 |
| liberal    | PD_mortality | psychencode | ENSG00000059377 | TBXAS1         | 2577  | 3.52E-03  | 7.68E-01  | 7.86E-04  | 0.1717176 | 0.0556299 | 0.2273475     | 0.3239613      | 1.00E-05 |
| liberal    | PD_mortality | psychencode | ENSG00000236279 | CLEC2L         | 2810  | 3.21E-03  | 7.02E-01  | 1.10E-03  | 0.2409026 | 0.0527959 | 0.2936984     | 0.2191586      | 1.00E-05 |
| liberal    | PD_mortality | psychencode | ENSG00000239254 |                | 2958  | 3.60E-03  | 8.01E-01  | 6.45E-04  | 0.1434352 | 0.0517783 | 0.1952135     | 0.3609874      | 1.00E-05 |
| liberal    | PD_mortality | psychencode | ENSG00000157741 | UBN2           | 2866  | 3.57E-03  | 7.94E-01  | 6.78E-04  | 0.1506067 | 0.0514063 | 0.2020130     | 0.3413280      | 1.00E-05 |
| liberal    | PD_mortality | psychencode | ENSG00000159885 | ZNF222         | 3417  | 8.25E-05  | 7.36E-01  | 2.39E-05  | 0.2128929 | 0.0506354 | 0.2635283     | 0.2378442      | 1.00E-05 |
| liberal    | PD_mortality | psychencode | ENSG00000228360 |                | 2864  | 3.52E-03  | 7.82E-01  | 7.33E-04  | 0.1629685 | 0.0505334 | 0.2135019     | 0.3100808      | 1.00E-05 |
| liberal    | PD_mortality | psychencode | ENSG00000146858 | ZC3HAV1L       | 2965  | 3.52E-03  | 7.85E-01  | 7.21E-04  | 0.1607314 | 0.0503386 | 0.2110700     | 0.3131844      | 1.00E-05 |
| liberal    | PD_mortality | psychencode | ENSG00000146955 | RAB19          | 2495  | 3.77E-03  | 8.17E-01  | 5.98E-04  | 0.1293450 | 0.0495833 | 0.1789284     | 0.3833418      | 1.00E-05 |

|         |              |             |                 |            |      |          |          |          |           |           |           |           |          |
|---------|--------------|-------------|-----------------|------------|------|----------|----------|----------|-----------|-----------|-----------|-----------|----------|
| robust  | PD_mortality | psychencode | ENSG00000241661 | PPP1R2P6   | 2433 | 3.03E-03 | 6.55E-01 | 1.35E-03 | 0.2913444 | 0.0493431 | 0.3406876 | 0.1693635 | 5.00E-06 |
| liberal | PD_mortality | psychencode | ENSG00000104881 | PPP1R13L   | 3673 | 7.47E-05 | 6.66E-01 | 3.20E-05 | 0.2854679 | 0.0485583 | 0.3340262 | 0.1701007 | 1.00E-05 |
| liberal | PD_mortality | psychencode | ENSG00000105948 | TTC26      | 2969 | 3.32E-03 | 7.41E-01 | 9.29E-04 | 0.2069821 | 0.0482485 | 0.2552306 | 0.2331044 | 1.00E-05 |
| robust  | PD_mortality | psychencode | ENSG00000271537 |            | 2940 | 3.50E-03 | 7.79E-01 | 7.61E-04 | 0.1691318 | 0.0476630 | 0.2167948 | 0.2818096 | 5.00E-06 |
| robust  | PD_mortality | psychencode | ENSG00000267114 |            | 3305 | 7.40E-05 | 6.60E-01 | 3.28E-05 | 0.2927937 | 0.0474826 | 0.3402762 | 0.1621707 | 5.00E-06 |
| liberal | PD_mortality | psychencode | ENSG00000254270 | ERHP1      | 2823 | 3.50E-03 | 7.65E-01 | 8.37E-04 | 0.1828693 | 0.0473752 | 0.2302445 | 0.2590660 | 1.00E-05 |
| liberal | PD_mortality | psychencode | ENSG00000157764 | BRAF       | 2352 | 3.50E-03 | 7.52E-01 | 9.18E-04 | 0.1968230 | 0.0471145 | 0.2439375 | 0.2393750 | 1.00E-05 |
| liberal | PD_mortality | psychencode | ENSG00000257316 |            | 4035 | 2.89E-03 | 7.49E-01 | 7.73E-04 | 0.2007236 | 0.0463033 | 0.2470269 | 0.2306817 | 1.00E-05 |
| liberal | PD_mortality | psychencode | ENSG00000216588 | IGSF23     | 3426 | 8.63E-05 | 7.70E-01 | 2.06E-05 | 0.1837740 | 0.0461781 | 0.2299521 | 0.2512765 | 1.00E-05 |
| robust  | PD_mortality | psychencode | ENSG0000012061  | ERCC1      | 3679 | 7.36E-05 | 6.57E-01 | 3.35E-05 | 0.2984807 | 0.0444906 | 0.3429713 | 0.1490569 | 5.00E-06 |
| robust  | PD_mortality | psychencode | ENSG00000103200 |            | 2483 | 3.71E-03 | 8.02E-01 | 6.91E-04 | 0.1493742 | 0.0437886 | 0.1931629 | 0.2931472 | 5.00E-06 |
| liberal | PD_mortality | psychencode | ENSG00000142273 | CBLC       | 3387 | 7.60E-05 | 6.78E-01 | 3.13E-05 | 0.2791203 | 0.0428036 | 0.3219239 | 0.1533517 | 1.00E-05 |
| liberal | PD_mortality | psychencode | ENSG00000159917 | ZNF235     | 3527 | 6.79E-05 | 6.05E-01 | 3.95E-05 | 0.3525874 | 0.0420107 | 0.3945981 | 0.1191498 | 1.00E-05 |
| liberal | PD_mortality | psychencode | ENSG00000241226 | RN7SL836P  | 3769 | 7.33E-05 | 6.54E-01 | 3.43E-05 | 0.3057450 | 0.0405628 | 0.3463078 | 0.1326687 | 1.00E-05 |
| liberal | PD_mortality | psychencode | ENSG00000256614 |            | 3028 | 3.10E-03 | 8.03E-01 | 5.93E-04 | 0.1539017 | 0.0390398 | 0.1929415 | 0.2536672 | 1.00E-05 |
| robust  | PD_mortality | psychencode | ENSG00000270512 |            | 2422 | 3.30E-03 | 7.14E-01 | 1.12E-03 | 0.2423949 | 0.0389886 | 0.2813835 | 0.1608474 | 5.00E-06 |
| liberal | PD_mortality | psychencode | ENSG00000104941 | RSPH6A     | 3746 | 8.13E-05 | 7.25E-01 | 2.65E-05 | 0.2362123 | 0.0389226 | 0.2751350 | 0.1647781 | 1.00E-05 |
| liberal | PD_mortality | psychencode | ENSG00000267144 |            | 3417 | 8.79E-05 | 7.84E-01 | 2.00E-05 | 0.1781057 | 0.0378861 | 0.2159918 | 0.2127167 | 1.00E-05 |
| liberal | PD_mortality | psychencode | ENSG00000267680 | ZNF224     | 3452 | 8.24E-05 | 7.35E-01 | 2.54E-05 | 0.2267476 | 0.0377430 | 0.2644907 | 0.1664540 | 1.00E-05 |
| liberal | PD_mortality | psychencode | ENSG00000270807 |            | 3948 | 2.99E-03 | 7.77E-01 | 7.01E-04 | 0.1820072 | 0.0370589 | 0.2190662 | 0.2036124 | 1.00E-05 |
| robust  | PD_mortality | psychencode | ENSG00000087470 | DNM1L      | 4155 | 2.89E-03 | 7.51E-01 | 8.09E-04 | 0.2097989 | 0.0359815 | 0.2457805 | 0.1715049 | 5.00E-06 |
| liberal | PD_mortality | psychencode | ENSG00000244743 |            | 4130 | 2.87E-03 | 7.46E-01 | 8.27E-04 | 0.2145739 | 0.0359021 | 0.2504760 | 0.1673179 | 1.00E-05 |
| robust  | PD_mortality | psychencode | ENSG00000240889 | NDUFB2-AS1 | 2329 | 3.67E-03 | 7.89E-01 | 7.93E-04 | 0.1706888 | 0.0356708 | 0.2063596 | 0.2089817 | 5.00E-06 |
| robust  | PD_mortality | psychencode | ENSG00000242675 | RPS16P9    | 3743 | 8.26E-05 | 7.36E-01 | 2.56E-05 | 0.2278486 | 0.0355898 | 0.2634383 | 0.1561991 | 5.00E-06 |
| liberal | PD_mortality | psychencode | ENSG00000104856 | RELB       | 3256 | 8.93E-05 | 7.96E-01 | 1.89E-05 | 0.1682908 | 0.0353860 | 0.2036769 | 0.2102670 | 1.00E-05 |
| robust  | PD_mortality | psychencode | ENSG00000253183 |            | 2800 | 3.67E-03 | 8.00E-01 | 7.34E-04 | 0.1599661 | 0.0351903 | 0.1951564 | 0.2199860 | 5.00E-06 |
| liberal | PD_mortality | psychencode | ENSG00000185800 | DMWD       | 3727 | 7.31E-05 | 6.52E-01 | 3.51E-05 | 0.3134229 | 0.0345039 | 0.3479268 | 0.1100875 | 1.00E-05 |
| robust  | PD_mortality | psychencode | ENSG00000059378 | PARP12     | 2358 | 3.51E-03 | 7.66E-01 | 8.98E-04 | 0.1957189 | 0.0342632 | 0.2299821 | 0.1750632 | 5.00E-06 |
| liberal | PD_mortality | psychencode | ENSG00000139131 | YARS2      | 4163 | 2.93E-03 | 7.61E-01 | 7.82E-04 | 0.2028063 | 0.0329623 | 0.2357686 | 0.1625308 | 1.00E-05 |
| robust  | PD_mortality | psychencode | ENSG00000007047 | MARK4      | 3336 | 8.86E-05 | 7.90E-01 | 1.99E-05 | 0.1771765 | 0.0328332 | 0.2100097 | 0.1853134 | 5.00E-06 |
| robust  | PD_mortality | psychencode | ENSG00000229677 |            | 2970 | 3.53E-03 | 7.87E-01 | 7.94E-04 | 0.1770031 | 0.0319926 | 0.2089958 | 0.1807461 | 5.00E-06 |

|         |              |             |                 |                |      |          |          |          |           |           |           |           |          |
|---------|--------------|-------------|-----------------|----------------|------|----------|----------|----------|-----------|-----------|-----------|-----------|----------|
| liberal | PD_mortality | psychencode | ENSG00000270679 |                | 3547 | 8.35E-05 | 7.45E-01 | 2.51E-05 | 0.2233927 | 0.0318996 | 0.2552923 | 0.1427959 | 1.00E-05 |
| liberal | PD_mortality | psychencode | ENSG00000267348 |                | 3378 | 8.77E-05 | 7.82E-01 | 2.09E-05 | 0.1863274 | 0.0318523 | 0.2181797 | 0.1709481 | 1.00E-05 |
| robust  | PD_mortality | psychencode | ENSG00000240173 | RN7SL771P      | 2357 | 3.68E-03 | 7.94E-01 | 7.90E-04 | 0.1702450 | 0.0316439 | 0.2018890 | 0.1858728 | 5.00E-06 |
| liberal | PD_mortality | psychencode | ENSG00000267173 |                | 3480 | 8.92E-05 | 7.96E-01 | 1.94E-05 | 0.1725408 | 0.0316093 | 0.2041501 | 0.1831992 | 1.00E-05 |
| liberal | PD_mortality | psychencode | ENSG00000125753 | VASP           | 3729 | 8.17E-05 | 7.28E-01 | 2.69E-05 | 0.2400149 | 0.0315657 | 0.2715806 | 0.1315156 | 1.00E-05 |
| liberal | PD_mortality | psychencode | ENSG00000007255 | TRAPPC6A       | 3489 | 7.25E-05 | 6.47E-01 | 3.61E-05 | 0.3217212 | 0.0315455 | 0.3532667 | 0.0980523 | 1.00E-05 |
| liberal | PD_mortality | psychencode | ENSG00000266921 |                | 3387 | 8.34E-05 | 7.44E-01 | 2.52E-05 | 0.2249156 | 0.0311191 | 0.2560347 | 0.1383592 | 1.00E-05 |
| liberal | PD_mortality | psychencode | ENSG00000170608 | FOXA3          | 3675 | 8.40E-05 | 7.49E-01 | 2.46E-05 | 0.2194315 | 0.0310167 | 0.2504482 | 0.1413504 | 1.00E-05 |
| robust  | PD_mortality | psychencode | ENSG00000271404 |                | 2864 | 3.60E-03 | 8.01E-01 | 7.38E-04 | 0.1640320 | 0.0302360 | 0.1942680 | 0.1843298 | 5.00E-06 |
| liberal | PD_mortality | psychencode | ENSG00000187244 | BCAM           | 3339 | 8.66E-05 | 7.72E-01 | 2.22E-05 | 0.1976900 | 0.0302038 | 0.2278938 | 0.1527837 | 1.00E-05 |
| robust  | PD_mortality | psychencode | ENSG00000146963 | C7orf55-LUC7L2 | 2868 | 3.60E-03 | 7.95E-01 | 7.74E-04 | 0.1707163 | 0.0301198 | 0.2008360 | 0.1764318 | 5.00E-06 |
| robust  | PD_mortality | psychencode | ENSG00000273391 |                | 2849 | 3.65E-03 | 8.05E-01 | 7.31E-04 | 0.1610932 | 0.0297823 | 0.1908756 | 0.1848763 | 5.00E-06 |
| liberal | PD_mortality | psychencode | ENSG00000255652 |                | 3056 | 2.79E-03 | 7.23E-01 | 9.38E-04 | 0.2434276 | 0.0295494 | 0.2729770 | 0.1213890 | 1.00E-05 |
| robust  | PD_mortality | psychencode | ENSG00000176182 | MYPOP          | 3631 | 7.58E-05 | 6.71E-01 | 3.40E-05 | 0.3001987 | 0.0290442 | 0.3292428 | 0.0967498 | 5.00E-06 |
| liberal | PD_mortality | psychencode | ENSG00000267346 | EIF5AP3        | 3455 | 8.62E-05 | 7.68E-01 | 2.27E-05 | 0.2024186 | 0.0290281 | 0.2314466 | 0.1434063 | 1.00E-05 |
| liberal | PD_mortality | psychencode | ENSG00000130203 | APOE           | 3323 | 9.01E-05 | 8.03E-01 | 1.88E-05 | 0.1675427 | 0.0288744 | 0.1964171 | 0.1723408 | 1.00E-05 |
| liberal | PD_mortality | psychencode | ENSG00000267545 |                | 3494 | 8.74E-05 | 7.79E-01 | 2.15E-05 | 0.1918428 | 0.0287814 | 0.2206242 | 0.1500259 | 1.00E-05 |
| robust  | PD_mortality | psychencode | ENSG00000059377 | TBXAS1         | 2577 | 3.62E-03 | 7.90E-01 | 8.09E-04 | 0.1766306 | 0.0286107 | 0.2052413 | 0.1619807 | 5.00E-06 |
| liberal | PD_mortality | psychencode | ENSG00000267188 |                | 3408 | 8.44E-05 | 7.53E-01 | 2.45E-05 | 0.2184139 | 0.0285881 | 0.2470021 | 0.1308896 | 1.00E-05 |
| liberal | PD_mortality | psychencode | ENSG00000266958 |                | 3500 | 8.38E-05 | 7.47E-01 | 2.51E-05 | 0.2239439 | 0.0284674 | 0.2524113 | 0.1271184 | 1.00E-05 |
| liberal | PD_mortality | psychencode | ENSG00000230666 | CEACAM22P      | 3417 | 8.35E-05 | 7.45E-01 | 2.54E-05 | 0.2266284 | 0.0283393 | 0.2549677 | 0.1250476 | 1.00E-05 |
| liberal | PD_mortality | psychencode | ENSG00000267590 | NDUFA3P1       | 3539 | 8.60E-05 | 7.67E-01 | 2.30E-05 | 0.2051865 | 0.0281646 | 0.2333511 | 0.1372635 | 1.00E-05 |
| liberal | PD_mortality | psychencode | ENSG00000167380 | ZNF226         | 3446 | 2.02E-05 | 1.80E-01 | 8.87E-05 | 0.7914004 | 0.0280923 | 0.8194926 | 0.0354969 | 1.00E-05 |
| liberal | PD_mortality | psychencode | ENSG00000131115 | ZNF227         | 3482 | 8.69E-05 | 7.75E-01 | 2.21E-05 | 0.1967812 | 0.0280862 | 0.2248674 | 0.1427280 | 1.00E-05 |
| liberal | PD_mortality | psychencode | ENSG00000269148 |                | 3744 | 8.21E-05 | 7.32E-01 | 2.69E-05 | 0.2395878 | 0.0280027 | 0.2675905 | 0.1168788 | 1.00E-05 |
| liberal | PD_mortality | psychencode | ENSG00000214855 | APOC1P1        | 3362 | 4.47E-05 | 3.98E-01 | 6.44E-05 | 0.5742495 | 0.0273266 | 0.6015760 | 0.0475866 | 1.00E-05 |
| liberal | PD_mortality | psychencode | ENSG00000267757 | C19orf83       | 3763 | 8.47E-05 | 7.56E-01 | 2.43E-05 | 0.2167322 | 0.0272997 | 0.2440318 | 0.1259604 | 1.00E-05 |
| liberal | PD_mortality | psychencode | ENSG00000267037 |                | 3457 | 8.59E-05 | 7.66E-01 | 2.31E-05 | 0.2064192 | 0.0272042 | 0.2336234 | 0.1317909 | 1.00E-05 |
| liberal | PD_mortality | psychencode | ENSG00000256294 | ZNF225         | 3450 | 8.43E-05 | 7.52E-01 | 2.47E-05 | 0.2206282 | 0.0271976 | 0.2478259 | 0.1232735 | 1.00E-05 |
| liberal | PD_mortality | psychencode | ENSG00000265842 | RN7SL53P       | 3443 | 8.48E-05 | 7.56E-01 | 2.43E-05 | 0.2167559 | 0.0271579 | 0.2439138 | 0.1252926 | 1.00E-05 |
| liberal | PD_mortality | psychencode | ENSG00000259605 |                | 3689 | 8.54E-05 | 7.61E-01 | 2.37E-05 | 0.2113307 | 0.0271209 | 0.2384516 | 0.1283338 | 1.00E-05 |
| robust  | PD_mortality | psychencode | ENSG00000236279 | CLEC2L         | 2810 | 3.30E-03 | 7.21E-01 | 1.13E-03 | 0.2474343 | 0.0271137 | 0.2745480 | 0.1095793 | 5.00E-06 |
| liberal | PD_mortality | psychencode | ENSG00000267282 |                | 3311 | 8.38E-05 | 7.47E-01 | 2.53E-05 | 0.2260092 | 0.0268181 | 0.2528273 | 0.1186591 | 1.00E-05 |
| liberal | PD_mortality | psychencode | ENSG00000177045 | SIX5           | 3693 | 8.41E-05 | 7.50E-01 | 2.50E-05 | 0.2227560 | 0.0268068 | 0.2495628 | 0.1203413 | 1.00E-05 |



|         |              |             |                 |          |      |          |          |          |           |           |           |           |          |
|---------|--------------|-------------|-----------------|----------|------|----------|----------|----------|-----------|-----------|-----------|-----------|----------|
| liberal | PD_mortality | psychencode | ENSG00000267045 |          | 3577 | 8.26E-05 | 7.37E-01 | 2.65E-05 | 0.2366102 | 0.0266157 | 0.2632258 | 0.1124874 | 1.00E-05 |
| robust  | PD_mortality | psychencode | ENSG00000239254 |          | 2958 | 3.70E-03 | 8.22E-01 | 6.62E-04 | 0.1472473 | 0.0265772 | 0.1738246 | 0.1804937 | 5.00E-06 |
| robust  | PD_mortality | psychencode | ENSG00000157741 | UBN2     | 2866 | 3.67E-03 | 8.15E-01 | 6.96E-04 | 0.1545799 | 0.0263812 | 0.1809611 | 0.1706640 | 5.00E-06 |
| liberal | PD_mortality | psychencode | ENSG00000268434 |          | 3719 | 8.43E-05 | 7.52E-01 | 2.49E-05 | 0.2217920 | 0.0262009 | 0.2479929 | 0.1181329 | 1.00E-05 |
| liberal | PD_mortality | psychencode | ENSG00000125740 | FOSB     | 3720 | 8.65E-05 | 7.71E-01 | 2.27E-05 | 0.2026241 | 0.0261021 | 0.2287262 | 0.1288205 | 1.00E-05 |
| robust  | PD_mortality | psychencode | ENSG00000159885 | ZNF222   | 3417 | 8.47E-05 | 7.55E-01 | 2.45E-05 | 0.2184229 | 0.0259753 | 0.2443982 | 0.1189221 | 5.00E-06 |
| liberal | PD_mortality | psychencode | ENSG00000267044 |          | 3462 | 8.72E-05 | 7.78E-01 | 2.20E-05 | 0.1959133 | 0.0259662 | 0.2218795 | 0.1325390 | 1.00E-05 |
| liberal | PD_mortality | psychencode | ENSG00000245482 |          | 3388 | 2.39E-03 | 6.21E-01 | 1.34E-03 | 0.3491484 | 0.0259358 | 0.3750841 | 0.0742830 | 1.00E-05 |
| robust  | PD_mortality | psychencode | ENSG00000228360 |          | 2864 | 3.61E-03 | 8.03E-01 | 7.52E-04 | 0.1671929 | 0.0259217 | 0.1931145 | 0.1550404 | 5.00E-06 |
| liberal | PD_mortality | eQTLGen     | ENSG00000167384 | ZNF180   | 5445 | 3.19E-05 | 4.21E-01 | 4.20E-05 | 0.5532884 | 0.0258634 | 0.5791518 | 0.0467449 | 1.00E-05 |
| liberal | PD_mortality | psychencode | ENSG00000177464 | GPR4     | 3763 | 8.56E-05 | 7.63E-01 | 2.36E-05 | 0.2108005 | 0.0258313 | 0.2366318 | 0.1225389 | 1.00E-05 |
| robust  | PD_mortality | psychencode | ENSG00000146858 | ZC3HAV1L | 2965 | 3.61E-03 | 8.05E-01 | 7.39E-04 | 0.1648814 | 0.0258191 | 0.1907005 | 0.1565922 | 5.00E-06 |
| liberal | PD_mortality | psychencode | ENSG00000069399 | BCL3     | 3410 | 7.89E-05 | 7.04E-01 | 3.04E-05 | 0.2706562 | 0.0256639 | 0.2963201 | 0.0948211 | 1.00E-05 |
| liberal | PD_mortality | psychencode | ENSG00000130201 | EXOC3L2  | 3543 | 8.54E-05 | 7.61E-01 | 2.39E-05 | 0.2130907 | 0.0255151 | 0.2386058 | 0.1197382 | 1.00E-05 |
| liberal | PD_mortality | psychencode | ENSG00000267163 |          | 3453 | 7.94E-05 | 7.08E-01 | 2.99E-05 | 0.2664028 | 0.0255088 | 0.2919116 | 0.0957527 | 1.00E-05 |
| liberal | PD_mortality | psychencode | ENSG00000104884 | ERCC2    | 3699 | 8.55E-05 | 7.62E-01 | 2.38E-05 | 0.2121148 | 0.0254622 | 0.2375770 | 0.1200398 | 1.00E-05 |
| robust  | PD_mortality | psychencode | ENSG00000146955 | RAB19    | 2495 | 3.87E-03 | 8.37E-01 | 6.13E-04 | 0.1326332 | 0.0254219 | 0.1580552 | 0.1916709 | 5.00E-06 |
| liberal | PD_mortality | psychencode | ENSG00000057294 | PKP2     | 4046 | 2.43E-03 | 6.30E-01 | 1.31E-03 | 0.3410271 | 0.0253124 | 0.3663395 | 0.0742241 | 1.00E-05 |
| liberal | PD_mortality | psychencode | ENSG00000130204 | TOMM40   | 3313 | 7.81E-05 | 6.96E-01 | 3.12E-05 | 0.2782434 | 0.0251898 | 0.3034332 | 0.0905313 | 1.00E-05 |
| liberal | PD_mortality | psychencode | ENSG00000267395 |          | 3689 | 8.57E-05 | 7.64E-01 | 2.36E-05 | 0.2107726 | 0.0251353 | 0.2359079 | 0.1192533 | 1.00E-05 |
| liberal | PD_mortality | psychencode | ENSG00000104879 | CKM      | 3741 | 7.62E-05 | 6.80E-01 | 3.31E-05 | 0.2951245 | 0.0251204 | 0.3202449 | 0.0851180 | 1.00E-05 |
| liberal | PD_mortality | psychencode | ENSG00000177051 | FBXO46   | 3709 | 6.95E-05 | 6.20E-01 | 3.98E-05 | 0.3548043 | 0.0250874 | 0.3798917 | 0.0707077 | 1.00E-05 |
| robust  | PD_mortality | psychencode | ENSG00000104881 | PPP1R13L | 3673 | 7.65E-05 | 6.82E-01 | 3.28E-05 | 0.2925713 | 0.0248833 | 0.3174546 | 0.0850504 | 5.00E-06 |
| liberal | PD_mortality | psychencode | ENSG00000267467 | APOC4    | 3336 | 8.23E-05 | 7.34E-01 | 2.70E-05 | 0.2409704 | 0.0248190 | 0.2657894 | 0.1029962 | 1.00E-05 |
| robust  | PD_mortality | psychencode | ENSG00000105948 | TTC26    | 2969 | 3.41E-03 | 7.59E-01 | 9.52E-04 | 0.2120989 | 0.0247206 | 0.2368194 | 0.1165522 | 5.00E-06 |
| liberal | PD_mortality | psychencode | ENSG00000104853 | CLPTM1   | 3304 | 7.26E-05 | 6.47E-01 | 3.68E-05 | 0.3280802 | 0.0247179 | 0.3527981 | 0.0753411 | 1.00E-05 |
| liberal | PD_mortality | psychencode | ENSG00000104866 | PPP1R37  | 3385 | 7.69E-05 | 6.85E-01 | 3.25E-05 | 0.2897808 | 0.0246572 | 0.3144380 | 0.0850893 | 1.00E-05 |
| robust  | PD_mortality | psychencode | ENSG00000254270 | ERHP1    | 2823 | 3.59E-03 | 7.84E-01 | 8.58E-04 | 0.1873061 | 0.0242623 | 0.2115684 | 0.1295330 | 5.00E-06 |
| robust  | PD_mortality | psychencode | ENSG00000157764 | BRAF     | 2352 | 3.59E-03 | 7.70E-01 | 9.40E-04 | 0.2015715 | 0.0241256 | 0.2256970 | 0.1196875 | 5.00E-06 |
| robust  | PD_mortality | psychencode | ENSG00000257316 |          | 4035 | 2.95E-03 | 7.67E-01 | 7.92E-04 | 0.2054809 | 0.0237003 | 0.2291812 | 0.1153409 | 5.00E-06 |
| robust  | PD_mortality | psychencode | ENSG00000216588 | IGSF23   | 3426 | 8.84E-05 | 7.88E-01 | 2.11E-05 | 0.1881174 | 0.0236347 | 0.2117522 | 0.1256382 | 5.00E-06 |
| liberal | PD_mortality | psychencode | ENSG00000268341 |          | 3734 | 5.00E-05 | 4.46E-01 | 5.95E-05 | 0.5308652 | 0.0228820 | 0.5537473 | 0.0431033 | 1.00E-05 |
| robust  | PD_mortality | psychencode | ENSG00000142273 | CBLC     | 3387 | 7.77E-05 | 6.93E-01 | 3.20E-05 | 0.2852247 | 0.0218698 | 0.3070945 | 0.0766759 | 5.00E-06 |
| liberal | PD_mortality | psychencode | ENSG00000263002 | ZNF234   | 3437 | 6.92E-05 | 6.18E-01 | 4.05E-05 | 0.3608785 | 0.0215076 | 0.3823861 | 0.0595979 | 1.00E-05 |

|         |              |             |                 |            |      |          |          |          |           |           |           |           |          |
|---------|--------------|-------------|-----------------|------------|------|----------|----------|----------|-----------|-----------|-----------|-----------|----------|
| robust  | PD_mortality | psychencode | ENSG00000159917 | ZNF235     | 3527 | 6.93E-05 | 6.18E-01 | 4.04E-05 | 0.3601526 | 0.0214560 | 0.3816086 | 0.0595749 | 5.00E-06 |
| liberal | PD_mortality | psychencode | ENSG00000170684 | ZNF296     | 3325 | 6.09E-05 | 5.43E-01 | 4.89E-05 | 0.4358993 | 0.0207903 | 0.4566896 | 0.0476952 | 1.00E-05 |
| liberal | PD_mortality | psychencode | ENSG00000257511 |            | 4156 | 1.94E-03 | 5.04E-01 | 1.82E-03 | 0.4710372 | 0.0207382 | 0.4917755 | 0.0440267 | 1.00E-05 |
| robust  | PD_mortality | psychencode | ENSG00000241226 | RN7SL836P  | 3769 | 7.48E-05 | 6.67E-01 | 3.50E-05 | 0.3120743 | 0.0207012 | 0.3327755 | 0.0663343 | 5.00E-06 |
| liberal | PD_mortality | psychencode | ENSG00000267242 |            | 3419 | 6.88E-05 | 6.13E-01 | 4.11E-05 | 0.3663193 | 0.0202690 | 0.3865882 | 0.0553314 | 1.00E-05 |
| robust  | PD_mortality | psychencode | ENSG00000256614 |            | 3028 | 3.16E-03 | 8.19E-01 | 6.05E-04 | 0.1569656 | 0.0199085 | 0.1768741 | 0.1268336 | 5.00E-06 |
| robust  | PD_mortality | psychencode | ENSG00000104941 | RSPH6A     | 3746 | 8.29E-05 | 7.39E-01 | 2.70E-05 | 0.2409006 | 0.0198476 | 0.2607482 | 0.0823890 | 5.00E-06 |
| liberal | PD_mortality | eQTLGen     | ENSG00000159905 | ZNF221     | 5645 | 2.93E-05 | 3.87E-01 | 4.50E-05 | 0.5937755 | 0.0195798 | 0.6133553 | 0.0329751 | 1.00E-05 |
| robust  | PD_mortality | psychencode | ENSG00000267144 |            | 3417 | 8.96E-05 | 7.99E-01 | 2.04E-05 | 0.1815447 | 0.0193088 | 0.2008535 | 0.1063583 | 5.00E-06 |
| robust  | PD_mortality | psychencode | ENSG00000267680 | ZNF224     | 3452 | 8.40E-05 | 7.50E-01 | 2.59E-05 | 0.2311090 | 0.0192345 | 0.2503435 | 0.0832270 | 5.00E-06 |
| liberal | PD_mortality | eQTLGen     | ENSG00000207003 | RNU6-611P  | 5140 | 5.89E-05 | 7.76E-01 | 1.55E-05 | 0.2046577 | 0.0190825 | 0.2237401 | 0.0932408 | 1.00E-05 |
| robust  | PD_mortality | psychencode | ENSG00000270807 |            | 3948 | 3.05E-03 | 7.92E-01 | 7.14E-04 | 0.1854434 | 0.0188793 | 0.2043227 | 0.1018062 | 5.00E-06 |
| liberal | PD_mortality | psychencode | ENSG00000178386 | ZNF223     | 3437 | 6.07E-05 | 5.42E-01 | 4.92E-05 | 0.4392666 | 0.0188236 | 0.4580902 | 0.0428523 | 1.00E-05 |
| robust  | PD_mortality | psychencode | ENSG00000244743 |            | 4130 | 2.93E-03 | 7.59E-01 | 8.42E-04 | 0.2184961 | 0.0182792 | 0.2367753 | 0.0836590 | 5.00E-06 |
| liberal | PD_mortality | psychencode | ENSG00000186019 |            | 3447 | 4.78E-05 | 4.26E-01 | 6.23E-05 | 0.5555221 | 0.0181420 | 0.5736641 | 0.0326575 | 1.00E-05 |
| liberal | PD_mortality | psychencode | ENSG00000117877 | CD3EAP     | 3672 | 4.47E-06 | 3.99E-02 | 1.06E-04 | 0.9419639 | 0.0180628 | 0.9600268 | 0.0191757 | 1.00E-05 |
| robust  | PD_mortality | psychencode | ENSG00000104856 | RELB       | 3256 | 9.09E-05 | 8.11E-01 | 1.92E-05 | 0.1713221 | 0.0180117 | 0.1893337 | 0.1051335 | 5.00E-06 |
| liberal | PD_mortality | psychencode | ENSG00000179846 | NKPD1      | 3462 | 2.43E-05 | 2.17E-01 | 8.58E-05 | 0.7648966 | 0.0179050 | 0.7828016 | 0.0234084 | 1.00E-05 |
| robust  | PD_mortality | psychencode | ENSG00000185800 | DMWD       | 3727 | 7.44E-05 | 6.63E-01 | 3.58E-05 | 0.3189250 | 0.0175548 | 0.3364798 | 0.0550437 | 5.00E-06 |
| liberal | PD_mortality | eQTLGen     | ENSG00000267163 |            | 5420 | 5.57E-05 | 7.34E-01 | 1.88E-05 | 0.2482489 | 0.0174764 | 0.2657253 | 0.0703988 | 1.00E-05 |
| liberal | PD_mortality | psychencode | ENSG00000130208 | APOC1      | 3337 | 2.15E-05 | 1.92E-01 | 8.87E-05 | 0.7909867 | 0.0172044 | 0.8081911 | 0.0217505 | 1.00E-05 |
| liberal | PD_mortality | eQTLGen     | ENSG00000267114 |            | 5172 | 5.30E-05 | 6.98E-01 | 2.16E-05 | 0.2847763 | 0.0168391 | 0.3016154 | 0.0591311 | 1.00E-05 |
| robust  | PD_mortality | psychencode | ENSG00000139131 | YARS2      | 4163 | 2.98E-03 | 7.73E-01 | 7.95E-04 | 0.2062048 | 0.0167573 | 0.2229621 | 0.0812654 | 5.00E-06 |
| liberal | PD_mortality | eQTLGen     | ENSG00000240889 | NDUFB2-AS1 | 4206 | 8.12E-04 | 6.58E-01 | 4.00E-04 | 0.3237813 | 0.0167239 | 0.3405052 | 0.0516518 | 1.00E-05 |
| robust  | PD_mortality | psychencode | ENSG00000270679 |            | 3547 | 8.48E-05 | 7.57E-01 | 2.55E-05 | 0.2270135 | 0.0162083 | 0.2432218 | 0.0713979 | 5.00E-06 |
| robust  | PD_mortality | psychencode | ENSG00000267348 |            | 3378 | 8.91E-05 | 7.94E-01 | 2.12E-05 | 0.1893429 | 0.0161839 | 0.2055268 | 0.0854740 | 5.00E-06 |
| robust  | PD_mortality | psychencode | ENSG00000267173 |            | 3480 | 9.07E-05 | 8.09E-01 | 1.97E-05 | 0.1753115 | 0.0160585 | 0.1913700 | 0.0915996 | 5.00E-06 |
| robust  | PD_mortality | psychencode | ENSG00000125753 | VASP       | 3729 | 8.30E-05 | 7.40E-01 | 2.73E-05 | 0.2438637 | 0.0160359 | 0.2598997 | 0.0657578 | 5.00E-06 |
| robust  | PD_mortality | psychencode | ENSG00000007255 | TRAPPC6A   | 3489 | 7.37E-05 | 6.57E-01 | 3.67E-05 | 0.3268770 | 0.0160255 | 0.3429025 | 0.0490262 | 5.00E-06 |
| robust  | PD_mortality | psychencode | ENSG00000266921 |            | 3387 | 8.47E-05 | 7.56E-01 | 2.56E-05 | 0.2284705 | 0.0158055 | 0.2442760 | 0.0691796 | 5.00E-06 |
| robust  | PD_mortality | psychencode | ENSG00000170608 | FOXA3      | 3675 | 8.53E-05 | 7.61E-01 | 2.50E-05 | 0.2228881 | 0.0157527 | 0.2386407 | 0.0706752 | 5.00E-06 |
| robust  | PD_mortality | psychencode | ENSG00000187244 | BCAM       | 3339 | 8.79E-05 | 7.84E-01 | 2.25E-05 | 0.2007213 | 0.0153335 | 0.2160548 | 0.0763918 | 5.00E-06 |
| robust  | PD_mortality | psychencode | ENSG00000255652 |            | 3056 | 2.83E-03 | 7.34E-01 | 9.52E-04 | 0.2470781 | 0.0149963 | 0.2620743 | 0.0606945 | 5.00E-06 |
| robust  | PD_mortality | psychencode | ENSG00000267346 | EIF5AP3    | 3455 | 8.74E-05 | 7.80E-01 | 2.30E-05 | 0.2053997 | 0.0147278 | 0.2201275 | 0.0717031 | 5.00E-06 |

|         |              |             |                 |           |      |          |          |          |           |           |           |           |          |
|---------|--------------|-------------|-----------------|-----------|------|----------|----------|----------|-----------|-----------|-----------|-----------|----------|
| robust  | PD_mortality | psychencode | ENSG00000130203 | APOE      | 3323 | 9.14E-05 | 8.15E-01 | 1.91E-05 | 0.1699970 | 0.0146487 | 0.1846457 | 0.0861704 | 5.00E-06 |
| robust  | PD_mortality | psychencode | ENSG00000267545 |           | 3494 | 8.87E-05 | 7.91E-01 | 2.18E-05 | 0.1946439 | 0.0146008 | 0.2092447 | 0.0750130 | 5.00E-06 |
| robust  | PD_mortality | psychencode | ENSG00000267188 |           | 3408 | 8.57E-05 | 7.64E-01 | 2.49E-05 | 0.2215812 | 0.0145013 | 0.2360826 | 0.0654448 | 5.00E-06 |
| liberal | PD_mortality | psychencode | ENSG00000257643 |           | 4147 | 1.40E-03 | 3.63E-01 | 2.38E-03 | 0.6183969 | 0.0144604 | 0.6328573 | 0.0233836 | 1.00E-05 |
| robust  | PD_mortality | psychencode | ENSG00000266958 |           | 3500 | 8.50E-05 | 7.58E-01 | 2.55E-05 | 0.2271775 | 0.0144392 | 0.2416167 | 0.0635592 | 5.00E-06 |
| robust  | PD_mortality | psychencode | ENSG00000230666 | CEACAM22P | 3417 | 8.47E-05 | 7.56E-01 | 2.58E-05 | 0.2298858 | 0.0143733 | 0.2442591 | 0.0625238 | 5.00E-06 |
| robust  | PD_mortality | psychencode | ENSG00000267590 | NDUFA3P1  | 3539 | 8.72E-05 | 7.77E-01 | 2.33E-05 | 0.2081172 | 0.0142834 | 0.2224007 | 0.0686317 | 5.00E-06 |
| robust  | PD_mortality | psychencode | ENSG00000167380 | ZNF226    | 3446 | 2.05E-05 | 1.83E-01 | 9.00E-05 | 0.8026748 | 0.0142462 | 0.8169211 | 0.0177485 | 5.00E-06 |
| robust  | PD_mortality | psychencode | ENSG00000131115 | ZNF227    | 3482 | 8.81E-05 | 7.86E-01 | 2.24E-05 | 0.1995840 | 0.0142431 | 0.2138271 | 0.0713640 | 5.00E-06 |
| robust  | PD_mortality | psychencode | ENSG00000269148 |           | 3744 | 8.33E-05 | 7.43E-01 | 2.72E-05 | 0.2429900 | 0.0142002 | 0.2571901 | 0.0584394 | 5.00E-06 |
| robust  | PD_mortality | psychencode | ENSG00000214855 | APOC1P1   | 3362 | 4.53E-05 | 4.04E-01 | 6.53E-05 | 0.5822043 | 0.0138526 | 0.5960568 | 0.0237933 | 5.00E-06 |
| robust  | PD_mortality | psychencode | ENSG00000267757 | C19orf83  | 3763 | 8.59E-05 | 7.66E-01 | 2.46E-05 | 0.2197315 | 0.0138387 | 0.2335702 | 0.0629802 | 5.00E-06 |
| robust  | PD_mortality | psychencode | ENSG00000267037 |           | 3457 | 8.71E-05 | 7.77E-01 | 2.35E-05 | 0.2092656 | 0.0137897 | 0.2230553 | 0.0658955 | 5.00E-06 |
| robust  | PD_mortality | psychencode | ENSG00000256294 | ZNF225    | 3450 | 8.55E-05 | 7.62E-01 | 2.51E-05 | 0.2236699 | 0.0137863 | 0.2374562 | 0.0616367 | 5.00E-06 |
| robust  | PD_mortality | psychencode | ENSG00000265842 | RN7SL53P  | 3443 | 8.59E-05 | 7.66E-01 | 2.46E-05 | 0.2197397 | 0.0137659 | 0.2335056 | 0.0626463 | 5.00E-06 |
| robust  | PD_mortality | psychencode | ENSG00000259605 |           | 3689 | 8.65E-05 | 7.72E-01 | 2.40E-05 | 0.2142358 | 0.0137468 | 0.2279827 | 0.0641669 | 5.00E-06 |
| robust  | PD_mortality | psychencode | ENSG00000267282 |           | 3311 | 8.49E-05 | 7.57E-01 | 2.57E-05 | 0.2290810 | 0.0135913 | 0.2426722 | 0.0593296 | 5.00E-06 |
| robust  | PD_mortality | psychencode | ENSG00000177045 | SIX5      | 3693 | 8.53E-05 | 7.61E-01 | 2.53E-05 | 0.2257823 | 0.0135855 | 0.2393678 | 0.0601707 | 5.00E-06 |
| robust  | PD_mortality | psychencode | ENSG00000267045 |           | 3577 | 8.37E-05 | 7.47E-01 | 2.69E-05 | 0.2398014 | 0.0134873 | 0.2532887 | 0.0562437 | 5.00E-06 |
| liberal | PD_mortality | eQTLGen     | ENSG00000269148 |           | 5467 | 5.06E-05 | 6.66E-01 | 2.43E-05 | 0.3200690 | 0.0134804 | 0.3335494 | 0.0421172 | 1.00E-05 |
| robust  | PD_mortality | psychencode | ENSG00000268434 |           | 3719 | 8.54E-05 | 7.62E-01 | 2.52E-05 | 0.2247362 | 0.0132744 | 0.2380105 | 0.0590664 | 5.00E-06 |
| robust  | PD_mortality | psychencode | ENSG00000125740 | FOSB      | 3720 | 8.76E-05 | 7.81E-01 | 2.30E-05 | 0.2053035 | 0.0132236 | 0.2185271 | 0.0644103 | 5.00E-06 |
| liberal | PD_mortality | psychencode | ENSG00000006459 | KDM7A     | 2342 | 5.34E-04 | 1.16E-01 | 3.98E-03 | 0.8660023 | 0.0131675 | 0.8791698 | 0.0152049 | 1.00E-05 |
| robust  | PD_mortality | psychencode | ENSG00000267044 |           | 3462 | 8.84E-05 | 7.88E-01 | 2.23E-05 | 0.1984903 | 0.0131539 | 0.2116442 | 0.0662695 | 5.00E-06 |
| robust  | PD_mortality | psychencode | ENSG00000245482 |           | 3388 | 2.42E-03 | 6.29E-01 | 1.36E-03 | 0.3537356 | 0.0131383 | 0.3668738 | 0.0371415 | 5.00E-06 |
| robust  | PD_mortality | eQTLGen     | ENSG00000167384 | ZNF180    | 5445 | 3.24E-05 | 4.26E-01 | 4.26E-05 | 0.5605371 | 0.0131011 | 0.5736382 | 0.0233724 | 5.00E-06 |
| robust  | PD_mortality | psychencode | ENSG00000177464 | GPR4      | 3763 | 8.67E-05 | 7.73E-01 | 2.39E-05 | 0.2135588 | 0.0130846 | 0.2266434 | 0.0612694 | 5.00E-06 |
| robust  | PD_mortality | psychencode | ENSG00000069399 | BCL3      | 3410 | 7.99E-05 | 7.13E-01 | 3.07E-05 | 0.2741744 | 0.0129988 | 0.2871731 | 0.0474106 | 5.00E-06 |
| robust  | PD_mortality | psychencode | ENSG00000130201 | EXOC3L2   | 3543 | 8.65E-05 | 7.71E-01 | 2.42E-05 | 0.2158444 | 0.0129224 | 0.2287668 | 0.0598691 | 5.00E-06 |
| robust  | PD_mortality | psychencode | ENSG00000267163 |           | 3453 | 8.04E-05 | 7.17E-01 | 3.03E-05 | 0.2698445 | 0.0129192 | 0.2827636 | 0.0478763 | 5.00E-06 |
| robust  | PD_mortality | psychencode | ENSG00000104884 | ERCC2     | 3699 | 8.66E-05 | 7.72E-01 | 2.41E-05 | 0.2148501 | 0.0128953 | 0.2277453 | 0.0600199 | 5.00E-06 |
| robust  | PD_mortality | psychencode | ENSG00000057294 | PKP2      | 4046 | 2.46E-03 | 6.38E-01 | 1.33E-03 | 0.3453985 | 0.0128185 | 0.3582170 | 0.0371121 | 5.00E-06 |
| robust  | PD_mortality | psychencode | ENSG00000130204 | TOMM40    | 3313 | 7.91E-05 | 7.05E-01 | 3.16E-05 | 0.2817926 | 0.0127555 | 0.2945481 | 0.0452657 | 5.00E-06 |
| robust  | PD_mortality | psychencode | ENSG00000267395 |           | 3689 | 8.67E-05 | 7.74E-01 | 2.39E-05 | 0.2134552 | 0.0127276 | 0.2261828 | 0.0596267 | 5.00E-06 |

|         |              |             |                 |            |      |          |          |          |           |           |           |           |          |
|---------|--------------|-------------|-----------------|------------|------|----------|----------|----------|-----------|-----------|-----------|-----------|----------|
| robust  | PD_mortality | psychencode | ENSG00000104879 | CKM        | 3741 | 7.72E-05 | 6.88E-01 | 3.35E-05 | 0.2988785 | 0.0127200 | 0.3115985 | 0.0425590 | 5.00E-06 |
| robust  | PD_mortality | psychencode | ENSG00000177051 | FBXO46     | 3709 | 7.04E-05 | 6.28E-01 | 4.03E-05 | 0.3593114 | 0.0127030 | 0.3720144 | 0.0353539 | 5.00E-06 |
| robust  | PD_mortality | psychencode | ENSG00000267467 | APOC4      | 3336 | 8.33E-05 | 7.43E-01 | 2.74E-05 | 0.2439983 | 0.0125654 | 0.2565637 | 0.0514981 | 5.00E-06 |
| robust  | PD_mortality | psychencode | ENSG00000104853 | CLPTM1     | 3304 | 7.35E-05 | 6.55E-01 | 3.72E-05 | 0.3321856 | 0.0125136 | 0.3446993 | 0.0376706 | 5.00E-06 |
| robust  | PD_mortality | psychencode | ENSG00000104866 | PPP1R37    | 3385 | 7.78E-05 | 6.94E-01 | 3.29E-05 | 0.2933980 | 0.0124825 | 0.3058805 | 0.0425446 | 5.00E-06 |
| robust  | PD_mortality | psychencode | ENSG00000268341 |            | 3734 | 5.06E-05 | 4.51E-01 | 6.02E-05 | 0.5370092 | 0.0115734 | 0.5485826 | 0.0215516 | 5.00E-06 |
| liberal | PD_mortality | psychencode | ENSG00000122778 | KIAA1549   | 2945 | 7.79E-04 | 1.74E-01 | 3.63E-03 | 0.8106804 | 0.0110927 | 0.8217731 | 0.0136832 | 1.00E-05 |
| robust  | PD_mortality | psychencode | ENSG00000263002 | ZNF234     | 3437 | 7.00E-05 | 6.24E-01 | 4.09E-05 | 0.3648015 | 0.0108707 | 0.3756722 | 0.0297990 | 5.00E-06 |
| robust  | PD_mortality | psychencode | ENSG00000170684 | ZNF296     | 3325 | 6.15E-05 | 5.49E-01 | 4.94E-05 | 0.4404781 | 0.0105043 | 0.4509825 | 0.0238476 | 5.00E-06 |
| robust  | PD_mortality | psychencode | ENSG00000257511 |            | 4156 | 1.96E-03 | 5.10E-01 | 1.83E-03 | 0.4759727 | 0.0104778 | 0.4864504 | 0.0220134 | 5.00E-06 |
| robust  | PD_mortality | psychencode | ENSG00000267242 |            | 3419 | 6.95E-05 | 6.20E-01 | 4.15E-05 | 0.3700697 | 0.0102382 | 0.3803080 | 0.0276657 | 5.00E-06 |
| robust  | PD_mortality | eQTLGen     | ENSG00000159905 | ZNF221     | 5645 | 2.96E-05 | 3.90E-01 | 4.55E-05 | 0.5996460 | 0.0098867 | 0.6095327 | 0.0164875 | 5.00E-06 |
| robust  | PD_mortality | eQTLGen     | ENSG00000207003 | RNU6-611P  | 5140 | 5.95E-05 | 7.84E-01 | 1.57E-05 | 0.2066292 | 0.0096331 | 0.2162623 | 0.0466204 | 5.00E-06 |
| robust  | PD_mortality | psychencode | ENSG00000178386 | ZNF223     | 3437 | 6.13E-05 | 5.47E-01 | 4.97E-05 | 0.4434402 | 0.0095012 | 0.4529414 | 0.0214261 | 5.00E-06 |
| robust  | PD_mortality | psychencode | ENSG00000186019 |            | 3447 | 4.82E-05 | 4.30E-01 | 6.29E-05 | 0.5606074 | 0.0091540 | 0.5697614 | 0.0163288 | 5.00E-06 |
| robust  | PD_mortality | psychencode | ENSG00000117877 | CD3EAP     | 3672 | 4.51E-06 | 4.02E-02 | 1.07E-04 | 0.9505487 | 0.0091137 | 0.9596624 | 0.0095879 | 5.00E-06 |
| robust  | PD_mortality | psychencode | ENSG00000179846 | NKPD1      | 3462 | 2.46E-05 | 2.19E-01 | 8.65E-05 | 0.7718062 | 0.0090334 | 0.7808396 | 0.0117042 | 5.00E-06 |
| liberal | PD_mortality | eQTLGen     | ENSG00000130204 | TOMM40     | 5199 | 5.04E-06 | 6.65E-02 | 7.02E-05 | 0.9245588 | 0.0089147 | 0.9334735 | 0.0096421 | 1.00E-05 |
| robust  | PD_mortality | eQTLGen     | ENSG00000267163 |            | 5420 | 5.62E-05 | 7.41E-01 | 1.90E-05 | 0.2504372 | 0.0088152 | 0.2592525 | 0.0351994 | 5.00E-06 |
| robust  | PD_mortality | psychencode | ENSG00000130208 | APOC1      | 3337 | 2.17E-05 | 1.93E-01 | 8.95E-05 | 0.7978499 | 0.0086768 | 0.8065268 | 0.0108753 | 5.00E-06 |
| liberal | PD_mortality | eQTLGen     | ENSG00000130203 | APOE       | 5224 | 6.72E-05 | 8.86E-01 | 8.00E-06 | 0.1053352 | 0.0085487 | 0.1138838 | 0.0811568 | 1.00E-05 |
| robust  | PD_mortality | eQTLGen     | ENSG00000267114 |            | 5172 | 5.34E-05 | 7.04E-01 | 2.18E-05 | 0.2871943 | 0.0084911 | 0.2956854 | 0.0295655 | 5.00E-06 |
| robust  | PD_mortality | eQTLGen     | ENSG00000240889 | NDUFB2-AS1 | 4206 | 8.19E-04 | 6.64E-01 | 4.03E-04 | 0.3265116 | 0.0084325 | 0.3349441 | 0.0258259 | 5.00E-06 |
| liberal | PD_mortality | psychencode | ENSG00000125743 | SNRPD2     | 3752 | 2.60E-05 | 2.32E-01 | 8.52E-05 | 0.7595849 | 0.0080891 | 0.7676741 | 0.0106494 | 1.00E-05 |
| robust  | PD_mortality | psychencode | ENSG00000257643 |            | 4147 | 1.41E-03 | 3.66E-01 | 2.40E-03 | 0.6229006 | 0.0072828 | 0.6301835 | 0.0116918 | 5.00E-06 |
| liberal | PD_mortality | psychencode | ENSG00000267191 |            | 3230 | 2.35E-03 | 1.80E-01 | 1.05E-02 | 0.8000156 | 0.0069749 | 0.8069905 | 0.0087185 | 1.00E-05 |
| robust  | PD_mortality | eQTLGen     | ENSG00000269148 |            | 5467 | 5.09E-05 | 6.71E-01 | 2.45E-05 | 0.3222409 | 0.0067859 | 0.3290269 | 0.0210586 | 5.00E-06 |
| robust  | PD_mortality | psychencode | ENSG00000006459 | KDM7A      | 2342 | 5.38E-04 | 1.17E-01 | 4.00E-03 | 0.8717416 | 0.0066274 | 0.8783690 | 0.0076025 | 5.00E-06 |
| liberal | PD_mortality | psychencode | ENSG00000011478 | QPCTL      | 3752 | 2.24E-05 | 2.00E-01 | 8.90E-05 | 0.7934213 | 0.0065772 | 0.7999984 | 0.0082897 | 1.00E-05 |
| liberal | PD_mortality | eQTLGen     | ENSG00000062370 | ZNF112     | 5505 | 6.01E-05 | 7.92E-01 | 1.53E-05 | 0.2018508 | 0.0063935 | 0.2082443 | 0.0316746 | 1.00E-05 |
| liberal | PD_mortality | psychencode | ENSG00000269955 | LUC7L2     | 2867 | 2.06E-04 | 4.54E-02 | 4.28E-03 | 0.9438250 | 0.0062445 | 0.9500696 | 0.0066162 | 1.00E-05 |
| robust  | PD_mortality | psychencode | ENSG00000122778 | KIAA1549   | 2945 | 7.83E-04 | 1.75E-01 | 3.65E-03 | 0.8152018 | 0.0055773 | 0.8207791 | 0.0068416 | 5.00E-06 |
| liberal | PD_mortality | eQTLGen     | ENSG00000259605 |            | 5438 | 1.45E-05 | 1.91E-01 | 6.10E-05 | 0.8041051 | 0.0052452 | 0.8093504 | 0.0065231 | 1.00E-05 |
| robust  | PD_mortality | eQTLGen     | ENSG00000130204 | TOMM40     | 5199 | 5.07E-06 | 6.67E-02 | 7.05E-05 | 0.9286983 | 0.0044773 | 0.9331756 | 0.0048210 | 5.00E-06 |

|         |              |             |                 |             |      |          |          |          |           |           |           |           |          |
|---------|--------------|-------------|-----------------|-------------|------|----------|----------|----------|-----------|-----------|-----------|-----------|----------|
| robust  | PD_mortality | eQTLGen     | ENSG00000130203 | APOE        | 5224 | 6.75E-05 | 8.90E-01 | 8.03E-06 | 0.1057874 | 0.0042927 | 0.1100800 | 0.0405784 | 5.00E-06 |
| liberal | PD_mortality | psychencode | ENSG00000139132 | FGD4        | 4456 | 6.34E-10 | 7.54E-09 | 7.72E-02 | 0.9185712 | 0.0042371 | 0.9228083 | 0.0046127 | 1.00E-05 |
| liberal | PD_mortality | psychencode | ENSG00000176222 | ZNF404      | 3208 | 1.95E-78 | 6.59E-78 | 2.27E-01 | 0.7687265 | 0.0040727 | 0.7727992 | 0.0052979 | 1.00E-05 |
| robust  | PD_mortality | psychencode | ENSG00000125743 | SNRPD2      | 3752 | 2.61E-05 | 2.33E-01 | 8.55E-05 | 0.7626696 | 0.0040610 | 0.7667306 | 0.0053247 | 5.00E-06 |
| robust  | PD_mortality | psychencode | ENSG00000267191 |             | 3230 | 2.36E-03 | 1.81E-01 | 1.05E-02 | 0.8028153 | 0.0034997 | 0.8063150 | 0.0043592 | 5.00E-06 |
| robust  | PD_mortality | psychencode | ENSG00000011478 | QPCTL       | 3752 | 2.25E-05 | 2.01E-01 | 8.92E-05 | 0.7960391 | 0.0032994 | 0.7993386 | 0.0041448 | 5.00E-06 |
| robust  | PD_mortality | eQTLGen     | ENSG00000062370 | ZNF112      | 5505 | 6.03E-05 | 7.94E-01 | 1.54E-05 | 0.2024981 | 0.0032070 | 0.2057051 | 0.0158373 | 5.00E-06 |
| robust  | PD_mortality | psychencode | ENSG00000269955 | LUC7L2      | 2867 | 2.07E-04 | 4.56E-02 | 4.29E-03 | 0.9467811 | 0.0031320 | 0.9499132 | 0.0033081 | 5.00E-06 |
| liberal | PD_mortality | psychencode | ENSG00000224916 | APOC4-APOC2 | 3336 | 8.82E-06 | 7.86E-02 | 1.03E-04 | 0.9181665 | 0.0030848 | 0.9212513 | 0.0033598 | 1.00E-05 |
| robust  | PD_mortality | eQTLGen     | ENSG00000259605 |             | 5438 | 1.45E-05 | 1.91E-01 | 6.12E-05 | 0.8062196 | 0.0026295 | 0.8088491 | 0.0032615 | 5.00E-06 |
| robust  | PD_mortality | psychencode | ENSG00000139132 | FGD4        | 4456 | 6.35E-10 | 7.56E-09 | 7.74E-02 | 0.9205214 | 0.0021230 | 0.9226445 | 0.0023064 | 5.00E-06 |
| robust  | PD_mortality | psychencode | ENSG00000176222 | ZNF404      | 3208 | 1.95E-78 | 6.60E-78 | 2.28E-01 | 0.7702951 | 0.0020405 | 0.7723356 | 0.0026490 | 5.00E-06 |
| liberal | PD_mortality | eQTLGen     | ENSG00000267395 |             | 5420 | 4.21E-06 | 5.54E-02 | 7.15E-05 | 0.9427055 | 0.0017904 | 0.9444959 | 0.0018992 | 1.00E-05 |
| robust  | PD_mortality | psychencode | ENSG00000224916 | APOC4-APOC2 | 3336 | 8.83E-06 | 7.88E-02 | 1.03E-04 | 0.9195848 | 0.0015448 | 0.9211296 | 0.0016799 | 5.00E-06 |
| liberal | PD_mortality | psychencode | ENSG00000267022 |             | 3417 | 6.64E-07 | 5.92E-03 | 1.11E-04 | 0.9925240 | 0.0014420 | 0.9939660 | 0.0014529 | 1.00E-05 |
| liberal | PD_mortality | eQTLGen     | ENSG00000170684 | ZNF296      | 5241 | 1.42E-05 | 1.87E-01 | 6.16E-05 | 0.8118766 | 0.0014389 | 0.8133156 | 0.0017724 | 1.00E-05 |
| liberal | PD_mortality | psychencode | ENSG00000105939 | ZC3HAV1     | 2979 | 6.24E-05 | 1.39E-02 | 4.39E-03 | 0.9802102 | 0.0014243 | 0.9816345 | 0.0014531 | 1.00E-05 |
| liberal | PD_mortality | psychencode | ENSG00000236807 |             | 3399 | 4.13E-06 | 3.69E-02 | 1.08E-04 | 0.9617898 | 0.0012276 | 0.9630174 | 0.0012764 | 1.00E-05 |
| liberal | PD_mortality | psychencode | ENSG00000176761 | ZNF285B     | 3416 | 3.08E-06 | 2.75E-02 | 1.09E-04 | 0.9713194 | 0.0011068 | 0.9724262 | 0.0011395 | 1.00E-05 |
| robust  | PD_mortality | eQTLGen     | ENSG00000267395 |             | 5420 | 4.21E-06 | 5.55E-02 | 7.16E-05 | 0.9435502 | 0.0008960 | 0.9444461 | 0.0009496 | 5.00E-06 |
| liberal | PD_mortality | eQTLGen     | ENSG00000124459 | ZNF45       | 5715 | 7.30E-06 | 9.63E-02 | 6.84E-05 | 0.9027858 | 0.0007939 | 0.9035797 | 0.0008794 | 1.00E-05 |
| liberal | PD_mortality | psychencode | ENSG00000125744 | RTN2        | 3718 | 1.92E-06 | 1.71E-02 | 1.10E-04 | 0.9819939 | 0.0007932 | 0.9827871 | 0.0008078 | 1.00E-05 |
| robust  | PD_mortality | psychencode | ENSG00000267022 |             | 3417 | 6.64E-07 | 5.93E-03 | 1.11E-04 | 0.9932402 | 0.0007215 | 0.9939617 | 0.0007264 | 5.00E-06 |
| robust  | PD_mortality | eQTLGen     | ENSG00000170684 | ZNF296      | 5241 | 1.42E-05 | 1.87E-01 | 6.17E-05 | 0.8124612 | 0.0007200 | 0.8131812 | 0.0008862 | 5.00E-06 |
| robust  | PD_mortality | psychencode | ENSG00000105939 | ZC3HAV1     | 2979 | 6.24E-05 | 1.39E-02 | 4.40E-03 | 0.9809087 | 0.0007127 | 0.9816214 | 0.0007265 | 5.00E-06 |
| robust  | PD_mortality | psychencode | ENSG00000236807 |             | 3399 | 4.14E-06 | 3.69E-02 | 1.08E-04 | 0.9623805 | 0.0006142 | 0.9629947 | 0.0006382 | 5.00E-06 |
| liberal | PD_mortality | eQTLGen     | ENSG00000125741 | OPA3        | 5639 | 5.55E-06 | 7.32E-02 | 7.03E-05 | 0.9261552 | 0.0005998 | 0.9267549 | 0.0006476 | 1.00E-05 |
| liberal | PD_mortality | eQTLGen     | ENSG00000176222 | ZNF404      | 5731 | 5.25E-98 | 1.60E-96 | 3.17E-02 | 0.9677501 | 0.0005656 | 0.9683157 | 0.0005845 | 1.00E-05 |
| robust  | PD_mortality | psychencode | ENSG00000176761 | ZNF285B     | 3416 | 3.08E-06 | 2.75E-02 | 1.09E-04 | 0.9718572 | 0.0005537 | 0.9724110 | 0.0005698 | 5.00E-06 |
| liberal | PD_mortality | eQTLGen     | ENSG00000139132 | FGD4        | 6454 | 2.20E-27 | 7.16E-25 | 3.06E-03 | 0.9963916 | 0.0005458 | 0.9969374 | 0.0005478 | 1.00E-05 |
| robust  | PD_mortality | eQTLGen     | ENSG00000124459 | ZNF45       | 5715 | 7.31E-06 | 9.64E-02 | 6.85E-05 | 0.9031443 | 0.0003971 | 0.9035415 | 0.0004397 | 5.00E-06 |
| robust  | PD_mortality | psychencode | ENSG00000125744 | RTN2        | 3718 | 1.92E-06 | 1.71E-02 | 1.10E-04 | 0.9823835 | 0.0003968 | 0.9827803 | 0.0004039 | 5.00E-06 |
| liberal | PD_mortality | eQTLGen     | ENSG00000257511 |             | 6187 | 1.68E-06 | 6.95E-04 | 2.41E-03 | 0.9965574 | 0.0003390 | 0.9968963 | 0.0003401 | 1.00E-05 |
| robust  | PD_mortality | eQTLGen     | ENSG00000125741 | OPA3        | 5639 | 5.55E-06 | 7.32E-02 | 7.03E-05 | 0.9264330 | 0.0003000 | 0.9267329 | 0.0003238 | 5.00E-06 |

|         |              |             |                 |            |      |          |          |          |           |           |           |           |          |
|---------|--------------|-------------|-----------------|------------|------|----------|----------|----------|-----------|-----------|-----------|-----------|----------|
| robust  | PD_mortality | eQTLGen     | ENSG00000176222 | ZNF404     | 5731 | 5.25E-98 | 1.60E-96 | 3.17E-02 | 0.9680239 | 0.0002829 | 0.9683068 | 0.0002922 | 5.00E-06 |
| liberal | PD_mortality | eQTLGen     | ENSG00000258794 |            | 3993 | 3.72E-06 | 1.54E-03 | 2.40E-03 | 0.9957768 | 0.0002755 | 0.9960523 | 0.0002767 | 1.00E-05 |
| robust  | PD_mortality | eQTLGen     | ENSG00000139132 | FGD4       | 6454 | 2.20E-27 | 7.17E-25 | 3.06E-03 | 0.9966636 | 0.0002730 | 0.9969366 | 0.0002739 | 5.00E-06 |
| liberal | PD_mortality | psychencode | ENSG00000090266 | NDUFB2     | 2328 | 3.42E-09 | 7.37E-07 | 4.62E-03 | 0.9951230 | 0.0002531 | 0.9953761 | 0.0002543 | 1.00E-05 |
| liberal | PD_mortality | eQTLGen     | ENSG00000159885 | ZNF222     | 5542 | 1.02E-06 | 1.34E-02 | 7.48E-05 | 0.9862726 | 0.0002450 | 0.9865176 | 0.0002484 | 1.00E-05 |
| liberal | PD_mortality | psychencode | ENSG00000267058 |            | 3230 | 1.89E-23 | 1.45E-21 | 1.29E-02 | 0.9868956 | 0.0002124 | 0.9871080 | 0.0002152 | 1.00E-05 |
| liberal | PD_mortality | eQTLGen     | ENSG00000157741 | UBN2       | 4973 | 1.87E-08 | 1.55E-05 | 1.21E-03 | 0.9985659 | 0.0002121 | 0.9987780 | 0.0002124 | 1.00E-05 |
| liberal | PD_mortality | psychencode | ENSG00000256538 |            | 3403 | 2.46E-08 | 6.39E-06 | 3.84E-03 | 0.9959596 | 0.0001987 | 0.9961582 | 0.0001995 | 1.00E-05 |
| liberal | PD_mortality | eQTLGen     | ENSG00000139131 | YARS2      | 6191 | 4.32E-07 | 1.79E-04 | 2.41E-03 | 0.9972145 | 0.0001975 | 0.9974120 | 0.0001981 | 1.00E-05 |
| liberal | PD_mortality | psychencode | ENSG00000125755 | SYMPK      | 3741 | 4.72E-07 | 4.21E-03 | 1.12E-04 | 0.9954810 | 0.0001971 | 0.9956781 | 0.0001980 | 1.00E-05 |
| liberal | PD_mortality | psychencode | ENSG00000164898 | C7orf55    | 2870 | 4.12E-06 | 9.10E-04 | 4.50E-03 | 0.9943872 | 0.0001942 | 0.9945814 | 0.0001953 | 1.00E-05 |
| robust  | PD_mortality | eQTLGen     | ENSG00000257511 |            | 6187 | 1.68E-06 | 6.95E-04 | 2.41E-03 | 0.9967263 | 0.0001695 | 0.9968958 | 0.0001701 | 5.00E-06 |
| liberal | PD_mortality | eQTLGen     | ENSG00000146955 | RAB19      | 4440 | 8.94E-06 | 7.30E-03 | 1.21E-03 | 0.9913085 | 0.0001668 | 0.9914753 | 0.0001683 | 1.00E-05 |
| liberal | PD_mortality | psychencode | ENSG00000188883 | KLRG2      | 2797 | 1.38E-11 | 3.02E-09 | 4.57E-03 | 0.9952720 | 0.0001627 | 0.9954347 | 0.0001635 | 1.00E-05 |
| liberal | PD_mortality | psychencode | ENSG00000133597 | ADCK2      | 2320 | 9.07E-27 | 1.95E-24 | 4.62E-03 | 0.9952198 | 0.0001565 | 0.9953763 | 0.0001573 | 1.00E-05 |
| liberal | PD_mortality | psychencode | ENSG00000157800 | SLC37A3    | 2491 | 5.55E-07 | 1.20E-04 | 4.60E-03 | 0.9951439 | 0.0001399 | 0.9952837 | 0.0001405 | 1.00E-05 |
| robust  | PD_mortality | eQTLGen     | ENSG00000258794 |            | 3993 | 3.72E-06 | 1.54E-03 | 2.40E-03 | 0.9959139 | 0.0001378 | 0.9960517 | 0.0001383 | 5.00E-06 |
| robust  | PD_mortality | psychencode | ENSG00000090266 | NDUFB2     | 2328 | 3.42E-09 | 7.37E-07 | 4.62E-03 | 0.9952490 | 0.0001265 | 0.9953755 | 0.0001272 | 5.00E-06 |
| robust  | PD_mortality | eQTLGen     | ENSG00000159885 | ZNF222     | 5542 | 1.02E-06 | 1.34E-02 | 7.48E-05 | 0.9863935 | 0.0001225 | 0.9865160 | 0.0001242 | 5.00E-06 |
| liberal | PD_mortality | eQTLGen     | ENSG00000267058 |            | 5719 | 1.08E-39 | 1.54E-37 | 6.99E-03 | 0.9928893 | 0.0001181 | 0.9930074 | 0.0001189 | 1.00E-05 |
| liberal | PD_mortality | psychencode | ENSG00000139133 | ALG10      | 3445 | 1.86E-10 | 4.83E-08 | 3.84E-03 | 0.9960510 | 0.0001132 | 0.9961643 | 0.0001137 | 1.00E-05 |
| liberal | PD_mortality | psychencode | ENSG00000133606 | MKRN1      | 2418 | 2.18E-06 | 4.70E-04 | 4.60E-03 | 0.9948167 | 0.0001064 | 0.9949231 | 0.0001069 | 1.00E-05 |
| liberal | PD_mortality | psychencode | ENSG00000146966 | DENND2A    | 2361 | 1.38E-15 | 2.98E-13 | 4.62E-03 | 0.9952781 | 0.0001063 | 0.9953844 | 0.0001068 | 1.00E-05 |
| robust  | PD_mortality | psychencode | ENSG00000267058 |            | 3230 | 1.89E-23 | 1.45E-21 | 1.29E-02 | 0.9870005 | 0.0001062 | 0.9871067 | 0.0001076 | 5.00E-06 |
| robust  | PD_mortality | eQTLGen     | ENSG00000157741 | UBN2       | 4973 | 1.87E-08 | 1.55E-05 | 1.21E-03 | 0.9986718 | 0.0001061 | 0.9987779 | 0.0001062 | 5.00E-06 |
| liberal | PD_mortality | eQTLGen     | ENSG00000159915 | ZNF233     | 5599 | 9.77E-07 | 1.29E-02 | 7.49E-05 | 0.9869473 | 0.0001026 | 0.9870499 | 0.0001039 | 1.00E-05 |
| liberal | PD_mortality | psychencode | ENSG00000259937 |            | 3947 | 7.30E-14 | 1.90E-11 | 3.84E-03 | 0.9960643 | 0.0001005 | 0.9961648 | 0.0001009 | 1.00E-05 |
| liberal | PD_mortality | psychencode | ENSG00000260231 | JHDM1D-AS1 | 2343 | 2.71E-18 | 5.91E-16 | 4.57E-03 | 0.9953285 | 0.0001001 | 0.9954286 | 0.0001006 | 1.00E-05 |
| robust  | PD_mortality | psychencode | ENSG00000256538 |            | 3403 | 2.46E-08 | 6.39E-06 | 3.84E-03 | 0.9960585 | 0.0000994 | 0.9961579 | 0.0000997 | 5.00E-06 |
| robust  | PD_mortality | eQTLGen     | ENSG00000139131 | YARS2      | 6191 | 4.32E-07 | 1.79E-04 | 2.41E-03 | 0.9973130 | 0.0000988 | 0.9974118 | 0.0000990 | 5.00E-06 |
| liberal | PD_mortality | psychencode | ENSG00000256070 |            | 3964 | 4.11E-09 | 1.07E-06 | 3.84E-03 | 0.9960653 | 0.0000985 | 0.9961638 | 0.0000989 | 1.00E-05 |
| robust  | PD_mortality | psychencode | ENSG00000125755 | SYMPK      | 3741 | 4.72E-07 | 4.21E-03 | 1.12E-04 | 0.9955791 | 0.0000985 | 0.9956776 | 0.0000990 | 5.00E-06 |
| robust  | PD_mortality | psychencode | ENSG00000164898 | C7orf55    | 2870 | 4.12E-06 | 9.10E-04 | 4.50E-03 | 0.9944838 | 0.0000971 | 0.9945809 | 0.0000976 | 5.00E-06 |
| liberal | PD_mortality | psychencode | ENSG00000110975 | SYT10      | 3970 | 3.23E-46 | 8.38E-44 | 3.84E-03 | 0.9960703 | 0.0000946 | 0.9961649 | 0.0000949 | 1.00E-05 |

|         |              |             |                 |                |      |           |           |          |           |           |           |           |          |
|---------|--------------|-------------|-----------------|----------------|------|-----------|-----------|----------|-----------|-----------|-----------|-----------|----------|
| liberal | PD_mortality | psychencode | ENSG00000258794 |                | 3067 | 6.00E-17  | 1.56E-14  | 3.84E-03 | 0.9960697 | 0.0000933 | 0.9961631 | 0.0000937 | 1.00E-05 |
| liberal | PD_mortality | psychencode | ENSG00000186026 | ZNF284         | 3423 | 2.28E-07  | 2.03E-03  | 1.12E-04 | 0.9977648 | 0.0000901 | 0.9978549 | 0.0000903 | 1.00E-05 |
| liberal | PD_mortality | eQTLGen     | ENSG00000176761 | ZNF285B        | 5417 | 4.44E-07  | 5.85E-03  | 7.55E-05 | 0.9939909 | 0.0000874 | 0.9940783 | 0.0000879 | 1.00E-05 |
| robust  | PD_mortality | eQTLGen     | ENSG00000146955 | RAB19          | 4440 | 8.94E-06  | 7.30E-03  | 1.21E-03 | 0.9913912 | 0.0000834 | 0.9914746 | 0.0000841 | 5.00E-06 |
| robust  | PD_mortality | psychencode | ENSG00000188883 | KLRG2          | 2797 | 1.38E-11  | 3.02E-09  | 4.57E-03 | 0.9953530 | 0.0000814 | 0.9954343 | 0.0000817 | 5.00E-06 |
| liberal | PD_mortality | eQTLGen     | ENSG00000069399 | BCL3           | 5346 | 4.62E-07  | 6.08E-03  | 7.54E-05 | 0.9937609 | 0.0000801 | 0.9938410 | 0.0000806 | 1.00E-05 |
| liberal | PD_mortality | eQTLGen     | ENSG00000146963 | C7orf55-LUC7L2 | 5045 | 5.44E-07  | 4.47E-04  | 1.21E-03 | 0.9982588 | 0.0000796 | 0.9983384 | 0.0000797 | 1.00E-05 |
| robust  | PD_mortality | psychencode | ENSG00000133597 | ADCK2          | 2320 | 9.07E-27  | 1.95E-24  | 4.62E-03 | 0.9952977 | 0.0000783 | 0.9953759 | 0.0000786 | 5.00E-06 |
| liberal | PD_mortality | psychencode | ENSG00000062370 | ZNF112         | 3509 | 2.09E-07  | 1.87E-03  | 1.12E-04 | 0.9979462 | 0.0000762 | 0.9980224 | 0.0000763 | 1.00E-05 |
| liberal | PD_mortality | eQTLGen     | ENSG00000139133 | ALG10          | 4513 | 9.79E-45  | 4.06E-42  | 2.41E-03 | 0.9975212 | 0.0000717 | 0.9975929 | 0.0000719 | 1.00E-05 |
| robust  | PD_mortality | psychencode | ENSG00000157800 | SLC37A3        | 2491 | 5.55E-07  | 1.20E-04  | 4.60E-03 | 0.9952134 | 0.0000699 | 0.9952834 | 0.0000703 | 5.00E-06 |
| liberal | PD_mortality | eQTLGen     | ENSG00000105939 | ZC3HAV1        | 5168 | 8.05E-90  | 6.71E-87  | 1.20E-03 | 0.9987371 | 0.0000649 | 0.9988020 | 0.0000649 | 1.00E-05 |
| liberal | PD_mortality | eQTLGen     | ENSG00000133597 | ADCK2          | 4199 | 1.82E-305 | 1.47E-302 | 1.23E-03 | 0.9987046 | 0.0000633 | 0.9987679 | 0.0000634 | 1.00E-05 |
| liberal | PD_mortality | eQTLGen     | ENSG00000105948 | TTC26          | 5112 | 1.69E-161 | 1.41E-158 | 1.20E-03 | 0.9987379 | 0.0000614 | 0.9987993 | 0.0000615 | 1.00E-05 |
| robust  | PD_mortality | eQTLGen     | ENSG00000267058 |                | 5719 | 1.08E-39  | 1.54E-37  | 6.99E-03 | 0.9929479 | 0.0000590 | 0.9930070 | 0.0000595 | 5.00E-06 |
| robust  | PD_mortality | psychencode | ENSG00000139133 | ALG10          | 3445 | 1.86E-10  | 4.83E-08  | 3.84E-03 | 0.9961074 | 0.0000566 | 0.9961641 | 0.0000568 | 5.00E-06 |
| liberal | PD_mortality | eQTLGen     | ENSG00000087470 | DNM1L          | 6223 | 1.24E-68  | 5.13E-66  | 2.41E-03 | 0.9975365 | 0.0000548 | 0.9975914 | 0.0000550 | 1.00E-05 |
| liberal | PD_mortality | eQTLGen     | ENSG00000133606 | MKRN1          | 4384 | 1.12E-16  | 9.12E-14  | 1.22E-03 | 0.9987223 | 0.0000543 | 0.9987765 | 0.0000543 | 1.00E-05 |
| liberal | PD_mortality | eQTLGen     | ENSG00000164898 | C7orf55        | 5034 | 1.92E-25  | 1.58E-22  | 1.21E-03 | 0.9987371 | 0.0000535 | 0.9987906 | 0.0000536 | 1.00E-05 |
| liberal | PD_mortality | eQTLGen     | ENSG00000260231 | JHDM1D-AS1     | 4317 | 3.19E-88  | 2.61E-85  | 1.22E-03 | 0.9987258 | 0.0000533 | 0.9987791 | 0.0000533 | 1.00E-05 |
| robust  | PD_mortality | psychencode | ENSG00000133606 | MKRN1          | 2418 | 2.18E-06  | 4.70E-04  | 4.60E-03 | 0.9948696 | 0.0000532 | 0.9949228 | 0.0000535 | 5.00E-06 |
| robust  | PD_mortality | psychencode | ENSG00000146966 | DENND2A        | 2361 | 1.38E-15  | 2.98E-13  | 4.62E-03 | 0.9953310 | 0.0000532 | 0.9953842 | 0.0000534 | 5.00E-06 |
| liberal | PD_mortality | eQTLGen     | ENSG00000157764 | BRAF           | 4190 | 7.08E-08  | 5.71E-05  | 1.24E-03 | 0.9986537 | 0.0000521 | 0.9987058 | 0.0000522 | 1.00E-05 |
| robust  | PD_mortality | eQTLGen     | ENSG00000159915 | ZNF233         | 5599 | 9.77E-07  | 1.29E-02  | 7.49E-05 | 0.9869979 | 0.0000513 | 0.9870492 | 0.0000520 | 5.00E-06 |
| robust  | PD_mortality | psychencode | ENSG00000259937 |                | 3947 | 7.30E-14  | 1.90E-11  | 3.84E-03 | 0.9961144 | 0.0000503 | 0.9961646 | 0.0000505 | 5.00E-06 |
| robust  | PD_mortality | psychencode | ENSG00000260231 | JHDM1D-AS1     | 2343 | 2.71E-18  | 5.91E-16  | 4.57E-03 | 0.9953783 | 0.0000501 | 0.9954284 | 0.0000503 | 5.00E-06 |
| robust  | PD_mortality | psychencode | ENSG00000256070 |                | 3964 | 4.11E-09  | 1.07E-06  | 3.84E-03 | 0.9961144 | 0.0000493 | 0.9961636 | 0.0000495 | 5.00E-06 |
| liberal | PD_mortality | eQTLGen     | ENSG00000236279 | CLEC2L         | 5074 | 1.30E-37  | 1.06E-34  | 1.22E-03 | 0.9987323 | 0.0000483 | 0.9987807 | 0.0000484 | 1.00E-05 |
| robust  | PD_mortality | psychencode | ENSG00000110975 | SYT10          | 3970 | 3.23E-46  | 8.38E-44  | 3.84E-03 | 0.9961174 | 0.0000473 | 0.9961647 | 0.0000475 | 5.00E-06 |
| robust  | PD_mortality | psychencode | ENSG00000258794 |                | 3067 | 6.00E-17  | 1.56E-14  | 3.84E-03 | 0.9961162 | 0.0000467 | 0.9961629 | 0.0000469 | 5.00E-06 |
| robust  | PD_mortality | psychencode | ENSG00000186026 | ZNF284         | 3423 | 2.28E-07  | 2.03E-03  | 1.12E-04 | 0.9978098 | 0.0000450 | 0.9978548 | 0.0000451 | 5.00E-06 |
| robust  | PD_mortality | eQTLGen     | ENSG00000176761 | ZNF285B        | 5417 | 4.44E-07  | 5.85E-03  | 7.55E-05 | 0.9940343 | 0.0000437 | 0.9940780 | 0.0000440 | 5.00E-06 |
| robust  | PD_mortality | eQTLGen     | ENSG00000069399 | BCL3           | 5346 | 4.62E-07  | 6.08E-03  | 7.54E-05 | 0.9938007 | 0.0000400 | 0.9938407 | 0.0000403 | 5.00E-06 |
| robust  | PD_mortality | eQTLGen     | ENSG00000146963 | C7orf55-LUC7L2 | 5045 | 5.44E-07  | 4.47E-04  | 1.21E-03 | 0.9982985 | 0.0000398 | 0.9983383 | 0.0000399 | 5.00E-06 |

|         |              |             |                 |            |      |           |           |          |           |           |           |           |          |
|---------|--------------|-------------|-----------------|------------|------|-----------|-----------|----------|-----------|-----------|-----------|-----------|----------|
| robust  | PD_mortality | psychencode | ENSG0000062370  | ZNF112     | 3509 | 2.09E-07  | 1.87E-03  | 1.12E-04 | 0.9979842 | 0.0000381 | 0.9980223 | 0.0000382 | 5.00E-06 |
| liberal | PD_mortality | psychencode | ENSG00000167383 | ZNF229     | 3408 | 1.18E-07  | 1.05E-03  | 1.12E-04 | 0.9988014 | 0.0000368 | 0.9988383 | 0.0000369 | 1.00E-05 |
| robust  | PD_mortality | eQTLGen     | ENSG00000139133 | ALG10      | 4513 | 9.79E-45  | 4.06E-42  | 2.41E-03 | 0.9975570 | 0.0000359 | 0.9975928 | 0.0000360 | 5.00E-06 |
| liberal | PD_mortality | eQTLGen     | ENSG00000057294 | PKP2       | 6166 | 1.35E-102 | 5.61E-100 | 2.41E-03 | 0.9975564 | 0.0000358 | 0.9975922 | 0.0000359 | 1.00E-05 |
| liberal | PD_mortality | eQTLGen     | ENSG00000170604 | IRF2BP1    | 5372 | 3.16E-07  | 4.16E-03  | 7.56E-05 | 0.9957313 | 0.0000343 | 0.9957656 | 0.0000344 | 1.00E-05 |
| robust  | PD_mortality | eQTLGen     | ENSG00000105939 | ZC3HAV1    | 5168 | 8.05E-90  | 6.71E-87  | 1.20E-03 | 0.9987695 | 0.0000324 | 0.9988019 | 0.0000325 | 5.00E-06 |
| robust  | PD_mortality | eQTLGen     | ENSG00000133597 | ADCK2      | 4199 | 1.82E-305 | 1.47E-302 | 1.23E-03 | 0.9987362 | 0.0000317 | 0.9987679 | 0.0000317 | 5.00E-06 |
| robust  | PD_mortality | eQTLGen     | ENSG00000105948 | TTC26      | 5112 | 1.69E-161 | 1.41E-158 | 1.20E-03 | 0.9987686 | 0.0000307 | 0.9987993 | 0.0000307 | 5.00E-06 |
| liberal | PD_mortality | psychencode | ENSG00000104936 | DMPK       | 3720 | 1.52E-08  | 1.36E-04  | 1.12E-04 | 0.9997233 | 0.0000286 | 0.9997519 | 0.0000286 | 1.00E-05 |
| liberal | PD_mortality | eQTLGen     | ENSG00000059377 | TBXAS1     | 4674 | 3.06E-263 | 2.51E-260 | 1.22E-03 | 0.9987544 | 0.0000278 | 0.9987822 | 0.0000279 | 1.00E-05 |
| robust  | PD_mortality | eQTLGen     | ENSG00000087470 | DNM1L      | 6223 | 1.24E-68  | 5.13E-66  | 2.41E-03 | 0.9975639 | 0.0000274 | 0.9975913 | 0.0000275 | 5.00E-06 |
| robust  | PD_mortality | eQTLGen     | ENSG00000133606 | MKRN1      | 4384 | 1.12E-16  | 9.12E-14  | 1.22E-03 | 0.9987494 | 0.0000271 | 0.9987765 | 0.0000272 | 5.00E-06 |
| robust  | PD_mortality | eQTLGen     | ENSG00000164898 | C7orf55    | 5034 | 1.92E-25  | 1.58E-22  | 1.21E-03 | 0.9987638 | 0.0000268 | 0.9987906 | 0.0000268 | 5.00E-06 |
| robust  | PD_mortality | eQTLGen     | ENSG00000260231 | JHDM1D-AS1 | 4317 | 3.19E-88  | 2.61E-85  | 1.22E-03 | 0.9987524 | 0.0000266 | 0.9987791 | 0.0000267 | 5.00E-06 |
| robust  | PD_mortality | eQTLGen     | ENSG00000157764 | BRAF       | 4190 | 7.08E-08  | 5.71E-05  | 1.24E-03 | 0.9986797 | 0.0000261 | 0.9987058 | 0.0000261 | 5.00E-06 |
| robust  | PD_mortality | eQTLGen     | ENSG00000236279 | CLEC2L     | 5074 | 1.30E-37  | 1.06E-34  | 1.22E-03 | 0.9987565 | 0.0000242 | 0.9987806 | 0.0000242 | 5.00E-06 |
| liberal | PD_mortality | eQTLGen     | ENSG00000090266 | NDUFB2     | 4212 | 6.40E-306 | 5.18E-303 | 1.23E-03 | 0.9987441 | 0.0000235 | 0.9987676 | 0.0000235 | 1.00E-05 |
| liberal | PD_mortality | eQTLGen     | ENSG00000157800 | SLC37A3    | 4502 | 1.48E-299 | 1.21E-296 | 1.22E-03 | 0.9987521 | 0.0000229 | 0.9987750 | 0.0000229 | 1.00E-05 |
| liberal | PD_mortality | psychencode | ENSG00000167384 | ZNF180     | 3427 | 6.31E-22  | 5.63E-18  | 1.12E-04 | 0.9998653 | 0.0000226 | 0.9998879 | 0.0000226 | 1.00E-05 |
| liberal | PD_mortality | eQTLGen     | ENSG00000064393 | HIPK2      | 5038 | 7.77E-15  | 6.35E-12  | 1.22E-03 | 0.9987559 | 0.0000226 | 0.9987784 | 0.0000226 | 1.00E-05 |
| liberal | PD_mortality | eQTLGen     | ENSG00000229677 |            | 5107 | 9.73E-14  | 8.11E-11  | 1.20E-03 | 0.9987803 | 0.0000221 | 0.9988024 | 0.0000221 | 1.00E-05 |
| liberal | PD_mortality | eQTLGen     | ENSG00000104856 | RELB       | 5188 | 9.30E-09  | 1.23E-04  | 7.59E-05 | 0.9997802 | 0.0000214 | 0.9998016 | 0.0000214 | 1.00E-05 |
| liberal | PD_mortality | psychencode | ENSG00000125746 | EML2       | 3763 | 5.74E-08  | 5.12E-04  | 1.12E-04 | 0.9993571 | 0.0000189 | 0.9993760 | 0.0000189 | 1.00E-05 |
| robust  | PD_mortality | psychencode | ENSG00000167383 | ZNF229     | 3408 | 1.18E-07  | 1.05E-03  | 1.12E-04 | 0.9988198 | 0.0000184 | 0.9988383 | 0.0000184 | 5.00E-06 |
| robust  | PD_mortality | eQTLGen     | ENSG00000057294 | PKP2       | 6166 | 1.35E-102 | 5.61E-100 | 2.41E-03 | 0.9975743 | 0.0000179 | 0.9975922 | 0.0000179 | 5.00E-06 |
| liberal | PD_mortality | eQTLGen     | ENSG00000178386 | ZNF223     | 5499 | 4.22E-66  | 5.57E-62  | 7.59E-05 | 0.9999064 | 0.0000178 | 0.9999241 | 0.0000178 | 1.00E-05 |
| liberal | PD_mortality | eQTLGen     | ENSG00000186026 | ZNF284     | 5425 | 9.96E-34  | 1.31E-29  | 7.59E-05 | 0.9999064 | 0.0000177 | 0.9999241 | 0.0000177 | 1.00E-05 |
| robust  | PD_mortality | eQTLGen     | ENSG00000170604 | IRF2BP1    | 5372 | 3.16E-07  | 4.16E-03  | 7.56E-05 | 0.9957484 | 0.0000171 | 0.9957655 | 0.0000172 | 5.00E-06 |
| liberal | PD_mortality | eQTLGen     | ENSG00000146858 | ZC3HAV1L   | 5105 | 1.17E-21  | 9.78E-19  | 1.20E-03 | 0.9987865 | 0.0000164 | 0.9988030 | 0.0000164 | 1.00E-05 |
| liberal | PD_mortality | eQTLGen     | ENSG00000059378 | PARP12     | 4448 | 9.93E-27  | 8.12E-24  | 1.22E-03 | 0.9987631 | 0.0000159 | 0.9987791 | 0.0000160 | 1.00E-05 |
| liberal | PD_mortality | eQTLGen     | ENSG00000006459 | KDM7A      | 4370 | 8.63E-43  | 7.06E-40  | 1.22E-03 | 0.9987641 | 0.0000154 | 0.9987795 | 0.0000154 | 1.00E-05 |
| liberal | PD_mortality | psychencode | ENSG00000159882 | ZNF230     | 3387 | 4.12E-12  | 3.67E-08  | 1.12E-04 | 0.9998728 | 0.0000151 | 0.9998879 | 0.0000151 | 1.00E-05 |
| robust  | PD_mortality | psychencode | ENSG00000104936 | DMPK       | 3720 | 1.52E-08  | 1.36E-04  | 1.12E-04 | 0.9997376 | 0.0000143 | 0.9997519 | 0.0000143 | 5.00E-06 |
| robust  | PD_mortality | eQTLGen     | ENSG00000059377 | TBXAS1     | 4674 | 3.06E-263 | 2.51E-260 | 1.22E-03 | 0.9987683 | 0.0000139 | 0.9987822 | 0.0000139 | 5.00E-06 |



|         |              |             |                 |          |      |           |           |          |           |           |           |           |          |
|---------|--------------|-------------|-----------------|----------|------|-----------|-----------|----------|-----------|-----------|-----------|-----------|----------|
| liberal | PD_mortality | eQTLGen     | ENSG00000267680 | ZNF224   | 5455 | 4.37E-91  | 5.75E-87  | 7.59E-05 | 0.9999121 | 0.0000120 | 0.9999241 | 0.0000120 | 1.00E-05 |
| robust  | PD_mortality | eQTLGen     | ENSG00000090266 | NDUFB2   | 4212 | 6.40E-306 | 5.18E-303 | 1.23E-03 | 0.9987558 | 0.0000117 | 0.9987676 | 0.0000118 | 5.00E-06 |
| robust  | PD_mortality | eQTLGen     | ENSG00000157800 | SLC37A3  | 4502 | 1.48E-299 | 1.21E-296 | 1.23E-03 | 0.9987635 | 0.0000114 | 0.9987750 | 0.0000115 | 5.00E-06 |
| robust  | PD_mortality | psychencode | ENSG00000167384 | ZNF180   | 3427 | 6.31E-22  | 5.63E-18  | 1.12E-04 | 0.9998766 | 0.0000113 | 0.9998879 | 0.0000113 | 5.00E-06 |
| robust  | PD_mortality | eQTLGen     | ENSG00000064393 | HIPK2    | 5038 | 7.77E-15  | 6.35E-12  | 1.22E-03 | 0.9987671 | 0.0000113 | 0.9987784 | 0.0000113 | 5.00E-06 |
| robust  | PD_mortality | eQTLGen     | ENSG00000229677 |          | 5107 | 9.73E-14  | 8.11E-11  | 1.20E-03 | 0.9987913 | 0.0000110 | 0.9988024 | 0.0000111 | 5.00E-06 |
| robust  | PD_mortality | eQTLGen     | ENSG00000104856 | RELB     | 5188 | 9.30E-09  | 1.23E-04  | 7.59E-05 | 0.9997909 | 0.0000107 | 0.9998016 | 0.0000107 | 5.00E-06 |
| robust  | PD_mortality | psychencode | ENSG00000125746 | EML2     | 3763 | 5.74E-08  | 5.12E-04  | 1.12E-04 | 0.9993665 | 0.0000094 | 0.9993759 | 0.0000094 | 5.00E-06 |
| robust  | PD_mortality | eQTLGen     | ENSG00000178386 | ZNF223   | 5499 | 4.22E-66  | 5.57E-62  | 7.59E-05 | 0.9999153 | 0.0000089 | 0.9999241 | 0.0000089 | 5.00E-06 |
| robust  | PD_mortality | eQTLGen     | ENSG00000186026 | ZNF284   | 5425 | 9.96E-34  | 1.31E-29  | 7.59E-05 | 0.9999153 | 0.0000089 | 0.9999241 | 0.0000089 | 5.00E-06 |
| liberal | PD_mortality | psychencode | ENSG00000170604 | IRF2BP1  | 3639 | 9.32E-09  | 8.31E-05  | 1.12E-04 | 0.9997959 | 0.0000089 | 0.9998048 | 0.0000089 | 1.00E-05 |
| liberal | PD_mortality | eQTLGen     | ENSG00000125746 | EML2     | 5603 | 1.59E-10  | 2.09E-06  | 7.59E-05 | 0.9999134 | 0.0000086 | 0.9999220 | 0.0000086 | 1.00E-05 |
| liberal | PD_mortality | psychencode | ENSG00000186567 | CEACAM19 | 3485 | 6.61E-10  | 5.89E-06  | 1.12E-04 | 0.9998734 | 0.0000086 | 0.9998820 | 0.0000086 | 1.00E-05 |
| robust  | PD_mortality | eQTLGen     | ENSG00000146858 | ZC3HAV1L | 5105 | 1.17E-21  | 9.78E-19  | 1.20E-03 | 0.9987947 | 0.0000082 | 0.9988030 | 0.0000082 | 5.00E-06 |
| robust  | PD_mortality | eQTLGen     | ENSG00000059378 | PARP12   | 4448 | 9.93E-27  | 8.12E-24  | 1.22E-03 | 0.9987711 | 0.0000080 | 0.9987791 | 0.0000080 | 5.00E-06 |
| liberal | PD_mortality | psychencode | ENSG00000130202 | PVRL2    | 3285 | 2.33E-26  | 2.08E-22  | 1.12E-04 | 0.9998799 | 0.0000080 | 0.9998879 | 0.0000080 | 1.00E-05 |
| robust  | PD_mortality | eQTLGen     | ENSG00000006459 | KDM7A    | 4370 | 8.63E-43  | 7.06E-40  | 1.22E-03 | 0.9987718 | 0.0000077 | 0.9987795 | 0.0000077 | 5.00E-06 |
| robust  | PD_mortality | psychencode | ENSG00000159882 | ZNF230   | 3387 | 4.12E-12  | 3.67E-08  | 1.12E-04 | 0.9998804 | 0.0000075 | 0.9998879 | 0.0000075 | 5.00E-06 |
| liberal | PD_mortality | eQTLGen     | ENSG00000167383 | ZNF229   | 5467 | 3.37E-08  | 4.44E-04  | 7.59E-05 | 0.9994723 | 0.0000074 | 0.9994797 | 0.0000074 | 1.00E-05 |
| liberal | PD_mortality | eQTLGen     | ENSG00000167380 | ZNF226   | 5419 | 1.04E-22  | 1.37E-18  | 7.59E-05 | 0.9999176 | 0.0000065 | 0.9999241 | 0.0000065 | 1.00E-05 |
| liberal | PD_mortality | eQTLGen     | ENSG00000267242 |          | 5430 | 1.92E-36  | 2.53E-32  | 7.59E-05 | 0.9999177 | 0.0000064 | 0.9999241 | 0.0000064 | 1.00E-05 |
| liberal | PD_mortality | psychencode | ENSG00000266903 |          | 3411 | 1.08E-82  | 9.67E-79  | 1.12E-04 | 0.9998818 | 0.0000061 | 0.9998879 | 0.0000061 | 1.00E-05 |
| robust  | PD_mortality | eQTLGen     | ENSG00000267680 | ZNF224   | 5455 | 4.37E-91  | 5.75E-87  | 7.59E-05 | 0.9999181 | 0.0000060 | 0.9999241 | 0.0000060 | 5.00E-06 |
| liberal | PD_mortality | eQTLGen     | ENSG00000256294 | ZNF225   | 5442 | 1.46E-13  | 1.92E-09  | 7.59E-05 | 0.9999184 | 0.0000057 | 0.9999241 | 0.0000057 | 1.00E-05 |
| liberal | PD_mortality | eQTLGen     | ENSG00000186567 | CEACAM19 | 5491 | 6.03E-38  | 7.94E-34  | 7.59E-05 | 0.9999187 | 0.0000054 | 0.9999241 | 0.0000054 | 1.00E-05 |
| liberal | PD_mortality | eQTLGen     | ENSG00000159882 | ZNF230   | 5565 | 3.89E-21  | 5.13E-17  | 7.58E-05 | 0.9999193 | 0.0000049 | 0.9999242 | 0.0000049 | 1.00E-05 |
| liberal | PD_mortality | psychencode | ENSG00000124459 | ZNF45    | 3267 | 8.33E-09  | 7.43E-05  | 1.12E-04 | 0.9998090 | 0.0000046 | 0.9998136 | 0.0000046 | 1.00E-05 |
| liberal | PD_mortality | eQTLGen     | ENSG00000131115 | ZNF227   | 5518 | 2.36E-32  | 3.11E-28  | 7.59E-05 | 0.9999196 | 0.0000045 | 0.9999241 | 0.0000045 | 1.00E-05 |
| robust  | PD_mortality | psychencode | ENSG00000170604 | IRF2BP1  | 3639 | 9.32E-09  | 8.31E-05  | 1.12E-04 | 0.9998003 | 0.0000044 | 0.9998048 | 0.0000044 | 5.00E-06 |
| robust  | PD_mortality | eQTLGen     | ENSG00000125746 | EML2     | 5603 | 1.59E-10  | 2.09E-06  | 7.59E-05 | 0.9999177 | 0.0000043 | 0.9999220 | 0.0000043 | 5.00E-06 |
| robust  | PD_mortality | psychencode | ENSG00000186567 | CEACAM19 | 3485 | 6.61E-10  | 5.89E-06  | 1.12E-04 | 0.9998777 | 0.0000043 | 0.9998820 | 0.0000043 | 5.00E-06 |
| liberal | PD_mortality | eQTLGen     | ENSG00000159917 | ZNF235   | 5591 | 8.04E-48  | 1.06E-43  | 7.59E-05 | 0.9999199 | 0.0000042 | 0.9999241 | 0.0000042 | 1.00E-05 |
| robust  | PD_mortality | psychencode | ENSG00000130202 | PVRL2    | 3285 | 2.33E-26  | 2.08E-22  | 1.12E-04 | 0.9998839 | 0.0000040 | 0.9998879 | 0.0000040 | 5.00E-06 |
| robust  | PD_mortality | eQTLGen     | ENSG00000167383 | ZNF229   | 5467 | 3.37E-08  | 4.44E-04  | 7.59E-05 | 0.9994760 | 0.0000037 | 0.9994797 | 0.0000037 | 5.00E-06 |

|         |              |             |                 |          |      |           |           |          |           |           |           |           |          |
|---------|--------------|-------------|-----------------|----------|------|-----------|-----------|----------|-----------|-----------|-----------|-----------|----------|
| liberal | PD_mortality | psychencode | ENSG00000159915 | ZNF233   | 3606 | 8.72E-11  | 7.77E-07  | 1.12E-04 | 0.9998835 | 0.0000036 | 0.9998871 | 0.0000036 | 1.00E-05 |
| liberal | PD_mortality | eQTLGen     | ENSG00000104853 | CLPTM1   | 5189 | 2.37E-12  | 3.12E-08  | 7.59E-05 | 0.9999206 | 0.0000035 | 0.9999241 | 0.0000035 | 1.00E-05 |
| liberal | PD_mortality | psychencode | ENSG0000010310  | GIPR     | 3765 | 1.49E-09  | 1.33E-05  | 1.12E-04 | 0.9998711 | 0.0000035 | 0.9998746 | 0.0000035 | 1.00E-05 |
| liberal | PD_mortality | psychencode | ENSG00000159905 | ZNF221   | 3303 | 4.29E-09  | 3.83E-05  | 1.12E-04 | 0.9998462 | 0.0000034 | 0.9998496 | 0.0000034 | 1.00E-05 |
| liberal | PD_mortality | psychencode | ENSG00000104892 | KLC3     | 3744 | 1.79E-34  | 1.60E-30  | 1.12E-04 | 0.9998846 | 0.0000033 | 0.9998879 | 0.0000033 | 1.00E-05 |
| robust  | PD_mortality | eQTLGen     | ENSG00000167380 | ZNF226   | 5419 | 1.04E-22  | 1.37E-18  | 7.59E-05 | 0.9999208 | 0.0000033 | 0.9999241 | 0.0000033 | 5.00E-06 |
| liberal | PD_mortality | eQTLGen     | ENSG00000011478 | QPCTL    | 5580 | 1.64E-28  | 2.16E-24  | 7.59E-05 | 0.9999209 | 0.0000033 | 0.9999241 | 0.0000033 | 1.00E-05 |
| robust  | PD_mortality | eQTLGen     | ENSG00000267242 |          | 5430 | 1.92E-36  | 2.53E-32  | 7.59E-05 | 0.9999209 | 0.0000032 | 0.9999241 | 0.0000032 | 5.00E-06 |
| robust  | PD_mortality | psychencode | ENSG00000266903 |          | 3411 | 1.08E-82  | 9.67E-79  | 1.12E-04 | 0.9998848 | 0.0000031 | 0.9998879 | 0.0000031 | 5.00E-06 |
| liberal | PD_mortality | psychencode | ENSG00000204920 | ZNF155   | 3332 | 9.54E-21  | 8.51E-17  | 1.12E-04 | 0.9998850 | 0.0000029 | 0.9998879 | 0.0000029 | 1.00E-05 |
| robust  | PD_mortality | eQTLGen     | ENSG00000256294 | ZNF225   | 5442 | 1.46E-13  | 1.92E-09  | 7.59E-05 | 0.9999212 | 0.0000029 | 0.9999241 | 0.0000029 | 5.00E-06 |
| liberal | PD_mortality | eQTLGen     | ENSG00000176182 | MYPOP    | 5353 | 4.07E-36  | 5.30E-32  | 7.67E-05 | 0.9999205 | 0.0000028 | 0.9999233 | 0.0000028 | 1.00E-05 |
| robust  | PD_mortality | eQTLGen     | ENSG00000186567 | CEACAM19 | 5491 | 6.03E-38  | 7.94E-34  | 7.59E-05 | 0.9999214 | 0.0000027 | 0.9999241 | 0.0000027 | 5.00E-06 |
| liberal | PD_mortality | psychencode | ENSG00000267508 | ZNF285   | 3480 | 7.85E-10  | 7.00E-06  | 1.12E-04 | 0.9998782 | 0.0000027 | 0.9998809 | 0.0000027 | 1.00E-05 |
| liberal | PD_mortality | psychencode | ENSG00000189114 | BLOC1S3  | 3492 | 2.39E-10  | 2.13E-06  | 1.12E-04 | 0.9998832 | 0.0000025 | 0.9998858 | 0.0000025 | 1.00E-05 |
| robust  | PD_mortality | eQTLGen     | ENSG00000159882 | ZNF230   | 5565 | 3.89E-21  | 5.13E-17  | 7.58E-05 | 0.9999217 | 0.0000025 | 0.9999242 | 0.0000025 | 5.00E-06 |
| liberal | PD_mortality | psychencode | ENSG00000234906 | APOC2    | 3324 | 2.29E-09  | 2.04E-05  | 1.12E-04 | 0.9998651 | 0.0000023 | 0.9998675 | 0.0000023 | 1.00E-05 |
| robust  | PD_mortality | psychencode | ENSG00000124459 | ZNF45    | 3267 | 8.33E-09  | 7.43E-05  | 1.12E-04 | 0.9998113 | 0.0000023 | 0.9998136 | 0.0000023 | 5.00E-06 |
| robust  | PD_mortality | eQTLGen     | ENSG00000131115 | ZNF227   | 5518 | 2.36E-32  | 3.11E-28  | 7.59E-05 | 0.9999218 | 0.0000023 | 0.9999241 | 0.0000023 | 5.00E-06 |
| liberal | PD_mortality | psychencode | ENSG00000142252 | GEMIN7   | 3336 | 6.18E-14  | 5.51E-10  | 1.12E-04 | 0.9998857 | 0.0000022 | 0.9998879 | 0.0000022 | 1.00E-05 |
| liberal | PD_mortality | eQTLGen     | ENSG00000125755 | SYMPK    | 5498 | 3.87E-59  | 5.09E-55  | 7.59E-05 | 0.9999220 | 0.0000021 | 0.9999241 | 0.0000021 | 1.00E-05 |
| robust  | PD_mortality | eQTLGen     | ENSG00000159917 | ZNF235   | 5591 | 8.04E-48  | 1.06E-43  | 7.59E-05 | 0.9999220 | 0.0000021 | 0.9999241 | 0.0000021 | 5.00E-06 |
| liberal | PD_mortality | psychencode | ENSG00000125741 | OPA3     | 3772 | 1.46E-10  | 1.30E-06  | 1.12E-04 | 0.9998845 | 0.0000021 | 0.9998866 | 0.0000021 | 1.00E-05 |
| liberal | PD_mortality | eQTLGen     | ENSG00000073008 | PVR      | 5465 | 1.01E-47  | 1.33E-43  | 7.59E-05 | 0.9999222 | 0.0000019 | 0.9999241 | 0.0000019 | 1.00E-05 |
| liberal | PD_mortality | eQTLGen     | ENSG00000267508 | ZNF285   | 5499 | 1.08E-10  | 1.43E-06  | 7.59E-05 | 0.9999207 | 0.0000019 | 0.9999227 | 0.0000019 | 1.00E-05 |
| robust  | PD_mortality | psychencode | ENSG00000159915 | ZNF233   | 3606 | 8.72E-11  | 7.77E-07  | 1.12E-04 | 0.9998853 | 0.0000018 | 0.9998871 | 0.0000018 | 5.00E-06 |
| liberal | PD_mortality | psychencode | ENSG00000073008 | PVR      | 3449 | 2.13E-56  | 1.90E-52  | 1.12E-04 | 0.9998861 | 0.0000018 | 0.9998879 | 0.0000018 | 1.00E-05 |
| liberal | PD_mortality | eQTLGen     | ENSG00000104892 | KLC3     | 5693 | 1.32E-141 | 1.75E-137 | 7.59E-05 | 0.9999223 | 0.0000018 | 0.9999241 | 0.0000018 | 1.00E-05 |
| liberal | PD_mortality | eQTLGen     | ENSG00000104866 | PPP1R37  | 5334 | 1.80E-83  | 2.37E-79  | 7.59E-05 | 0.9999223 | 0.0000018 | 0.9999241 | 0.0000018 | 1.00E-05 |
| robust  | PD_mortality | eQTLGen     | ENSG00000104853 | CLPTM1   | 5189 | 2.37E-12  | 3.12E-08  | 7.59E-05 | 0.9999223 | 0.0000017 | 0.9999241 | 0.0000017 | 5.00E-06 |
| robust  | PD_mortality | psychencode | ENSG00000010310 | GIPR     | 3765 | 1.49E-09  | 1.33E-05  | 1.12E-04 | 0.9998729 | 0.0000017 | 0.9998746 | 0.0000017 | 5.00E-06 |
| liberal | PD_mortality | eQTLGen     | ENSG00000007255 | TRAPPC6A | 5368 | 2.19E-152 | 2.88E-148 | 7.59E-05 | 0.9999224 | 0.0000017 | 0.9999241 | 0.0000017 | 1.00E-05 |
| liberal | PD_mortality | eQTLGen     | ENSG00000010310 | GIPR     | 5620 | 2.17E-12  | 2.85E-08  | 7.59E-05 | 0.9999224 | 0.0000017 | 0.9999241 | 0.0000017 | 1.00E-05 |
| robust  | PD_mortality | psychencode | ENSG00000159905 | ZNF221   | 3303 | 4.29E-09  | 3.83E-05  | 1.12E-04 | 0.9998479 | 0.0000017 | 0.9998496 | 0.0000017 | 5.00E-06 |

|         |              |             |                 |           |      |           |           |          |           |           |           |           |          |
|---------|--------------|-------------|-----------------|-----------|------|-----------|-----------|----------|-----------|-----------|-----------|-----------|----------|
| liberal | PD_mortality | eQTLGen     | ENSG0000012061  | ERCC1     | 5598 | 4.62E-233 | 6.09E-229 | 7.59E-05 | 0.9999225 | 0.0000017 | 0.9999241 | 0.0000017 | 1.00E-05 |
| robust  | PD_mortality | psychencode | ENSG00000104892 | KLC3      | 3744 | 1.79E-34  | 1.60E-30  | 1.12E-04 | 0.9998862 | 0.0000017 | 0.9998879 | 0.0000017 | 5.00E-06 |
| robust  | PD_mortality | eQTLGen     | ENSG00000011478 | QPCTL     | 5580 | 1.64E-28  | 2.16E-24  | 7.59E-05 | 0.9999225 | 0.0000016 | 0.9999241 | 0.0000016 | 5.00E-06 |
| liberal | PD_mortality | eQTLGen     | ENSG00000179846 | NKPD1     | 5341 | 8.60E-25  | 1.13E-20  | 7.59E-05 | 0.9999225 | 0.0000016 | 0.9999241 | 0.0000016 | 1.00E-05 |
| liberal | PD_mortality | eQTLGen     | ENSG00000189114 | BLOC1S3   | 5385 | 6.55E-45  | 8.63E-41  | 7.59E-05 | 0.9999225 | 0.0000016 | 0.9999241 | 0.0000016 | 1.00E-05 |
| liberal | PD_mortality | eQTLGen     | ENSG00000125744 | RTN2      | 5645 | 9.68E-82  | 1.28E-77  | 7.59E-05 | 0.9999225 | 0.0000016 | 0.9999241 | 0.0000016 | 1.00E-05 |
| liberal | PD_mortality | eQTLGen     | ENSG00000142252 | GEMIN7    | 5285 | 7.90E-45  | 1.04E-40  | 7.59E-05 | 0.9999226 | 0.0000015 | 0.9999241 | 0.0000015 | 1.00E-05 |
| liberal | PD_mortality | eQTLGen     | ENSG00000204920 | ZNF155    | 5576 | 5.22E-305 | 6.89E-301 | 7.58E-05 | 0.9999227 | 0.0000015 | 0.9999242 | 0.0000015 | 1.00E-05 |
| liberal | PD_mortality | psychencode | ENSG00000213889 | PPM1N     | 3737 | 2.42E-14  | 2.15E-10  | 1.12E-04 | 0.9998864 | 0.0000015 | 0.9998879 | 0.0000015 | 1.00E-05 |
| robust  | PD_mortality | psychencode | ENSG00000204920 | ZNF155    | 3332 | 9.54E-21  | 8.51E-17  | 1.12E-04 | 0.9998865 | 0.0000015 | 0.9998879 | 0.0000015 | 5.00E-06 |
| robust  | PD_mortality | eQTLGen     | ENSG00000176182 | MYPOP     | 5353 | 4.07E-36  | 5.30E-32  | 7.67E-05 | 0.9999219 | 0.0000014 | 0.9999233 | 0.0000014 | 5.00E-06 |
| liberal | PD_mortality | eQTLGen     | ENSG00000177051 | FBXO46    | 5544 | 1.35E-13  | 1.78E-09  | 7.59E-05 | 0.9999227 | 0.0000014 | 0.9999241 | 0.0000014 | 1.00E-05 |
| liberal | PD_mortality | eQTLGen     | ENSG00000104881 | PPP1R13L  | 5624 | 3.36E-09  | 4.42E-05  | 7.59E-05 | 0.9998785 | 0.0000014 | 0.9998799 | 0.0000014 | 1.00E-05 |
| liberal | PD_mortality | eQTLGen     | ENSG00000230666 | CEACAM22P | 5422 | 5.31E-181 | 7.00E-177 | 7.59E-05 | 0.9999227 | 0.0000014 | 0.9999241 | 0.0000014 | 1.00E-05 |
| liberal | PD_mortality | eQTLGen     | ENSG00000187244 | BCAM      | 5226 | 8.65E-15  | 1.14E-10  | 7.59E-05 | 0.9999227 | 0.0000014 | 0.9999241 | 0.0000014 | 1.00E-05 |
| robust  | PD_mortality | psychencode | ENSG00000267508 | ZNF285    | 3480 | 7.85E-10  | 7.00E-06  | 1.12E-04 | 0.9998795 | 0.0000013 | 0.9998809 | 0.0000013 | 5.00E-06 |
| liberal | PD_mortality | eQTLGen     | ENSG00000117877 | CD3EAP    | 5585 | 3.02E-33  | 3.98E-29  | 7.59E-05 | 0.9999228 | 0.0000013 | 0.9999241 | 0.0000013 | 1.00E-05 |
| liberal | PD_mortality | eQTLGen     | ENSG00000130202 | PVRL2     | 5175 | 4.01E-308 | 5.29E-304 | 7.59E-05 | 0.9999228 | 0.0000013 | 0.9999241 | 0.0000013 | 1.00E-05 |
| robust  | PD_mortality | psychencode | ENSG00000189114 | BLOC1S3   | 3492 | 2.39E-10  | 2.13E-06  | 1.12E-04 | 0.9998845 | 0.0000013 | 0.9998858 | 0.0000013 | 5.00E-06 |
| liberal | PD_mortality | eQTLGen     | ENSG00000104936 | DMPK      | 5501 | 5.28E-283 | 6.96E-279 | 7.59E-05 | 0.9999229 | 0.0000013 | 0.9999241 | 0.0000013 | 1.00E-05 |
| liberal | PD_mortality | eQTLGen     | ENSG00000125743 | SNRPD2    | 5604 | 1.01E-215 | 1.33E-211 | 7.59E-05 | 0.9999229 | 0.0000013 | 0.9999241 | 0.0000013 | 1.00E-05 |
| liberal | PD_mortality | eQTLGen     | ENSG00000185800 | DMWD      | 5511 | 5.42E-208 | 7.15E-204 | 7.59E-05 | 0.9999229 | 0.0000013 | 0.9999241 | 0.0000013 | 1.00E-05 |
| liberal | PD_mortality | eQTLGen     | ENSG00000104879 | CKM       | 5691 | 1.79E-226 | 2.36E-222 | 7.59E-05 | 0.9999229 | 0.0000012 | 0.9999241 | 0.0000012 | 1.00E-05 |
| liberal | PD_mortality | eQTLGen     | ENSG00000263002 | ZNF234    | 5431 | 9.21E-308 | 1.21E-303 | 7.59E-05 | 0.9999229 | 0.0000012 | 0.9999241 | 0.0000012 | 1.00E-05 |
| liberal | PD_mortality | eQTLGen     | ENSG00000177045 | SIX5      | 5468 | 6.67E-61  | 8.78E-57  | 7.59E-05 | 0.9999229 | 0.0000012 | 0.9999241 | 0.0000012 | 1.00E-05 |
| liberal | PD_mortality | eQTLGen     | ENSG00000104859 | CLASRP    | 5179 | 4.95E-15  | 6.52E-11  | 7.59E-05 | 0.9999229 | 0.0000012 | 0.9999241 | 0.0000012 | 1.00E-05 |
| liberal | PD_mortality | eQTLGen     | ENSG00000130201 | EXOC3L2   | 5429 | 7.83E-15  | 1.03E-10  | 7.59E-05 | 0.9999229 | 0.0000012 | 0.9999241 | 0.0000012 | 1.00E-05 |
| robust  | PD_mortality | psychencode | ENSG00000234906 | APOC2     | 3324 | 2.29E-09  | 2.04E-05  | 1.12E-04 | 0.9998663 | 0.0000012 | 0.9998675 | 0.0000012 | 5.00E-06 |
| liberal | PD_mortality | eQTLGen     | ENSG00000007047 | MARK4     | 5388 | 1.97E-307 | 2.60E-303 | 7.59E-05 | 0.9999230 | 0.0000011 | 0.9999241 | 0.0000011 | 1.00E-05 |
| robust  | PD_mortality | psychencode | ENSG00000142252 | GEMIN7    | 3336 | 6.18E-14  | 5.51E-10  | 1.12E-04 | 0.9998868 | 0.0000011 | 0.9998879 | 0.0000011 | 5.00E-06 |
| liberal | PD_mortality | eQTLGen     | ENSG00000216588 | IGSF23    | 5439 | 2.48E-26  | 3.26E-22  | 7.59E-05 | 0.9999230 | 0.0000011 | 0.9999241 | 0.0000011 | 1.00E-05 |
| liberal | PD_mortality | eQTLGen     | ENSG00000125753 | VASP      | 5638 | 9.18E-308 | 1.21E-303 | 7.59E-05 | 0.9999230 | 0.0000011 | 0.9999241 | 0.0000011 | 1.00E-05 |
| liberal | PD_mortality | eQTLGen     | ENSG00000213889 | PPM1N     | 5610 | 6.95E-96  | 9.16E-92  | 7.59E-05 | 0.9999231 | 0.0000011 | 0.9999241 | 0.0000011 | 1.00E-05 |
| robust  | PD_mortality | eQTLGen     | ENSG00000125755 | SYMPK     | 5498 | 3.87E-59  | 5.09E-55  | 7.59E-05 | 0.9999231 | 0.0000011 | 0.9999241 | 0.0000011 | 5.00E-06 |

|         |              |             |                 |           |      |           |           |                 |           |           |           |           |          |
|---------|--------------|-------------|-----------------|-----------|------|-----------|-----------|-----------------|-----------|-----------|-----------|-----------|----------|
| robust  | PD_mortality | psychencode | ENSG00000125741 | OPA3      | 3772 | 1.46E-10  | 1.30E-06  | 1.12E-04        | 0.9998856 | 0.0000010 | 0.9998866 | 0.0000010 | 5.00E-06 |
| liberal | PD_mortality | eQTLGen     | ENSG00000267348 |           | 5238 | 1.24E-19  | 1.63E-15  | 7.59E-05        | 0.9999231 | 0.0000010 | 0.9999241 | 0.0000010 | 1.00E-05 |
| liberal | PD_mortality | eQTLGen     | ENSG00000125740 | FOSB      | 5629 | 1.69E-11  | 2.23E-07  | 7.59E-05        | 0.9999229 | 0.0000010 | 0.9999239 | 0.0000010 | 1.00E-05 |
| robust  | PD_mortality | eQTLGen     | ENSG00000073008 | PVR       | 5465 | 1.01E-47  | 1.33E-43  | 7.59E-05        | 0.9999231 | 0.0000010 | 0.9999241 | 0.0000010 | 5.00E-06 |
| robust  | PD_mortality | eQTLGen     | ENSG00000267508 | ZNF285    | 5499 | 1.08E-10  | 1.43E-06  | 7.59E-05        | 0.9999217 | 0.0000010 | 0.9999227 | 0.0000010 | 5.00E-06 |
| liberal | PD_mortality | eQTLGen     | ENSG00000104884 | ERCC2     | 5662 | 1.93E-90  | 2.55E-86  | 7.59E-05        | 0.9999232 | 0.0000009 | 0.9999241 | 0.0000009 | 1.00E-05 |
| robust  | PD_mortality | psychencode | ENSG00000073008 | PVR       | 3449 | 2.13E-56  | 1.90E-52  | 1.12E-04        | 0.9998870 | 0.0000009 | 0.9998879 | 0.0000009 | 5.00E-06 |
| robust  | PD_mortality | eQTLGen     | ENSG00000104892 | KLC3      | 5693 | 1.32E-141 | 1.75E-137 | 7.59E-05        | 0.9999232 | 0.0000009 | 0.9999241 | 0.0000009 | 5.00E-06 |
| robust  | PD_mortality | eQTLGen     | ENSG00000104866 | PPP1R37   | 5334 | 1.80E-83  | 2.37E-79  | 7.59E-05        | 0.9999232 | 0.0000009 | 0.9999241 | 0.0000009 | 5.00E-06 |
| robust  | PD_mortality | eQTLGen     | ENSG00000007255 | TRAPPC6A  | 5368 | 2.19E-152 | 2.88E-148 | 7.59E-05        | 0.9999232 | 0.0000009 | 0.9999241 | 0.0000009 | 5.00E-06 |
| robust  | PD_mortality | eQTLGen     | ENSG00000010310 | GIPR      | 5620 | 2.17E-12  | 2.85E-08  | 7.59E-05        | 0.9999232 | 0.0000008 | 0.9999241 | 0.0000008 | 5.00E-06 |
| robust  | PD_mortality | eQTLGen     | ENSG00000012061 | ERCC1     | 5598 | 4.62E-233 | 6.09E-229 | 7.59E-05        | 0.9999233 | 0.0000008 | 0.9999241 | 0.0000008 | 5.00E-06 |
| robust  | PD_mortality | eQTLGen     | ENSG00000179846 | NKPD1     | 5341 | 8.60E-25  | 1.13E-20  | 7.59E-05        | 0.9999233 | 0.0000008 | 0.9999241 | 0.0000008 | 5.00E-06 |
| robust  | PD_mortality | eQTLGen     | ENSG00000189114 | BLOC1S3   | 5385 | 6.55E-45  | 8.64E-41  | 7.59E-05        | 0.9999233 | 0.0000008 | 0.9999241 | 0.0000008 | 5.00E-06 |
| robust  | PD_mortality | eQTLGen     | ENSG00000125744 | RTN2      | 5645 | 9.68E-82  | 1.28E-77  | 7.59E-05        | 0.9999233 | 0.0000008 | 0.9999241 | 0.0000008 | 5.00E-06 |
| robust  | PD_mortality | eQTLGen     | ENSG00000142252 | GEMIN7    | 5285 | 7.90E-45  | 1.04E-40  | 7.59E-05        | 0.9999233 | 0.0000008 | 0.9999241 | 0.0000008 | 5.00E-06 |
| robust  | PD_mortality | eQTLGen     | ENSG00000204920 | ZNF155    | 5576 | 5.22E-305 | 6.89E-301 | 7.58E-05        | 0.9999234 | 0.0000008 | 0.9999242 | 0.0000008 | 5.00E-06 |
| robust  | PD_mortality | psychencode | ENSG00000213889 | PPM1N     | 3737 | 2.42E-14  | 2.15E-10  | 0.0001120<br>97 | 0.9998871 | 0.0000008 | 0.9998879 | 0.0000008 | 5.00E-06 |
| robust  | PD_mortality | eQTLGen     | ENSG00000177051 | FBXO46    | 5544 | 1.35E-13  | 1.78E-09  | 7.59E-05        | 0.9999234 | 0.0000007 | 0.9999241 | 0.0000007 | 5.00E-06 |
| robust  | PD_mortality | eQTLGen     | ENSG00000104881 | PPP1R13L  | 5624 | 3.36E-09  | 4.42E-05  | 7.59E-05        | 0.9998792 | 0.0000007 | 0.9998799 | 0.0000007 | 5.00E-06 |
| robust  | PD_mortality | eQTLGen     | ENSG00000230666 | CEACAM22P | 5422 | 5.31E-181 | 7.00E-177 | 7.59E-05        | 0.9999234 | 0.0000007 | 0.9999241 | 0.0000007 | 5.00E-06 |
| robust  | PD_mortality | eQTLGen     | ENSG00000187244 | BCAM      | 5226 | 8.65E-15  | 1.14E-10  | 7.59E-05        | 0.9999234 | 0.0000007 | 0.9999241 | 0.0000007 | 5.00E-06 |
| robust  | PD_mortality | eQTLGen     | ENSG00000117877 | CD3EAP    | 5585 | 3.02E-33  | 3.98E-29  | 7.59E-05        | 0.9999235 | 0.0000007 | 0.9999241 | 0.0000007 | 5.00E-06 |
| robust  | PD_mortality | eQTLGen     | ENSG00000130202 | PVRL2     | 5175 | 4.01E-308 | 5.29E-304 | 7.59E-05        | 0.9999234 | 0.0000007 | 0.9999241 | 0.0000007 | 5.00E-06 |
| robust  | PD_mortality | eQTLGen     | ENSG00000104936 | DMPK      | 5501 | 5.28E-283 | 6.96E-279 | 7.59E-05        | 0.9999235 | 0.0000006 | 0.9999241 | 0.0000006 | 5.00E-06 |
| robust  | PD_mortality | eQTLGen     | ENSG00000125743 | SNRPD2    | 5604 | 1.01E-215 | 1.33E-211 | 7.59E-05        | 0.9999235 | 0.0000006 | 0.9999241 | 0.0000006 | 5.00E-06 |
| robust  | PD_mortality | eQTLGen     | ENSG00000185800 | DMWD      | 5511 | 5.42E-208 | 7.15E-204 | 7.59E-05        | 0.9999235 | 0.0000006 | 0.9999241 | 0.0000006 | 5.00E-06 |
| robust  | PD_mortality | eQTLGen     | ENSG00000104879 | CKM       | 5691 | 1.79E-226 | 2.36E-222 | 7.59E-05        | 0.9999235 | 0.0000006 | 0.9999241 | 0.0000006 | 5.00E-06 |
| robust  | PD_mortality | eQTLGen     | ENSG00000263002 | ZNF234    | 5431 | 9.21E-308 | 1.21E-303 | 7.59E-05        | 0.9999235 | 0.0000006 | 0.9999241 | 0.0000006 | 5.00E-06 |
| robust  | PD_mortality | eQTLGen     | ENSG00000177045 | SIX5      | 5468 | 6.67E-61  | 8.78E-57  | 7.59E-05        | 0.9999235 | 0.0000006 | 0.9999241 | 0.0000006 | 5.00E-06 |
| robust  | PD_mortality | eQTLGen     | ENSG00000104859 | CLASRP    | 5179 | 4.95E-15  | 6.52E-11  | 7.59E-05        | 0.9999235 | 0.0000006 | 0.9999241 | 0.0000006 | 5.00E-06 |
| robust  | PD_mortality | eQTLGen     | ENSG00000130201 | EXOC3L2   | 5429 | 7.83E-15  | 1.03E-10  | 7.59E-05        | 0.9999235 | 0.0000006 | 0.9999241 | 0.0000006 | 5.00E-06 |
| robust  | PD_mortality | eQTLGen     | ENSG00000007047 | MARK4     | 5388 | 1.97E-307 | 2.60E-303 | 7.59E-05        | 0.9999235 | 0.0000006 | 0.9999241 | 0.0000006 | 5.00E-06 |
| robust  | PD_mortality | eQTLGen     | ENSG00000216588 | IGSF23    | 5439 | 2.48E-26  | 3.26E-22  | 7.59E-05        | 0.9999235 | 0.0000005 | 0.9999241 | 0.0000005 | 5.00E-06 |

|        |              |         |                 |       |      |           |           |          |           |           |           |           |          |
|--------|--------------|---------|-----------------|-------|------|-----------|-----------|----------|-----------|-----------|-----------|-----------|----------|
| robust | PD_mortality | eQTLGen | ENSG00000125753 | VASP  | 5638 | 9.18E-308 | 1.21E-303 | 7.59E-05 | 0.9999236 | 0.0000005 | 0.9999241 | 0.0000005 | 5.00E-06 |
| robust | PD_mortality | eQTLGen | ENSG00000213889 | PPM1N | 5610 | 6.95E-96  | 9.16E-92  | 7.59E-05 | 0.9999236 | 0.0000005 | 0.9999241 | 0.0000005 | 5.00E-06 |
| robust | PD_mortality | eQTLGen | ENSG00000267348 |       | 5238 | 1.24E-19  | 1.63E-15  | 7.59E-05 | 0.9999236 | 0.0000005 | 0.9999241 | 0.0000005 | 5.00E-06 |
| robust | PD_mortality | eQTLGen | ENSG00000125740 | FOSB  | 5629 | 1.69E-11  | 2.23E-07  | 7.59E-05 | 0.9999234 | 0.0000005 | 0.9999239 | 0.0000005 | 5.00E-06 |
| robust | PD_mortality | eQTLGen | ENSG00000104884 | ERCC2 | 5662 | 1.93E-90  | 2.55E-86  | 7.59E-05 | 0.9999237 | 0.0000005 | 0.9999241 | 0.0000005 | 5.00E-06 |

**Supplementary Table 3.** Full colocalisation results for PD H&Y3 and eQTLs in eQTLGen and PsychENCODE.

| prior_t<br>ype | GWAS_1 | dataset     | gene_2          | hgnc_symb<br>ol | nsnps | PP.H0.abf   | PP.H1.abf   | PP.H2.abf | PP.H3.abf | PP.H4.abf | sum_PPH3<br>4 PPH4 | ratio_PPH<br>4 PPH3 | p12      |
|----------------|--------|-------------|-----------------|-----------------|-------|-------------|-------------|-----------|-----------|-----------|--------------------|---------------------|----------|
| liberal        | PD_HY3 | psychencode | ENSG00000162927 | PUS10           | 2632  | 1.42E-20    | 1.00E-20    | 0.1777668 | 0.1241484 | 0.6980847 | 0.8222332          | 5.6229851           | 1.00E-05 |
| liberal        | PD_HY3 | psychencode | ENSG00000237522 | NONOP2          | 2699  | 0.049621127 | 0.03488599  | 0.1831185 | 0.1281367 | 0.6042376 | 0.7323743          | 4.7155695           | 1.00E-05 |
| robust         | PD_HY3 | psychencode | ENSG00000162927 | PUS10           | 2632  | 2.19E-20    | 1.54E-20    | 0.2730851 | 0.1907166 | 0.5361983 | 0.7269149          | 2.8114926           | 5.00E-06 |
| robust         | PD_HY3 | psychencode | ENSG00000237522 | NONOP2          | 2699  | 0.071102543 | 0.049988437 | 0.2623921 | 0.1836082 | 0.4329087 | 0.6165169          | 2.3577847           | 5.00E-06 |
| liberal        | PD_HY3 | eQTLGen     | ENSG00000162924 | REL             | 4328  | 3.95E-53    | 4.75E-52    | 0.0492792 | 0.5917167 | 0.3590041 | 0.9507208          | 0.6067162           | 1.00E-05 |
| liberal        | PD_HY3 | psychencode | ENSG00000177133 | LINC00982       | 2631  | 0.003742761 | 0.423467658 | 0.0019487 | 0.2201278 | 0.3507131 | 0.5708409          | 1.5932253           | 1.00E-05 |
| liberal        | PD_HY3 | eQTLGen     | ENSG00000162927 | PUS10           | 4233  | 8.45E-181   | 1.02E-179   | 0.0584524 | 0.7020047 | 0.2395429 | 0.9415476          | 0.3412269           | 1.00E-05 |
| robust         | PD_HY3 | eQTLGen     | ENSG00000162924 | REL             | 4328  | 4.82E-53    | 5.79E-52    | 0.0600601 | 0.7211678 | 0.2187721 | 0.9399399          | 0.3033581           | 5.00E-06 |
| robust         | PD_HY3 | psychencode | ENSG00000177133 | LINC00982       | 2631  | 0.004538642 | 0.513516074 | 0.0023630 | 0.2669369 | 0.2126453 | 0.4795822          | 0.7966126           | 5.00E-06 |
| liberal        | PD_HY3 | psychencode | ENSG00000142611 | PRDM16          | 2631  | 0.005837132 | 0.66043126  | 0.0010642 | 0.1201892 | 0.2124782 | 0.3326675          | 1.7678638           | 1.00E-05 |
| liberal        | PD_HY3 | psychencode | ENSG00000248333 | CDK11B          | 1239  | 0.006226631 | 0.722160576 | 0.0007126 | 0.0824601 | 0.1884400 | 0.2709002          | 2.2852260           | 1.00E-05 |
| liberal        | PD_HY3 | psychencode | ENSG00000271921 |                 | 1984  | 0.006649391 | 0.751942239 | 0.0008460 | 0.0955291 | 0.1450333 | 0.2405623          | 1.5182112           | 1.00E-05 |
| robust         | PD_HY3 | eQTLGen     | ENSG00000162927 | PUS10           | 4233  | 9.60E-181   | 1.15E-179   | 0.0664059 | 0.7975255 | 0.1360686 | 0.9335941          | 0.1706135           | 5.00E-06 |
| liberal        | PD_HY3 | psychencode | ENSG00000226286 |                 | 2572  | 0.006579451 | 0.744077014 | 0.0011337 | 0.1280933 | 0.1201165 | 0.2482098          | 0.9377262           | 1.00E-05 |
| robust         | PD_HY3 | psychencode | ENSG00000142611 | PRDM16          | 2631  | 0.006530977 | 0.738935059 | 0.0011906 | 0.1344758 | 0.1188675 | 0.2533433          | 0.8839319           | 5.00E-06 |
| liberal        | PD_HY3 | psychencode | ENSG00000272235 |                 | 2761  | 0.006557616 | 0.740758833 | 0.0011889 | 0.1341838 | 0.1173109 | 0.2514946          | 0.8742553           | 1.00E-05 |
| liberal        | PD_HY3 | psychencode | ENSG00000234396 |                 | 1931  | 0.006951817 | 0.787601808 | 0.0008228 | 0.0931118 | 0.1115117 | 0.2046235          | 1.1976107           | 1.00E-05 |
| liberal        | PD_HY3 | psychencode | ENSG00000269737 |                 | 1241  | 0.007053903 | 0.818222442 | 0.0005451 | 0.0631167 | 0.1110619 | 0.1741786          | 1.7596275           | 1.00E-05 |
| liberal        | PD_HY3 | psychencode | ENSG00000243558 |                 | 1931  | 0.006988399 | 0.791746276 | 0.0008110 | 0.0917684 | 0.1086859 | 0.2004544          | 1.1843499           | 1.00E-05 |
| liberal        | PD_HY3 | psychencode | ENSG00000223663 |                 | 867   | 0.013445398 | 0.829160348 | 0.0008199 | 0.0504555 | 0.1061189 | 0.1565744          | 2.1032190           | 1.00E-05 |
| robust         | PD_HY3 | psychencode | ENSG00000248333 | CDK11B          | 1239  | 0.00687433  | 0.797280349 | 0.0007867 | 0.0910377 | 0.1040209 | 0.1950586          | 1.1426130           | 5.00E-06 |
| liberal        | PD_HY3 | psychencode | ENSG00000269227 |                 | 1241  | 0.007003476 | 0.812373131 | 0.0006745 | 0.0781403 | 0.1018086 | 0.1799489          | 1.3028948           | 1.00E-05 |
| liberal        | PD_HY3 | psychencode | ENSG00000157933 | SKI             | 1916  | 0.006672975 | 0.755302264 | 0.0011971 | 0.1353983 | 0.1014294 | 0.2368276          | 0.7491185           | 1.00E-05 |
| liberal        | PD_HY3 | psychencode | ENSG00000242485 | MRPL20          | 894   | 0.00734465  | 0.865677125 | 0.0003719 | 0.0437545 | 0.0828518 | 0.1266063          | 1.8935581           | 1.00E-05 |
| robust         | PD_HY3 | psychencode | ENSG00000271921 |                 | 1984  | 0.007169283 | 0.810733939 | 0.0009122 | 0.1029981 | 0.0781865 | 0.1811846          | 0.7591056           | 5.00E-06 |
| liberal        | PD_HY3 | eQTLGen     | ENSG00000138735 | PDE5A           | 5052  | 2.99E-48    | 5.10E-48    | 0.3411935 | 0.5809776 | 0.0778290 | 0.6588065          | 0.1339621           | 1.00E-05 |
| liberal        | PD_HY3 | psychencode | ENSG00000215014 |                 | 1141  | 0.006905286 | 0.807369503 | 0.0009548 | 0.1115604 | 0.0732100 | 0.1847704          | 0.6562367           | 1.00E-05 |
| liberal        | PD_HY3 | psychencode | ENSG00000228037 |                 | 2142  | 0.006999961 | 0.79301215  | 0.0011194 | 0.1267470 | 0.0721215 | 0.1988685          | 0.5690191           | 1.00E-05 |
| liberal        | PD_HY3 | psychencode | ENSG00000157916 | RER1            | 2025  | 0.007153269 | 0.806891025 | 0.0010043 | 0.1132160 | 0.0717354 | 0.1849514          | 0.6336157           | 1.00E-05 |
| liberal        | PD_HY3 | psychencode | ENSG00000272004 |                 | 1241  | 0.007312145 | 0.848177354 | 0.0006285 | 0.0728364 | 0.0710456 | 0.1438820          | 0.9754131           | 1.00E-05 |

|         |        |             |                 |           |      |             |             |           |           |           |           |           |          |
|---------|--------|-------------|-----------------|-----------|------|-------------|-------------|-----------|-----------|-----------|-----------|-----------|----------|
| liberal | PD_HY3 | psychencode | ENSG00000142609 | C1orf222  | 1503 | 0.007277704 | 0.832659799 | 0.0007782 | 0.0889633 | 0.0703211 | 0.1592843 | 0.7904505 | 1.00E-05 |
| liberal | PD_HY3 | psychencode | ENSG00000225931 |           | 2128 | 0.007181404 | 0.812828381 | 0.0009675 | 0.1094377 | 0.0695850 | 0.1790227 | 0.6358415 | 1.00E-05 |
| liberal | PD_HY3 | psychencode | ENSG00000215791 |           | 1132 | 0.006925042 | 0.810228875 | 0.0009610 | 0.1123660 | 0.0695191 | 0.1818851 | 0.6186850 | 1.00E-05 |
| liberal | PD_HY3 | psychencode | ENSG00000008130 | NADK      | 1267 | 0.007257216 | 0.84390117  | 0.0006822 | 0.0792552 | 0.0689043 | 0.1481595 | 0.8693981 | 1.00E-05 |
| liberal | PD_HY3 | psychencode | ENSG00000189409 | MMP23B    | 1228 | 0.00717052  | 0.831947427 | 0.0007895 | 0.0915275 | 0.0685651 | 0.1600926 | 0.7491208 | 1.00E-05 |
| liberal | PD_HY3 | psychencode | ENSG00000205090 | TMEM240   | 1113 | 0.007404333 | 0.867811428 | 0.0004793 | 0.0561106 | 0.0681943 | 0.1243049 | 1.2153567 | 1.00E-05 |
| liberal | PD_HY3 | psychencode | ENSG00000197530 | MIB2      | 1207 | 0.007062427 | 0.821078679 | 0.0008902 | 0.1034256 | 0.0675431 | 0.1709687 | 0.6530592 | 1.00E-05 |
| liberal | PD_HY3 | psychencode | ENSG00000221978 | CCNL2     | 877  | 0.007294414 | 0.812916173 | 0.0009993 | 0.1112974 | 0.0674927 | 0.1787901 | 0.6064180 | 1.00E-05 |
| liberal | PD_HY3 | psychencode | ENSG00000272455 |           | 894  | 0.007205403 | 0.849264857 | 0.0006417 | 0.0755689 | 0.0673191 | 0.1428880 | 0.8908313 | 1.00E-05 |
| liberal | PD_HY3 | psychencode | ENSG00000180535 | BHLHA15   | 3403 | 7.54E-41    | 5.75E-41    | 0.5295751 | 0.4040879 | 0.0663370 | 0.4704249 | 0.1641648 | 1.00E-05 |
| liberal | PD_HY3 | psychencode | ENSG00000182873 |           | 1925 | 0.006934657 | 0.785988968 | 0.0012332 | 0.1397113 | 0.0661318 | 0.2058431 | 0.4733461 | 1.00E-05 |
| liberal | PD_HY3 | psychencode | ENSG00000179403 | VWA1      | 940  | 0.007444541 | 0.875084355 | 0.0004359 | 0.0511725 | 0.0658627 | 0.1170352 | 1.2870737 | 1.00E-05 |
| robust  | PD_HY3 | psychencode | ENSG00000226286 |           | 2572 | 0.00699985  | 0.791620337 | 0.0012062 | 0.1362780 | 0.0638957 | 0.2001737 | 0.4688631 | 5.00E-06 |
| liberal | PD_HY3 | psychencode | ENSG00000067606 | PRKCZ     | 1719 | 0.007429271 | 0.845381999 | 0.0007277 | 0.0827373 | 0.0637238 | 0.1464611 | 0.7701941 | 1.00E-05 |
| liberal | PD_HY3 | psychencode | ENSG00000233542 |           | 1660 | 0.006626399 | 0.756823231 | 0.0015067 | 0.1720233 | 0.0630203 | 0.2350437 | 0.3663477 | 1.00E-05 |
| liberal | PD_HY3 | psychencode | ENSG00000269753 |           | 1950 | 0.0069466   | 0.786556233 | 0.0012602 | 0.1426277 | 0.0626093 | 0.2052370 | 0.4389700 | 1.00E-05 |
| robust  | PD_HY3 | psychencode | ENSG00000272235 |           | 2761 | 0.006966223 | 0.786915718 | 0.0012630 | 0.1425448 | 0.0623103 | 0.2048551 | 0.4371277 | 5.00E-06 |
| liberal | PD_HY3 | psychencode | ENSG00000225285 |           | 940  | 0.007062591 | 0.830187183 | 0.0008500 | 0.0998566 | 0.0620436 | 0.1619002 | 0.6213271 | 1.00E-05 |
| liberal | PD_HY3 | psychencode | ENSG00000272106 |           | 1208 | 0.007189692 | 0.83579245  | 0.0008117 | 0.0942974 | 0.0619087 | 0.1562062 | 0.6565261 | 1.00E-05 |
| liberal | PD_HY3 | psychencode | ENSG00000078369 | GNB1      | 1429 | 0.007284911 | 0.837699784 | 0.0008084 | 0.0928987 | 0.0613082 | 0.1542069 | 0.6599466 | 1.00E-05 |
| liberal | PD_HY3 | psychencode | ENSG00000169885 | CALML6    | 1490 | 0.007431244 | 0.850558862 | 0.0007006 | 0.0801315 | 0.0611778 | 0.1413093 | 0.7634671 | 1.00E-05 |
| liberal | PD_HY3 | psychencode | ENSG00000160072 | ATAD3B    | 1020 | 0.007249935 | 0.849366304 | 0.0007016 | 0.0821357 | 0.0605465 | 0.1426822 | 0.7371525 | 1.00E-05 |
| liberal | PD_HY3 | psychencode | ENSG00000228594 | C1orf233  | 1183 | 0.007410877 | 0.863478265 | 0.0005855 | 0.0681560 | 0.0603694 | 0.1285254 | 0.8857536 | 1.00E-05 |
| liberal | PD_HY3 | psychencode | ENSG00000238164 |           | 2127 | 0.007055801 | 0.797980419 | 0.0011813 | 0.1335377 | 0.0602448 | 0.1937825 | 0.4511449 | 1.00E-05 |
| liberal | PD_HY3 | psychencode | ENSG00000264293 | RN7SL657P | 894  | 0.007419092 | 0.874451299 | 0.0004877 | 0.0574256 | 0.0602163 | 0.1176419 | 1.0485962 | 1.00E-05 |
| liberal | PD_HY3 | psychencode | ENSG00000187730 | GABRD     | 1669 | 0.007208942 | 0.822942381 | 0.0009547 | 0.1089243 | 0.0599697 | 0.1688940 | 0.5505631 | 1.00E-05 |
| liberal | PD_HY3 | psychencode | ENSG00000249356 |           | 3469 | 0.000749827 | 0.000134994 | 0.7964416 | 0.1433271 | 0.0593465 | 0.2026736 | 0.4140634 | 1.00E-05 |
| robust  | PD_HY3 | psychencode | ENSG00000234396 |           | 1931 | 0.007362309 | 0.834108227 | 0.0008714 | 0.0986099 | 0.0590481 | 0.1576580 | 0.5988054 | 5.00E-06 |
| liberal | PD_HY3 | psychencode | ENSG00000269554 |           | 1926 | 0.007257403 | 0.822588794 | 0.0009735 | 0.1102806 | 0.0588997 | 0.1691803 | 0.5340897 | 1.00E-05 |
| robust  | PD_HY3 | psychencode | ENSG00000269737 |           | 1241 | 0.007468644 | 0.866330591 | 0.0005771 | 0.0668277 | 0.0587959 | 0.1256236 | 0.8798137 | 5.00E-06 |



|         |        |             |                 |          |      |             |             |           |           |           |           |           |          |
|---------|--------|-------------|-----------------|----------|------|-------------|-------------|-----------|-----------|-----------|-----------|-----------|----------|
| liberal | PD_HY3 | psychencode | ENSG00000178642 |          | 2006 | 0.007097254 | 0.801494451 | 0.0011647 | 0.1314661 | 0.0587776 | 0.1902436 | 0.4470933 | 1.00E-05 |
| liberal | PD_HY3 | psychencode | ENSG00000203301 |          | 1931 | 0.007211755 | 0.816975099 | 0.0010270 | 0.1162807 | 0.0585055 | 0.1747862 | 0.5031400 | 1.00E-05 |
| liberal | PD_HY3 | psychencode | ENSG00000138735 | PDE5A    | 3595 | 0.215171845 | 0.046340023 | 0.5595780 | 0.1204539 | 0.0584563 | 0.1789102 | 0.4853004 | 1.00E-05 |
| liberal | PD_HY3 | psychencode | ENSG00000157873 | TNFRSF14 | 2130 | 0.007098983 | 0.803156374 | 0.0011550 | 0.1306177 | 0.0579719 | 0.1885896 | 0.4438292 | 1.00E-05 |
| liberal | PD_HY3 | psychencode | ENSG00000272161 |          | 1947 | 0.007395656 | 0.837385505 | 0.0008536 | 0.0965923 | 0.0577729 | 0.1543652 | 0.5981114 | 1.00E-05 |
| robust  | PD_HY3 | psychencode | ENSG00000243558 |          | 1931 | 0.007389993 | 0.837244633 | 0.0008576 | 0.0970420 | 0.0574658 | 0.1545078 | 0.5921750 | 5.00E-06 |
| liberal | PD_HY3 | psychencode | ENSG00000197921 | HES5     | 2123 | 0.007158065 | 0.808960551 | 0.0011105 | 0.1254457 | 0.0573251 | 0.1827709 | 0.4569716 | 1.00E-05 |
| liberal | PD_HY3 | psychencode | ENSG00000271806 |          | 1839 | 0.007203308 | 0.816404517 | 0.0010469 | 0.1185957 | 0.0567496 | 0.1753453 | 0.4785127 | 1.00E-05 |
| liberal | PD_HY3 | psychencode | ENSG00000272449 |          | 2129 | 0.006864207 | 0.776007292 | 0.0014083 | 0.1591541 | 0.0565661 | 0.2157202 | 0.3554170 | 1.00E-05 |
| liberal | PD_HY3 | psychencode | ENSG00000238240 |          | 1958 | 0.006814118 | 0.771170516 | 0.0014522 | 0.1642876 | 0.0562756 | 0.2205632 | 0.3425434 | 1.00E-05 |
| robust  | PD_HY3 | psychencode | ENSG00000223663 |          | 867  | 0.014198777 | 0.875620277 | 0.0008658 | 0.0532826 | 0.0560325 | 0.1093151 | 1.0516095 | 5.00E-06 |
| liberal | PD_HY3 | psychencode | ENSG00000256761 |          | 2631 | 0.007127531 | 0.806430984 | 0.0011500 | 0.1300546 | 0.0552369 | 0.1852915 | 0.4247207 | 1.00E-05 |
| liberal | PD_HY3 | psychencode | ENSG00000197785 | ATAD3A   | 1068 | 0.006536566 | 0.767463572 | 0.0014427 | 0.1693376 | 0.0552195 | 0.2245571 | 0.3260912 | 1.00E-05 |
| liberal | PD_HY3 | psychencode | ENSG00000231050 |          | 1430 | 0.006251873 | 0.718909227 | 0.0018983 | 0.2182310 | 0.0547096 | 0.2729406 | 0.2506958 | 1.00E-05 |
| liberal | PD_HY3 | psychencode | ENSG00000189339 | SLC35E2B | 1241 | 0.006574797 | 0.762648249 | 0.0015113 | 0.1752544 | 0.0540112 | 0.2292656 | 0.3081873 | 1.00E-05 |
| robust  | PD_HY3 | psychencode | ENSG00000269227 |          | 1241 | 0.007379104 | 0.855944371 | 0.0007107 | 0.0823313 | 0.0536345 | 0.1359658 | 0.6514474 | 5.00E-06 |
| robust  | PD_HY3 | psychencode | ENSG00000157933 | SKI      | 1916 | 0.007029473 | 0.795653579 | 0.0012611 | 0.1426318 | 0.0534241 | 0.1960559 | 0.3745592 | 5.00E-06 |
| liberal | PD_HY3 | psychencode | ENSG00000205116 | TMEM88B  | 929  | 0.005504604 | 0.64716034  | 0.0024853 | 0.2921390 | 0.0527107 | 0.3448497 | 0.1804303 | 1.00E-05 |
| liberal | PD_HY3 | psychencode | ENSG00000250412 | KLHL2P1  | 3349 | 0.001544109 | 0.0002874   | 0.7988303 | 0.1486331 | 0.0507052 | 0.1993382 | 0.3411433 | 1.00E-05 |
| liberal | PD_HY3 | eQTLGen     | ENSG00000150961 | SEC24D   | 4816 | 5.29E-10    | 7.45E-10    | 0.3946146 | 0.5560091 | 0.0493763 | 0.6053854 | 0.0888048 | 1.00E-05 |
| liberal | PD_HY3 | psychencode | ENSG00000272782 |          | 3373 | 2.66E-40    | 2.02E-40    | 0.5430740 | 0.4114928 | 0.0454332 | 0.4569260 | 0.1104108 | 1.00E-05 |
| liberal | PD_HY3 | psychencode | ENSG00000142606 | MMEL1    | 2156 | 0.005825982 | 0.660394872 | 0.0025231 | 0.2859514 | 0.0453047 | 0.3312561 | 0.1584349 | 1.00E-05 |
| robust  | PD_HY3 | psychencode | ENSG00000242485 | MRPL20   | 894  | 0.007662057 | 0.903088355 | 0.0003880 | 0.0456454 | 0.0432161 | 0.0888616 | 0.9467791 | 5.00E-06 |
| liberal | PD_HY3 | eQTLGen     | ENSG00000205356 | TECPR1   | 4709 | 3.38E-305   | 2.92E-305   | 0.5137764 | 0.4438993 | 0.0423243 | 0.4862236 | 0.0953466 | 1.00E-05 |
| robust  | PD_HY3 | eQTLGen     | ENSG00000138735 | PDE5A    | 5052 | 3.12E-48    | 5.31E-48    | 0.3550084 | 0.6045014 | 0.0404901 | 0.6449916 | 0.0669810 | 5.00E-06 |
| liberal | PD_HY3 | psychencode | ENSG00000213455 |          | 3088 | 0.322928933 | 0.237548884 | 0.2308169 | 0.1697516 | 0.0389537 | 0.2087053 | 0.2294746 | 1.00E-05 |
| liberal | PD_HY3 | psychencode | ENSG00000237058 |          | 2207 | 0.004714864 | 0.534720072 | 0.0036871 | 0.4181168 | 0.0387612 | 0.4568780 | 0.0927043 | 1.00E-05 |
| robust  | PD_HY3 | psychencode | ENSG00000215014 |          | 1141 | 0.007167658 | 0.838046196 | 0.0009911 | 0.1157992 | 0.0379959 | 0.1537951 | 0.3281183 | 5.00E-06 |
| liberal | PD_HY3 | eQTLGen     | ENSG00000115421 | PAPOLG   | 4389 | 0.056195862 | 0.675793875 | 0.0176692 | 0.2124467 | 0.0378943 | 0.2503410 | 0.1783710 | 1.00E-05 |
| robust  | PD_HY3 | psychencode | ENSG00000228037 |          | 2142 | 0.007261828 | 0.822678538 | 0.0011613 | 0.1314886 | 0.0374098 | 0.1688983 | 0.2845096 | 5.00E-06 |
| robust  | PD_HY3 | psychencode | ENSG00000157916 | RER1     | 2025 | 0.007419386 | 0.836909033 | 0.0010417 | 0.1174278 | 0.0372021 | 0.1546299 | 0.3168078 | 5.00E-06 |
| liberal | PD_HY3 | psychencode | ENSG00000157881 | PANK4    | 2123 | 0.004419965 | 0.499517265 | 0.0040256 | 0.4549072 | 0.0371300 | 0.4920372 | 0.0816210 | 1.00E-05 |
| robust  | PD_HY3 | psychencode | ENSG00000272004 |          | 1241 | 0.007581459 | 0.879416685 | 0.0006517 | 0.0755190 | 0.0368311 | 0.1123502 | 0.4877065 | 5.00E-06 |
| robust  | PD_HY3 | psychencode | ENSG00000142609 | C1orf222 | 1503 | 0.007542917 | 0.863003454 | 0.0008065 | 0.0922052 | 0.0364418 | 0.1286471 | 0.3952252 | 5.00E-06 |

|         |        |             |                 |           |      |             |             |           |           |           |           |           |          |
|---------|--------|-------------|-----------------|-----------|------|-------------|-------------|-----------|-----------|-----------|-----------|-----------|----------|
| robust  | PD_HY3 | psychencode | ENSG00000225931 |           | 2128 | 0.007440269 | 0.842128135 | 0.0010024 | 0.1133825 | 0.0360467 | 0.1494292 | 0.3179208 | 5.00E-06 |
| robust  | PD_HY3 | psychencode | ENSG00000215791 |           | 1132 | 0.007174422 | 0.839406274 | 0.0009956 | 0.1164124 | 0.0360113 | 0.1524237 | 0.3093425 | 5.00E-06 |
| liberal | PD_HY3 | psychencode | ENSG00000229393 |           | 2081 | 0.004195267 | 0.473772918 | 0.0042685 | 0.4820098 | 0.0357535 | 0.5177633 | 0.0741759 | 1.00E-05 |
| robust  | PD_HY3 | psychencode | ENSG00000008130 | NADK      | 1267 | 0.007516164 | 0.874012785 | 0.0007065 | 0.0820831 | 0.0356814 | 0.1177646 | 0.4346990 | 5.00E-06 |
| liberal | PD_HY3 | psychencode | ENSG00000173163 | COMMD1    | 2567 | 0.502220831 | 0.324641065 | 0.0835939 | 0.0540005 | 0.0355437 | 0.0895442 | 0.6582113 | 1.00E-05 |
| robust  | PD_HY3 | psychencode | ENSG00000189409 | MMP23B    | 1228 | 0.007425071 | 0.861481212 | 0.0008175 | 0.0947766 | 0.0354996 | 0.1302762 | 0.3745604 | 5.00E-06 |
| liberal | PD_HY3 | psychencode | ENSG00000221048 |           | 3313 | 0.170095421 | 0.129272601 | 0.3779660 | 0.2872189 | 0.0354470 | 0.3226660 | 0.1234147 | 1.00E-05 |
| robust  | PD_HY3 | psychencode | ENSG00000205090 | TMEM240   | 1113 | 0.007665712 | 0.898445894 | 0.0004962 | 0.0580913 | 0.0353008 | 0.0933921 | 0.6076784 | 5.00E-06 |
| liberal | PD_HY3 | psychencode | ENSG00000164715 | LMTK2     | 3317 | 0.451905772 | 0.342449101 | 0.0970001 | 0.0734704 | 0.0351746 | 0.1086450 | 0.4787580 | 1.00E-05 |
| liberal | PD_HY3 | psychencode | ENSG00000227284 | MARK2P10  | 2726 | 0.499684596 | 0.324949923 | 0.0849974 | 0.0552396 | 0.0351285 | 0.0903681 | 0.6359304 | 1.00E-05 |
| robust  | PD_HY3 | psychencode | ENSG00000197530 | MIB2      | 1207 | 0.007309272 | 0.84977695  | 0.0009213 | 0.1070406 | 0.0349519 | 0.1419925 | 0.3265296 | 5.00E-06 |
| robust  | PD_HY3 | psychencode | ENSG00000221978 | CCNL2     | 877  | 0.007549171 | 0.841307235 | 0.0010342 | 0.1151844 | 0.0349250 | 0.1501094 | 0.3032090 | 5.00E-06 |
| robust  | PD_HY3 | psychencode | ENSG00000272455 |           | 894  | 0.007456382 | 0.878846448 | 0.0006641 | 0.0782011 | 0.0348320 | 0.1130331 | 0.4454157 | 5.00E-06 |
| robust  | PD_HY3 | psychencode | ENSG00000180535 | BHLHA15   | 3403 | 7.80E-41    | 5.95E-41    | 0.5477429 | 0.4179507 | 0.0343064 | 0.4522571 | 0.0820824 | 5.00E-06 |
| robust  | PD_HY3 | psychencode | ENSG00000182873 |           | 1925 | 0.007171799 | 0.812867159 | 0.0012754 | 0.1444890 | 0.0341967 | 0.1786856 | 0.2366731 | 5.00E-06 |
| robust  | PD_HY3 | psychencode | ENSG00000179403 | VWA1      | 940  | 0.007698048 | 0.904883405 | 0.0004507 | 0.0529150 | 0.0340528 | 0.0869678 | 0.6435369 | 5.00E-06 |
| liberal | PD_HY3 | psychencode | ENSG00000271146 |           | 2575 | 0.391008241 | 0.268717521 | 0.1820402 | 0.1250726 | 0.0331614 | 0.1582340 | 0.2651371 | 1.00E-05 |
| robust  | PD_HY3 | psychencode | ENSG00000067606 | PRKCZ     | 1719 | 0.007673772 | 0.873203924 | 0.0007516 | 0.0854602 | 0.0329105 | 0.1183707 | 0.3850970 | 5.00E-06 |
| liberal | PD_HY3 | psychencode | ENSG00000006453 | BAIAP2L1  | 3133 | 0.386703882 | 0.285112227 | 0.1701346 | 0.1254056 | 0.0326437 | 0.1580493 | 0.2603048 | 1.00E-05 |
| robust  | PD_HY3 | psychencode | ENSG00000233542 |           | 1660 | 0.006841991 | 0.781446752 | 0.0015557 | 0.1776202 | 0.0325354 | 0.2101555 | 0.1831738 | 5.00E-06 |
| robust  | PD_HY3 | psychencode | ENSG00000269753 |           | 1950 | 0.007171089 | 0.811974812 | 0.0013009 | 0.1472369 | 0.0323163 | 0.1795532 | 0.2194850 | 5.00E-06 |
| liberal | PD_HY3 | psychencode | ENSG00000231859 |           | 3310 | 0.426140758 | 0.323871325 | 0.1238222 | 0.0940740 | 0.0320917 | 0.1261657 | 0.3411323 | 1.00E-05 |
| robust  | PD_HY3 | psychencode | ENSG00000225285 |           | 940  | 0.007288699 | 0.856765596 | 0.0008772 | 0.1030535 | 0.0320150 | 0.1350685 | 0.3106635 | 5.00E-06 |
| robust  | PD_HY3 | psychencode | ENSG00000272106 |           | 1208 | 0.007419353 | 0.862490286 | 0.0008376 | 0.0973096 | 0.0319431 | 0.1292527 | 0.3282630 | 5.00E-06 |
| liberal | PD_HY3 | psychencode | ENSG00000215914 | MMP23A    | 1242 | 0.003660872 | 0.424769337 | 0.0046124 | 0.5351452 | 0.0318122 | 0.5669574 | 0.0594459 | 1.00E-05 |
| robust  | PD_HY3 | psychencode | ENSG00000078369 | GNB1      | 1429 | 0.007515285 | 0.864190768 | 0.0008340 | 0.0958365 | 0.0316235 | 0.1274600 | 0.3299733 | 5.00E-06 |
| liberal | PD_HY3 | psychencode | ENSG00000145390 | USP53     | 3410 | 1.06E-23    | 1.89E-24    | 0.8217532 | 0.1466521 | 0.0315947 | 0.1782468 | 0.2154398 | 1.00E-05 |
| robust  | PD_HY3 | psychencode | ENSG00000169885 | CALML6    | 1490 | 0.00766573  | 0.877397469 | 0.0007227 | 0.0826600 | 0.0315541 | 0.1142141 | 0.3817335 | 5.00E-06 |
| liberal | PD_HY3 | psychencode | ENSG00000232713 |           | 2698 | 0.317983401 | 0.223542448 | 0.2508103 | 0.1762884 | 0.0313754 | 0.2076638 | 0.1779780 | 1.00E-05 |
| robust  | PD_HY3 | psychencode | ENSG00000160072 | ATAD3B    | 1020 | 0.007476265 | 0.875882102 | 0.0007235 | 0.0846998 | 0.0312183 | 0.1159181 | 0.3685762 | 5.00E-06 |
| robust  | PD_HY3 | psychencode | ENSG00000228594 | C1orf233  | 1183 | 0.007641535 | 0.890353314 | 0.0006037 | 0.0702773 | 0.0311242 | 0.1014015 | 0.4428768 | 5.00E-06 |
| liberal | PD_HY3 | psychencode | ENSG00000224475 |           | 3050 | 0.468610946 | 0.343068496 | 0.0908066 | 0.0664481 | 0.0310658 | 0.0975139 | 0.4675195 | 1.00E-05 |
| robust  | PD_HY3 | psychencode | ENSG00000238164 |           | 2127 | 0.00727494  | 0.822764062 | 0.0012180 | 0.1376851 | 0.0310580 | 0.1687430 | 0.2255725 | 5.00E-06 |
| robust  | PD_HY3 | psychencode | ENSG00000264293 | RN7SL657P | 894  | 0.007649402 | 0.901596696 | 0.0005029 | 0.0592083 | 0.0310428 | 0.0902510 | 0.5242981 | 5.00E-06 |

|         |        |             |                 |           |      |             |             |           |           |           |           |           |          |
|---------|--------|-------------|-----------------|-----------|------|-------------|-------------|-----------|-----------|-----------|-----------|-----------|----------|
| robust  | PD_HY3 | psychencode | ENSG00000187730 | GABRD     | 1669 | 0.007431783 | 0.848380953 | 0.0009842 | 0.1122913 | 0.0309117 | 0.1432031 | 0.2752815 | 5.00E-06 |
| liberal | PD_HY3 | psychencode | ENSG00000227361 | RPS24P7   | 2621 | 0.445815589 | 0.294146851 | 0.1380924 | 0.0910818 | 0.0308633 | 0.1219451 | 0.3388527 | 1.00E-05 |
| liberal | PD_HY3 | psychencode | ENSG00000166448 | TMEM130   | 2492 | 0.447731431 | 0.324647731 | 0.1141532 | 0.0827412 | 0.0307265 | 0.1134676 | 0.3713564 | 1.00E-05 |
| liberal | PD_HY3 | psychencode | ENSG00000231764 | DLX6-AS1  | 2867 | 0.466411613 | 0.316508081 | 0.1111052 | 0.0753657 | 0.0306094 | 0.1059751 | 0.4061450 | 1.00E-05 |
| robust  | PD_HY3 | psychencode | ENSG00000249356 |           | 3469 | 0.000772758 | 0.000139123 | 0.8207973 | 0.1477101 | 0.0305807 | 0.1782908 | 0.2070317 | 5.00E-06 |
| liberal | PD_HY3 | psychencode | ENSG00000196636 | ACN9      | 2953 | 0.468810266 | 0.334933066 | 0.0967034 | 0.0690575 | 0.0304957 | 0.0995532 | 0.4415987 | 1.00E-05 |
| robust  | PD_HY3 | psychencode | ENSG00000269554 |           | 1926 | 0.007477618 | 0.847548996 | 0.0010030 | 0.1136269 | 0.0303435 | 0.1439704 | 0.2670449 | 5.00E-06 |
| liberal | PD_HY3 | psychencode | ENSG00000164096 | C4orf3    | 3353 | 0.406512588 | 0.075060194 | 0.4120391 | 0.0760503 | 0.0303378 | 0.1063881 | 0.3989176 | 1.00E-05 |
| robust  | PD_HY3 | psychencode | ENSG00000178642 |           | 2006 | 0.007312149 | 0.825762618 | 0.0011999 | 0.1354467 | 0.0302786 | 0.1657253 | 0.2235466 | 5.00E-06 |
| robust  | PD_HY3 | psychencode | ENSG00000203301 |           | 1931 | 0.007429076 | 0.841594026 | 0.0010579 | 0.1197847 | 0.0301342 | 0.1499190 | 0.2515700 | 5.00E-06 |
| robust  | PD_HY3 | psychencode | ENSG00000138735 | PDE5A     | 3595 | 0.221650273 | 0.047735236 | 0.5764258 | 0.1240805 | 0.0301082 | 0.1541887 | 0.2426502 | 5.00E-06 |
| liberal | PD_HY3 | psychencode | ENSG00000226046 |           | 3181 | 0.462791986 | 0.345690993 | 0.0924223 | 0.0690064 | 0.0300883 | 0.0990947 | 0.4360212 | 1.00E-05 |
| liberal | PD_HY3 | psychencode | ENSG00000106236 | NPTX2     | 2931 | 0.451611832 | 0.331074811 | 0.1080492 | 0.0791804 | 0.0300837 | 0.1092641 | 0.3799394 | 1.00E-05 |
| liberal | PD_HY3 | psychencode | ENSG00000271707 | ATP1B3P1  | 2615 | 0.505119088 | 0.343972395 | 0.0720152 | 0.0490105 | 0.0298827 | 0.0788933 | 0.6097207 | 1.00E-05 |
| liberal | PD_HY3 | psychencode | ENSG00000214389 | RPS3AP26  | 3182 | 0.47313682  | 0.34966441  | 0.0847297 | 0.0625883 | 0.0298807 | 0.0924690 | 0.4774169 | 1.00E-05 |
| robust  | PD_HY3 | psychencode | ENSG00000157873 | TNFRSF14  | 2130 | 0.007310896 | 0.827131586 | 0.0011895 | 0.1345168 | 0.0298512 | 0.1643680 | 0.2219146 | 5.00E-06 |
| liberal | PD_HY3 | psychencode | ENSG00000226744 |           | 3381 | 0.442388589 | 0.335438984 | 0.1094336 | 0.0829477 | 0.0297911 | 0.1127388 | 0.3591559 | 1.00E-05 |
| liberal | PD_HY3 | psychencode | ENSG00000244318 | RN7SL252P | 2742 | 0.491993016 | 0.318209584 | 0.0972037 | 0.0628393 | 0.0297543 | 0.0925937 | 0.4734986 | 1.00E-05 |
| robust  | PD_HY3 | psychencode | ENSG00000272161 |           | 1947 | 0.007615645 | 0.862294142 | 0.0008790 | 0.0994655 | 0.0297457 | 0.1292112 | 0.2990557 | 5.00E-06 |
| robust  | PD_HY3 | psychencode | ENSG00000197921 | HES5      | 2123 | 0.007369287 | 0.832831647 | 0.0011433 | 0.1291474 | 0.0295084 | 0.1586558 | 0.2284858 | 5.00E-06 |
| liberal | PD_HY3 | psychencode | ENSG00000271956 | DLX6-AS2  | 2854 | 0.455376679 | 0.299603647 | 0.1300183 | 0.0855128 | 0.0294885 | 0.1150013 | 0.3448434 | 1.00E-05 |
| liberal | PD_HY3 | psychencode | ENSG00000199475 | RN7SKP104 | 3111 | 0.453595462 | 0.335851977 | 0.1040918 | 0.0770424 | 0.0294184 | 0.1064608 | 0.3818470 | 1.00E-05 |
| robust  | PD_HY3 | psychencode | ENSG00000271806 |           | 1839 | 0.007413669 | 0.840246321 | 0.0010775 | 0.1220591 | 0.0292034 | 0.1512625 | 0.2392563 | 5.00E-06 |
| liberal | PD_HY3 | psychencode | ENSG00000232032 |           | 3310 | 0.445892757 | 0.339135584 | 0.1055671 | 0.0802627 | 0.0291418 | 0.1094046 | 0.3630805 | 1.00E-05 |
| robust  | PD_HY3 | psychencode | ENSG00000272449 |           | 2129 | 0.007063999 | 0.798593955 | 0.0014493 | 0.1637865 | 0.0291063 | 0.1928927 | 0.1777085 | 5.00E-06 |
| liberal | PD_HY3 | psychencode | ENSG00000231812 |           | 3359 | 0.431258199 | 0.327099043 | 0.1209200 | 0.0916859 | 0.0290369 | 0.1207228 | 0.3166996 | 1.00E-05 |
| liberal | PD_HY3 | psychencode | ENSG00000006377 | DLX6      | 2848 | 0.504250628 | 0.326130482 | 0.0853991 | 0.0552039 | 0.0290158 | 0.0842198 | 0.5256117 | 1.00E-05 |
| robust  | PD_HY3 | psychencode | ENSG00000238240 |           | 1958 | 0.007011404 | 0.793497809 | 0.0014942 | 0.1690441 | 0.0289525 | 0.1979966 | 0.1712717 | 5.00E-06 |
| liberal | PD_HY3 | psychencode | ENSG00000237818 | RPS3AP29  | 3327 | 0.380434413 | 0.289044384 | 0.1713867 | 0.1301863 | 0.0289482 | 0.1591345 | 0.2223599 | 1.00E-05 |
| liberal | PD_HY3 | psychencode | ENSG00000228414 |           | 2707 | 0.459622557 | 0.321471107 | 0.1117994 | 0.0781663 | 0.0289407 | 0.1071069 | 0.3702452 | 1.00E-05 |
| liberal | PD_HY3 | psychencode | ENSG00000224551 | HMGB3P21  | 2980 | 0.459819506 | 0.330775373 | 0.1049826 | 0.0754913 | 0.0289312 | 0.1044225 | 0.3832394 | 1.00E-05 |
| liberal | PD_HY3 | psychencode | ENSG00000263819 | RN7SL478P | 3326 | 0.469189783 | 0.356116777 | 0.0828863 | 0.0628821 | 0.0289251 | 0.0918071 | 0.4599891 | 1.00E-05 |
| liberal | PD_HY3 | psychencode | ENSG00000232097 |           | 3287 | 0.449100131 | 0.33993667  | 0.1038317 | 0.0785646 | 0.0285668 | 0.1071315 | 0.3636093 | 1.00E-05 |
| liberal | PD_HY3 | psychencode | ENSG00000205356 | TECPR1    | 3395 | 0.432935847 | 0.329008607 | 0.1190907 | 0.0904742 | 0.0284907 | 0.1189649 | 0.3149042 | 1.00E-05 |

|         |        |             |                 |           |      |             |             |           |           |           |           |           |          |
|---------|--------|-------------|-----------------|-----------|------|-------------|-------------|-----------|-----------|-----------|-----------|-----------|----------|
| robust  | PD_HY3 | psychencode | ENSG00000256761 |           | 2631 | 0.007329973 | 0.829335955 | 0.0011826 | 0.1337486 | 0.0284029 | 0.1621515 | 0.2123603 | 5.00E-06 |
| robust  | PD_HY3 | psychencode | ENSG00000197785 | ATAD3A    | 1068 | 0.006722163 | 0.789254702 | 0.0014837 | 0.1741457 | 0.0283937 | 0.2025394 | 0.1630456 | 5.00E-06 |
| liberal | PD_HY3 | psychencode | ENSG00000105880 | DLX5      | 2877 | 0.475627696 | 0.330926145 | 0.0973972 | 0.0677375 | 0.0283115 | 0.0960490 | 0.4179595 | 1.00E-05 |
| robust  | PD_HY3 | psychencode | ENSG00000231050 |           | 1430 | 0.006427702 | 0.739127923 | 0.0019517 | 0.2243686 | 0.0281241 | 0.2524927 | 0.1253479 | 5.00E-06 |
| liberal | PD_HY3 | psychencode | ENSG00000164713 | BRI3      | 3396 | 0.25138901  | 0.191057488 | 0.3009808 | 0.2287198 | 0.0278529 | 0.2565727 | 0.1217775 | 1.00E-05 |
| liberal | PD_HY3 | psychencode | ENSG00000135175 | OCM2      | 3318 | 0.400656616 | 0.304007374 | 0.1521129 | 0.1153913 | 0.0278318 | 0.1432231 | 0.2411954 | 1.00E-05 |
| robust  | PD_HY3 | psychencode | ENSG00000189339 | SLC35E2B  | 1241 | 0.006757282 | 0.783815657 | 0.0015533 | 0.1801186 | 0.0277551 | 0.2078738 | 0.1540936 | 5.00E-06 |
| liberal | PD_HY3 | psychencode | ENSG00000237024 |           | 2687 | 0.481163342 | 0.336461505 | 0.0910336 | 0.0636290 | 0.0277126 | 0.0913416 | 0.4355335 | 1.00E-05 |
| liberal | PD_HY3 | psychencode | ENSG00000221245 |           | 3465 | 0.612765788 | 0.129464789 | 0.1902412 | 0.0401667 | 0.0273615 | 0.0675282 | 0.6811999 | 1.00E-05 |
| robust  | PD_HY3 | psychencode | ENSG00000205116 | TMEM88B   | 929  | 0.005653607 | 0.664678179 | 0.0025526 | 0.3000468 | 0.0270688 | 0.3271156 | 0.0902152 | 5.00E-06 |
| liberal | PD_HY3 | psychencode | ENSG00000230702 |           | 2576 | 0.504729439 | 0.327054073 | 0.0858223 | 0.0555842 | 0.0268099 | 0.0823942 | 0.4823300 | 1.00E-05 |
| liberal | PD_HY3 | psychencode | ENSG00000225905 |           | 913  | 0.003224886 | 0.379720286 | 0.0049719 | 0.5854049 | 0.0266779 | 0.6120829 | 0.0455718 | 1.00E-05 |
| liberal | PD_HY3 | psychencode | ENSG00000272950 |           | 3304 | 1.14E-24    | 8.59E-25    | 0.5554668 | 0.4180042 | 0.0265290 | 0.4445332 | 0.0634660 | 1.00E-05 |
| liberal | PD_HY3 | psychencode | ENSG00000235982 |           | 3363 | 0.38405452  | 0.291313996 | 0.1696238 | 0.1286371 | 0.0263705 | 0.1550076 | 0.2049991 | 1.00E-05 |
| robust  | PD_HY3 | psychencode | ENSG00000250412 | KLHL2P1   | 3349 | 0.001584275 | 0.000294876 | 0.8196095 | 0.1524993 | 0.0260121 | 0.1785114 | 0.1705716 | 5.00E-06 |
| liberal | PD_HY3 | eQTLGen     | ENSG00000196636 | ACN9      | 4165 | 3.00E-35    | 2.39E-35    | 0.5416952 | 0.4322982 | 0.0260066 | 0.4583048 | 0.0601589 | 1.00E-05 |
| liberal | PD_HY3 | psychencode | ENSG00000242158 | RN7SL361P | 2616 | 0.421205836 | 0.285208012 | 0.1595637 | 0.1080182 | 0.0260043 | 0.1340225 | 0.2407399 | 1.00E-05 |
| liberal | PD_HY3 | psychencode | ENSG00000236498 |           | 2574 | 0.509788315 | 0.329332486 | 0.0821355 | 0.0530353 | 0.0257085 | 0.0787437 | 0.4847424 | 1.00E-05 |
| liberal | PD_HY3 | eQTLGen     | ENSG00000180535 | BHLHA15   | 4709 | 0.330875262 | 0.286210466 | 0.1916449 | 0.1657493 | 0.0255201 | 0.1912694 | 0.1539684 | 1.00E-05 |
| liberal | PD_HY3 | psychencode | ENSG00000212978 |           | 2583 | 1.50E-20    | 1.03E-20    | 0.5772510 | 0.3973490 | 0.0254001 | 0.4227490 | 0.0639239 | 1.00E-05 |
| robust  | PD_HY3 | eQTLGen     | ENSG00000150961 | SEC24D    | 4816 | 5.42E-10    | 7.64E-10    | 0.4046035 | 0.5700834 | 0.0253131 | 0.5953965 | 0.0444024 | 5.00E-06 |
| liberal | PD_HY3 | psychencode | ENSG00000115421 | PAPOLG    | 2665 | 0.467831857 | 0.325330256 | 0.1071305 | 0.0744733 | 0.0252340 | 0.0997073 | 0.3388327 | 1.00E-05 |
| liberal | PD_HY3 | psychencode | ENSG00000162924 | REL       | 2707 | 0.493155075 | 0.344924559 | 0.0804633 | 0.0562528 | 0.0252043 | 0.0814571 | 0.4480545 | 1.00E-05 |
| liberal | PD_HY3 | eQTLGen     | ENSG00000214389 | RPS3AP26  | 4439 | 0.419233609 | 0.348765992 | 0.1129246 | 0.0939183 | 0.0251575 | 0.1190758 | 0.2678658 | 1.00E-05 |
| liberal | PD_HY3 | psychencode | ENSG00000234624 |           | 2617 | 0.503669002 | 0.347204732 | 0.0733988 | 0.0505724 | 0.0251550 | 0.0757274 | 0.4974056 | 1.00E-05 |
| liberal | PD_HY3 | psychencode | ENSG00000229839 |           | 2442 | 0.510167805 | 0.259474595 | 0.1360948 | 0.0691936 | 0.0250691 | 0.0942628 | 0.3623038 | 1.00E-05 |
| liberal | PD_HY3 | psychencode | ENSG00000271134 |           | 2615 | 0.449036716 | 0.303404494 | 0.1331010 | 0.0899089 | 0.0245489 | 0.1144578 | 0.2730414 | 1.00E-05 |
| liberal | PD_HY3 | psychencode | ENSG00000178636 |           | 3410 | 0.409472202 | 0.073091163 | 0.4183283 | 0.0746475 | 0.0244608 | 0.0991083 | 0.3276844 | 1.00E-05 |
| liberal | PD_HY3 | psychencode | ENSG00000229831 |           | 2611 | 0.50510388  | 0.330949892 | 0.0844773 | 0.0553263 | 0.0241426 | 0.0794690 | 0.4363674 | 1.00E-05 |
| liberal | PD_HY3 | eQTLGen     | ENSG00000142611 | PRDM16    | 4240 | 0.00761516  | 0.871317011 | 0.0008409 | 0.0961869 | 0.0240400 | 0.1202270 | 0.2499303 | 1.00E-05 |
| liberal | PD_HY3 | eQTLGen     | ENSG00000115464 | USP34     | 3993 | 7.04E-64    | 8.39E-63    | 0.0755837 | 0.9005429 | 0.0238734 | 0.9244163 | 0.0265100 | 1.00E-05 |
| liberal | PD_HY3 | psychencode | ENSG00000115484 | CCT4      | 2568 | 0.47859472  | 0.30943905  | 0.1143032 | 0.0738798 | 0.0237831 | 0.0976630 | 0.3219166 | 1.00E-05 |
| liberal | PD_HY3 | psychencode | ENSG00000270820 |           | 2664 | 0.419801643 | 0.290840663 | 0.1570443 | 0.1087775 | 0.0235359 | 0.1323134 | 0.2163671 | 1.00E-05 |
| liberal | PD_HY3 | eQTLGen     | ENSG00000164715 | LMTK2     | 4603 | 2.03E-182   | 1.74E-182   | 0.5259115 | 0.4506665 | 0.0234220 | 0.4740885 | 0.0519719 | 1.00E-05 |

|         |        |             |                 |           |      |             |             |           |           |           |           |           |          |
|---------|--------|-------------|-----------------|-----------|------|-------------|-------------|-----------|-----------|-----------|-----------|-----------|----------|
| liberal | PD_HY3 | psychencode | ENSG00000271243 |           | 2769 | 0.498530355 | 0.347573822 | 0.0769060 | 0.0535952 | 0.0233946 | 0.0769898 | 0.4365049 | 1.00E-05 |
| liberal | PD_HY3 | psychencode | ENSG00000213495 |           | 2595 | 0.469851865 | 0.317580277 | 0.1129341 | 0.0763106 | 0.0233232 | 0.0996338 | 0.3056346 | 1.00E-05 |
| robust  | PD_HY3 | psychencode | ENSG00000272782 |           | 3373 | 2.72E-40    | 2.06E-40    | 0.5556975 | 0.4210578 | 0.0232447 | 0.4443025 | 0.0552054 | 5.00E-06 |
| liberal | PD_HY3 | psychencode | ENSG00000172399 | MYOZ2     | 3455 | 1.64E-07    | 2.95E-08    | 0.8281653 | 0.1486291 | 0.0232055 | 0.1718345 | 0.1561301 | 1.00E-05 |
| robust  | PD_HY3 | psychencode | ENSG00000142606 | MMEL1     | 2156 | 0.005961012 | 0.675701086 | 0.0025815 | 0.2925790 | 0.0231774 | 0.3157564 | 0.0792175 | 5.00E-06 |
| liberal | PD_HY3 | psychencode | ENSG00000115464 | USP34     | 2581 | 0.49483279  | 0.34012372  | 0.0841648 | 0.0578277 | 0.0230511 | 0.0808787 | 0.3986166 | 1.00E-05 |
| liberal | PD_HY3 | psychencode | ENSG00000238228 | OR7E7P    | 3295 | 0.236848019 | 0.179465111 | 0.3190457 | 0.2417252 | 0.0229159 | 0.2646412 | 0.0948016 | 1.00E-05 |
| liberal | PD_HY3 | psychencode | ENSG00000249244 |           | 3404 | 1.99E-97    | 3.92E-98    | 0.8167958 | 0.1604180 | 0.0227862 | 0.1832042 | 0.1420429 | 1.00E-05 |
| liberal | PD_HY3 | psychencode | ENSG00000119866 | BCL11A    | 2643 | 0.49667515  | 0.333791065 | 0.0878018 | 0.0589846 | 0.0227474 | 0.0817320 | 0.3856506 | 1.00E-05 |
| liberal | PD_HY3 | eQTLGen     | ENSG00000145390 | USP53     | 4858 | 1.40E-304   | 2.15E-304   | 0.3852846 | 0.5920624 | 0.0226530 | 0.6147154 | 0.0382612 | 1.00E-05 |
| liberal | PD_HY3 | eQTLGen     | ENSG00000006453 | BAIAP2L1  | 4559 | 6.93E-84    | 5.88E-84    | 0.5286774 | 0.4486821 | 0.0226404 | 0.4713226 | 0.0504599 | 1.00E-05 |
| liberal | PD_HY3 | eQTLGen     | ENSG00000238228 | OR7E7P    | 4477 | 0.181416474 | 0.153823087 | 0.3475691 | 0.2946814 | 0.0225099 | 0.3171913 | 0.0763873 | 1.00E-05 |
| liberal | PD_HY3 | psychencode | ENSG00000213486 |           | 2733 | 0.485978033 | 0.337564417 | 0.0908734 | 0.0630990 | 0.0224851 | 0.0855841 | 0.3563472 | 1.00E-05 |
| liberal | PD_HY3 | psychencode | ENSG00000241524 | RN7SL632P | 2687 | 0.483093999 | 0.337403965 | 0.0926071 | 0.0646567 | 0.0222382 | 0.0868949 | 0.3439421 | 1.00E-05 |
| robust  | PD_HY3 | eQTLGen     | ENSG00000205356 | TECPR1    | 4709 | 3.45E-305   | 2.98E-305   | 0.5248841 | 0.4534962 | 0.0216197 | 0.4751159 | 0.0476733 | 5.00E-06 |
| liberal | PD_HY3 | psychencode | ENSG00000250950 |           | 3370 | 1.89E-17    | 3.78E-18    | 0.8157302 | 0.1627310 | 0.0215388 | 0.1842698 | 0.1323583 | 1.00E-05 |
| liberal | PD_HY3 | eQTLGen     | ENSG00000164713 | BRI3      | 4686 | 2.14E-117   | 1.84E-117   | 0.5258774 | 0.4526811 | 0.0214415 | 0.4741226 | 0.0473656 | 1.00E-05 |
| liberal | PD_HY3 | psychencode | ENSG00000245958 |           | 3369 | 5.93E-216   | 1.18E-216   | 0.8158924 | 0.1627497 | 0.0213579 | 0.1841076 | 0.1312316 | 1.00E-05 |
| liberal | PD_HY3 | eQTLGen     | ENSG00000164109 | MAD2L1    | 5638 | 7.55E-29    | 1.28E-28    | 0.3626645 | 0.6160094 | 0.0213261 | 0.6373355 | 0.0346197 | 1.00E-05 |
| liberal | PD_HY3 | psychencode | ENSG00000242735 |           | 2443 | 0.465517018 | 0.236774465 | 0.1834337 | 0.0932783 | 0.0209965 | 0.1142748 | 0.2250953 | 1.00E-05 |
| liberal | PD_HY3 | psychencode | ENSG00000170264 | FAM161A   | 2580 | 0.062022442 | 0.040198849 | 0.5324739 | 0.3450942 | 0.0202106 | 0.3653048 | 0.0585654 | 1.00E-05 |
| robust  | PD_HY3 | psychencode | ENSG00000213455 |           | 3088 | 0.329343505 | 0.24226749  | 0.2354018 | 0.1731235 | 0.0198637 | 0.1929872 | 0.1147373 | 5.00E-06 |
| robust  | PD_HY3 | psychencode | ENSG00000237058 |           | 2207 | 0.004808047 | 0.545288092 | 0.0037599 | 0.4263803 | 0.0197636 | 0.4461439 | 0.0463522 | 5.00E-06 |
| liberal | PD_HY3 | eQTLGen     | ENSG00000106236 | NPTX2     | 4176 | 5.66E-12    | 4.70E-12    | 0.5352669 | 0.4452157 | 0.0195173 | 0.4647331 | 0.0438379 | 1.00E-05 |
| liberal | PD_HY3 | psychencode | ENSG00000273302 |           | 2588 | 0.036866004 | 0.0253636   | 0.5440502 | 0.3742840 | 0.0194363 | 0.3937202 | 0.0519292 | 1.00E-05 |
| robust  | PD_HY3 | eQTLGen     | ENSG00000115421 | PAPOLG    | 4389 | 0.057281178 | 0.688845548 | 0.0180105 | 0.2165497 | 0.0193131 | 0.2358628 | 0.0891855 | 5.00E-06 |
| liberal | PD_HY3 | eQTLGen     | ENSG00000260091 |           | 4848 | 7.14E-300   | 2.53E-300   | 0.7246278 | 0.2562808 | 0.0190914 | 0.2753722 | 0.0744940 | 1.00E-05 |
| robust  | PD_HY3 | psychencode | ENSG00000157881 | PANK4     | 2123 | 0.004503573 | 0.508966224 | 0.0041017 | 0.4635123 | 0.0189162 | 0.4824285 | 0.0408105 | 5.00E-06 |
| liberal | PD_HY3 | eQTLGen     | ENSG00000197530 | MIB2      | 3046 | 0.006377989 | 0.778251278 | 0.0015973 | 0.1948865 | 0.0188870 | 0.2137734 | 0.0969127 | 1.00E-05 |
| liberal | PD_HY3 | psychencode | ENSG00000186889 | TMEM17    | 2427 | 3.29E-54    | 5.74E-55    | 0.8357276 | 0.1458642 | 0.0184082 | 0.1642724 | 0.1262008 | 1.00E-05 |
| robust  | PD_HY3 | psychencode | ENSG00000229393 |           | 2081 | 0.00427163  | 0.482396608 | 0.0043462 | 0.4907834 | 0.0182022 | 0.5089855 | 0.0370880 | 5.00E-06 |
| liberal | PD_HY3 | psychencode | ENSG00000227775 |           | 1248 | 0.001696952 | 0.197127055 | 0.0066830 | 0.7763113 | 0.0181817 | 0.7944930 | 0.0234207 | 1.00E-05 |
| liberal | PD_HY3 | psychencode | ENSG00000082898 | XPO1      | 2744 | 9.23E-08    | 6.43E-08    | 0.5787083 | 0.4031170 | 0.0181745 | 0.4212915 | 0.0450850 | 1.00E-05 |
| robust  | PD_HY3 | psychencode | ENSG00000173163 | COMMD1    | 2567 | 0.51130772  | 0.33051493  | 0.0851064 | 0.0549775 | 0.0180934 | 0.0730709 | 0.3291056 | 5.00E-06 |

|         |        |             |                 |           |      |             |             |           |           |           |           |           |          |
|---------|--------|-------------|-----------------|-----------|------|-------------|-------------|-----------|-----------|-----------|-----------|-----------|----------|
| robust  | PD_HY3 | psychencode | ENSG00000221048 |           | 3313 | 0.173164506 | 0.131605107 | 0.3847858 | 0.2924013 | 0.0180433 | 0.3104446 | 0.0617074 | 5.00E-06 |
| robust  | PD_HY3 | psychencode | ENSG00000164715 | LMTK2     | 3317 | 0.459995847 | 0.348579669 | 0.0987366 | 0.0747857 | 0.0179021 | 0.0926878 | 0.2393790 | 5.00E-06 |
| robust  | PD_HY3 | psychencode | ENSG00000227284 | MARK2P10  | 2726 | 0.508618093 | 0.330759467 | 0.0865170 | 0.0562271 | 0.0178783 | 0.0741054 | 0.3179652 | 5.00E-06 |
| liberal | PD_HY3 | eQTLGen     | ENSG00000250412 | KLHL2P1   | 4849 | 0.089368772 | 0.142487475 | 0.2893669 | 0.4613424 | 0.0174344 | 0.4787768 | 0.0377905 | 1.00E-05 |
| liberal | PD_HY3 | psychencode | ENSG00000164109 | MAD2L1    | 4018 | 0.008046038 | 0.001824568 | 0.7929448 | 0.1797956 | 0.0173891 | 0.1971846 | 0.0967157 | 1.00E-05 |
| liberal | PD_HY3 | eQTLGen     | ENSG00000248280 |           | 4844 | 4.39E-300   | 2.21E-300   | 0.6542228 | 0.3284114 | 0.0173658 | 0.3457772 | 0.0528781 | 1.00E-05 |
| robust  | PD_HY3 | psychencode | ENSG00000271146 |           | 2575 | 0.397600737 | 0.273248165 | 0.1851095 | 0.1271814 | 0.0168602 | 0.1440416 | 0.1325685 | 5.00E-06 |
| liberal | PD_HY3 | psychencode | ENSG00000150961 | SEC24D    | 3355 | 0.263331725 | 0.040336748 | 0.5893614 | 0.0902608 | 0.0167094 | 0.1069701 | 0.1851231 | 1.00E-05 |
| robust  | PD_HY3 | psychencode | ENSG00000006453 | BAIAP2L1  | 3133 | 0.393120328 | 0.289842997 | 0.1729576 | 0.1274864 | 0.0165927 | 0.1440791 | 0.1301524 | 5.00E-06 |
| liberal | PD_HY3 | eQTLGen     | ENSG00000178636 |           | 4918 | 5.87E-50    | 1.60E-50    | 0.7731919 | 0.2104604 | 0.0163477 | 0.2268081 | 0.0776761 | 1.00E-05 |
| robust  | PD_HY3 | psychencode | ENSG00000231859 |           | 3310 | 0.433090054 | 0.329152861 | 0.1258414 | 0.0956081 | 0.0163075 | 0.1119157 | 0.1705661 | 5.00E-06 |
| robust  | PD_HY3 | psychencode | ENSG00000215914 | MMP23A    | 1242 | 0.003720043 | 0.431634959 | 0.0046870 | 0.5437949 | 0.0161632 | 0.5599580 | 0.0297229 | 5.00E-06 |
| robust  | PD_HY3 | psychencode | ENSG00000145390 | USP53     | 3410 | 1.08E-23    | 1.92E-24    | 0.8349431 | 0.1490060 | 0.0160509 | 0.1650569 | 0.1077199 | 5.00E-06 |
| robust  | PD_HY3 | psychencode | ENSG00000232713 |           | 2698 | 0.323051341 | 0.227105212 | 0.2548077 | 0.1790980 | 0.0159378 | 0.1950358 | 0.0889890 | 5.00E-06 |
| robust  | PD_HY3 | psychencode | ENSG00000224475 |           | 3050 | 0.476004679 | 0.348481423 | 0.0922394 | 0.0674966 | 0.0157780 | 0.0832745 | 0.2337597 | 5.00E-06 |
| liberal | PD_HY3 | psychencode | ENSG00000243554 |           | 3310 | 0.027254386 | 0.020672015 | 0.5324543 | 0.4038422 | 0.0157771 | 0.4196193 | 0.0390674 | 1.00E-05 |
| robust  | PD_HY3 | psychencode | ENSG00000227361 | RPS24P7   | 2621 | 0.452803091 | 0.298757169 | 0.1402568 | 0.0925094 | 0.0156735 | 0.1081829 | 0.1694263 | 5.00E-06 |
| robust  | PD_HY3 | psychencode | ENSG00000166448 | TMEM130   | 2492 | 0.454717359 | 0.329713191 | 0.1159343 | 0.0840322 | 0.0156029 | 0.0996351 | 0.1856782 | 5.00E-06 |
| robust  | PD_HY3 | psychencode | ENSG00000231764 | DLX6-AS1  | 2867 | 0.473660848 | 0.32142743  | 0.1128321 | 0.0765371 | 0.0155426 | 0.0920796 | 0.2030725 | 5.00E-06 |
| liberal | PD_HY3 | psychencode | ENSG00000145388 | METTL14   | 3385 | 0.081146522 | 0.0117134   | 0.7791760 | 0.1124576 | 0.0155066 | 0.1279641 | 0.1378880 | 1.00E-05 |
| robust  | PD_HY3 | psychencode | ENSG00000196636 | ACN9      | 2953 | 0.476069304 | 0.340119154 | 0.0982008 | 0.0701268 | 0.0154840 | 0.0856108 | 0.2207994 | 5.00E-06 |
| robust  | PD_HY3 | psychencode | ENSG00000164096 | C4orf3    | 3353 | 0.412773915 | 0.076216312 | 0.4183856 | 0.0772217 | 0.0154025 | 0.0926242 | 0.1994588 | 5.00E-06 |
| liberal | PD_HY3 | psychencode | ENSG00000162928 | PEX13     | 2632 | 5.51E-18    | 3.87E-18    | 0.5783876 | 0.4062202 | 0.0153922 | 0.4216124 | 0.0378912 | 1.00E-05 |
| robust  | PD_HY3 | psychencode | ENSG00000226046 |           | 3181 | 0.469860634 | 0.35097105  | 0.0938339 | 0.0700604 | 0.0152739 | 0.0853344 | 0.2180106 | 5.00E-06 |
| robust  | PD_HY3 | psychencode | ENSG00000106236 | NPTX2     | 2931 | 0.458508661 | 0.336130848 | 0.1096993 | 0.0803896 | 0.0152716 | 0.0956612 | 0.1899697 | 5.00E-06 |
| robust  | PD_HY3 | psychencode | ENSG00000271707 | ATP1B3P1  | 2615 | 0.512780735 | 0.349189769 | 0.0731076 | 0.0497539 | 0.0151680 | 0.0649219 | 0.3048604 | 5.00E-06 |
| robust  | PD_HY3 | psychencode | ENSG00000214389 | RPS3AP26  | 3182 | 0.480312867 | 0.354967755 | 0.0860148 | 0.0635376 | 0.0151670 | 0.0787045 | 0.2387085 | 5.00E-06 |
| robust  | PD_HY3 | psychencode | ENSG00000226744 |           | 3381 | 0.449077862 | 0.340511093 | 0.1110883 | 0.0842019 | 0.0151208 | 0.0993227 | 0.1795779 | 5.00E-06 |
| liberal | PD_HY3 | psychencode | ENSG00000183444 | OR7E38P   | 3306 | 0.004779763 | 0.003624445 | 0.5553692 | 0.4211156 | 0.0151110 | 0.4362266 | 0.0358833 | 1.00E-05 |
| robust  | PD_HY3 | psychencode | ENSG00000244318 | RN7SL252P | 2742 | 0.499423017 | 0.323015135 | 0.0986717 | 0.0637883 | 0.0151018 | 0.0788902 | 0.2367493 | 5.00E-06 |
| robust  | PD_HY3 | psychencode | ENSG00000271956 | DLX6-AS2  | 2854 | 0.462191351 | 0.304087188 | 0.1319640 | 0.0867925 | 0.0149649 | 0.1017574 | 0.1724217 | 5.00E-06 |
| robust  | PD_HY3 | psychencode | ENSG00000199475 | RN7SKP104 | 3111 | 0.460367096 | 0.340865842 | 0.1056457 | 0.0781925 | 0.0149288 | 0.0931213 | 0.1909235 | 5.00E-06 |
| robust  | PD_HY3 | psychencode | ENSG00000232032 |           | 3310 | 0.45248589  | 0.344150166 | 0.1071281 | 0.0814495 | 0.0147864 | 0.0962359 | 0.1815402 | 5.00E-06 |
| robust  | PD_HY3 | psychencode | ENSG00000231812 |           | 3359 | 0.437611638 | 0.331917975 | 0.1227014 | 0.0930366 | 0.0147323 | 0.1077690 | 0.1583498 | 5.00E-06 |

|         |        |             |                 |           |      |             |             |           |           |           |           |           |          |
|---------|--------|-------------|-----------------|-----------|------|-------------|-------------|-----------|-----------|-----------|-----------|-----------|----------|
| robust  | PD_HY3 | psychencode | ENSG0000006377  | DLX6      | 2848 | 0.511673953 | 0.330931612 | 0.0866563 | 0.0560166 | 0.0147215 | 0.0707381 | 0.2628059 | 5.00E-06 |
| robust  | PD_HY3 | psychencode | ENSG00000237818 | RPS3AP29  | 3327 | 0.386021733 | 0.293289487 | 0.1739038 | 0.1320983 | 0.0146867 | 0.1467850 | 0.1111800 | 5.00E-06 |
| robust  | PD_HY3 | psychencode | ENSG00000228414 |           | 2707 | 0.466371106 | 0.326191205 | 0.1134409 | 0.0793140 | 0.0146828 | 0.0939968 | 0.1851226 | 5.00E-06 |
| robust  | PD_HY3 | psychencode | ENSG00000224551 | HMGB3P21  | 2980 | 0.46656871  | 0.335630474 | 0.1065235 | 0.0765993 | 0.0146779 | 0.0912773 | 0.1916197 | 5.00E-06 |
| robust  | PD_HY3 | psychencode | ENSG00000263819 | RN7SL478P | 3326 | 0.476075034 | 0.361342708 | 0.0841026 | 0.0638049 | 0.0146748 | 0.0784796 | 0.2299945 | 5.00E-06 |
| liberal | PD_HY3 | psychencode | ENSG00000224387 |           | 2079 | 0.001600737 | 0.180749799 | 0.0070497 | 0.7960184 | 0.0145813 | 0.8105997 | 0.0183178 | 1.00E-05 |
| robust  | PD_HY3 | psychencode | ENSG00000232097 |           | 3287 | 0.455607766 | 0.344862484 | 0.1053363 | 0.0797031 | 0.0144904 | 0.0941935 | 0.1818047 | 5.00E-06 |
| robust  | PD_HY3 | psychencode | ENSG00000205356 | TECPR1    | 3395 | 0.439192295 | 0.333763181 | 0.1208117 | 0.0917816 | 0.0144512 | 0.1062329 | 0.1574521 | 5.00E-06 |
| liberal | PD_HY3 | eQTLGen     | ENSG00000070669 | ASNS      | 4609 | 1.36E-304   | 1.16E-304   | 0.5320730 | 0.4535547 | 0.0143723 | 0.4679270 | 0.0316880 | 1.00E-05 |
| robust  | PD_HY3 | psychencode | ENSG00000105880 | DLX5      | 2877 | 0.482457243 | 0.33567792  | 0.0987957 | 0.0687101 | 0.0143590 | 0.0830691 | 0.2089797 | 5.00E-06 |
| liberal | PD_HY3 | psychencode | ENSG00000270335 |           | 2457 | 0.680392904 | 0.135836728 | 0.1412897 | 0.0281934 | 0.0142873 | 0.0424807 | 0.5067582 | 1.00E-05 |
| liberal | PD_HY3 | psychencode | ENSG00000070669 | ASNS      | 3383 | 9.89E-14    | 7.50E-14    | 0.5606487 | 0.4251474 | 0.0142039 | 0.4393513 | 0.0334093 | 1.00E-05 |
| robust  | PD_HY3 | psychencode | ENSG00000164713 | BRI3      | 3396 | 0.254939413 | 0.193755821 | 0.3052316 | 0.2319500 | 0.0141231 | 0.2460732 | 0.0608887 | 5.00E-06 |
| robust  | PD_HY3 | psychencode | ENSG00000135175 | OCM2      | 3318 | 0.406310806 | 0.30829762  | 0.1542595 | 0.1170197 | 0.0141123 | 0.1311320 | 0.1205977 | 5.00E-06 |
| robust  | PD_HY3 | psychencode | ENSG00000237024 |           | 2687 | 0.487924159 | 0.341189119 | 0.0923127 | 0.0645231 | 0.0140510 | 0.0785741 | 0.2177668 | 5.00E-06 |
| liberal | PD_HY3 | psychencode | ENSG00000006128 | TAC1      | 3320 | 0.000728663 | 0.000544916 | 0.5634124 | 0.4213227 | 0.0139913 | 0.4353140 | 0.0332081 | 1.00E-05 |
| liberal | PD_HY3 | psychencode | ENSG00000228541 |           | 2434 | 0.700794757 | 0.123151869 | 0.1379181 | 0.0242227 | 0.0139126 | 0.0381353 | 0.5743642 | 1.00E-05 |
| robust  | PD_HY3 | psychencode | ENSG00000221245 |           | 3465 | 0.621265175 | 0.131260534 | 0.1928799 | 0.0407238 | 0.0138705 | 0.0545943 | 0.3406000 | 5.00E-06 |
| liberal | PD_HY3 | eQTLGen     | ENSG00000183444 | OR7E38P   | 4497 | 2.99E-47    | 2.54E-47    | 0.5335140 | 0.4528105 | 0.0136755 | 0.4664860 | 0.0302014 | 1.00E-05 |
| liberal | PD_HY3 | psychencode | ENSG00000250938 |           | 4018 | 0.57174812  | 0.12965307  | 0.2323264 | 0.0526701 | 0.0136023 | 0.0662724 | 0.2582546 | 1.00E-05 |
| robust  | PD_HY3 | psychencode | ENSG00000230702 |           | 2576 | 0.511587252 | 0.331497792 | 0.0869884 | 0.0563395 | 0.0135871 | 0.0699266 | 0.2411650 | 5.00E-06 |
| robust  | PD_HY3 | psychencode | ENSG00000225905 |           | 913  | 0.003268484 | 0.38485384  | 0.0050392 | 0.5933192 | 0.0135193 | 0.6068385 | 0.0227859 | 5.00E-06 |
| robust  | PD_HY3 | psychencode | ENSG00000272950 |           | 3304 | 1.16E-24    | 8.70E-25    | 0.5629338 | 0.4236234 | 0.0134428 | 0.4370662 | 0.0317330 | 5.00E-06 |
| liberal | PD_HY3 | psychencode | ENSG00000250219 | LTV1P1    | 3953 | 0.571218848 | 0.128459615 | 0.2342709 | 0.0526711 | 0.0133795 | 0.0660506 | 0.2540203 | 1.00E-05 |
| robust  | PD_HY3 | psychencode | ENSG00000235982 |           | 3363 | 0.389186035 | 0.295206366 | 0.1718903 | 0.1303559 | 0.0133614 | 0.1437173 | 0.1024996 | 5.00E-06 |
| robust  | PD_HY3 | eQTLGen     | ENSG00000196636 | ACN9      | 4165 | 3.04E-35    | 2.42E-35    | 0.5488318 | 0.4379936 | 0.0131746 | 0.4511682 | 0.0300794 | 5.00E-06 |
| robust  | PD_HY3 | psychencode | ENSG00000242158 | RN7SL361P | 2616 | 0.42675456  | 0.288965179 | 0.1616657 | 0.1094412 | 0.0131734 | 0.1226146 | 0.1203699 | 5.00E-06 |
| robust  | PD_HY3 | psychencode | ENSG00000236498 |           | 2574 | 0.516426579 | 0.333620924 | 0.0832050 | 0.0537259 | 0.0130216 | 0.0667475 | 0.2423712 | 5.00E-06 |
| robust  | PD_HY3 | eQTLGen     | ENSG00000180535 | BHLHA15   | 4709 | 0.335151823 | 0.289909735 | 0.1941219 | 0.1678916 | 0.0129250 | 0.1808166 | 0.0769842 | 5.00E-06 |
| liberal | PD_HY3 | psychencode | ENSG00000249409 |           | 4254 | 0.572542566 | 0.182633578 | 0.1758353 | 0.0560762 | 0.0129123 | 0.0689886 | 0.2302641 | 1.00E-05 |
| liberal | PD_HY3 | psychencode | ENSG00000225665 |           | 4044 | 0.582424135 | 0.15507807  | 0.1971205 | 0.0524730 | 0.0129043 | 0.0653773 | 0.2459225 | 1.00E-05 |
| robust  | PD_HY3 | psychencode | ENSG00000212978 |           | 2583 | 1.52E-20    | 1.04E-20    | 0.5846764 | 0.4024602 | 0.0128634 | 0.4153236 | 0.0319619 | 5.00E-06 |
| robust  | PD_HY3 | psychencode | ENSG00000115421 | PAPOLG    | 2665 | 0.473809918 | 0.329487399 | 0.1084995 | 0.0754250 | 0.0127782 | 0.0882032 | 0.1694164 | 5.00E-06 |
| robust  | PD_HY3 | psychencode | ENSG00000162924 | REL       | 2707 | 0.49944921  | 0.349326829 | 0.0814902 | 0.0569707 | 0.0127630 | 0.0697337 | 0.2240272 | 5.00E-06 |

|         |        |             |                 |           |      |             |             |           |           |           |           |           |          |
|---------|--------|-------------|-----------------|-----------|------|-------------|-------------|-----------|-----------|-----------|-----------|-----------|----------|
| robust  | PD_HY3 | eQTLGen     | ENSG00000214389 | RPS3AP26  | 4439 | 0.424574222 | 0.353208919 | 0.1143631 | 0.0951147 | 0.0127390 | 0.1078537 | 0.1339329 | 5.00E-06 |
| robust  | PD_HY3 | psychencode | ENSG00000234624 |           | 2617 | 0.510084591 | 0.351627325 | 0.0743338 | 0.0512166 | 0.0127377 | 0.0639543 | 0.2487028 | 5.00E-06 |
| robust  | PD_HY3 | psychencode | ENSG00000229839 |           | 2442 | 0.516643706 | 0.262768279 | 0.1378224 | 0.0700720 | 0.0126937 | 0.0827656 | 0.1811519 | 5.00E-06 |
| liberal | PD_HY3 | psychencode | ENSG00000267520 |           | 2699 | 0.000982892 | 0.000690323 | 0.5790459 | 0.4066738 | 0.0126071 | 0.4192809 | 0.0310005 | 1.00E-05 |
| robust  | PD_HY3 | psychencode | ENSG00000271134 |           | 2615 | 0.45461688  | 0.307174892 | 0.1347550 | 0.0910262 | 0.0124270 | 0.1034532 | 0.1365207 | 5.00E-06 |
| robust  | PD_HY3 | psychencode | ENSG00000178636 |           | 3410 | 0.414542225 | 0.073996167 | 0.4235080 | 0.0755718 | 0.0123818 | 0.0879536 | 0.1638422 | 5.00E-06 |
| liberal | PD_HY3 | eQTLGen     | ENSG00000243554 |           | 4503 | 2.01E-19    | 1.71E-19    | 0.5341905 | 0.4535109 | 0.0122986 | 0.4658095 | 0.0271187 | 1.00E-05 |
| robust  | PD_HY3 | psychencode | ENSG00000229831 |           | 2611 | 0.511275644 | 0.334993703 | 0.0855095 | 0.0560024 | 0.0122188 | 0.0682212 | 0.2181837 | 5.00E-06 |
| robust  | PD_HY3 | eQTLGen     | ENSG00000142611 | PRDM16    | 4240 | 0.007707808 | 0.881917673 | 0.0008511 | 0.0973572 | 0.0121663 | 0.1095234 | 0.1249651 | 5.00E-06 |
| robust  | PD_HY3 | eQTLGen     | ENSG00000115464 | USP34     | 3993 | 7.13E-64    | 8.49E-63    | 0.0764969 | 0.9114222 | 0.0120809 | 0.9235031 | 0.0132550 | 5.00E-06 |
| liberal | PD_HY3 | psychencode | ENSG00000233702 |           | 2428 | 0.714879127 | 0.124818949 | 0.1262194 | 0.0220260 | 0.0120565 | 0.0340825 | 0.5473731 | 1.00E-05 |
| robust  | PD_HY3 | psychencode | ENSG00000115484 | CCT4      | 2568 | 0.484354457 | 0.313163051 | 0.1156788 | 0.0747690 | 0.0120347 | 0.0868036 | 0.1609583 | 5.00E-06 |
| robust  | PD_HY3 | psychencode | ENSG00000270820 |           | 2664 | 0.424800672 | 0.294304015 | 0.1589144 | 0.1100729 | 0.0119081 | 0.1219809 | 0.1081836 | 5.00E-06 |
| robust  | PD_HY3 | eQTLGen     | ENSG00000164715 | LMTK2     | 4603 | 2.06E-182   | 1.76E-182   | 0.5321435 | 0.4560068 | 0.0118498 | 0.4678565 | 0.0259860 | 5.00E-06 |
| robust  | PD_HY3 | psychencode | ENSG00000271243 |           | 2769 | 0.504430829 | 0.351687614 | 0.0778162 | 0.0542296 | 0.0118357 | 0.0660653 | 0.2182524 | 5.00E-06 |
| robust  | PD_HY3 | psychencode | ENSG00000213495 |           | 2595 | 0.47539573  | 0.321327463 | 0.1142666 | 0.0772110 | 0.0117992 | 0.0890102 | 0.1528173 | 5.00E-06 |
| robust  | PD_HY3 | psychencode | ENSG00000172399 | MYOZZ     | 3455 | 1.66E-07    | 2.98E-08    | 0.8378870 | 0.1503738 | 0.0117389 | 0.1621128 | 0.0780650 | 5.00E-06 |
| liberal | PD_HY3 | psychencode | ENSG00000260091 |           | 3394 | 0.625069677 | 0.12298761  | 0.2007676 | 0.0394910 | 0.0116842 | 0.0511752 | 0.2958691 | 1.00E-05 |
| robust  | PD_HY3 | psychencode | ENSG00000115464 | USP34     | 2581 | 0.500602501 | 0.344089535 | 0.0851461 | 0.0585019 | 0.0116599 | 0.0701619 | 0.1993083 | 5.00E-06 |
| liberal | PD_HY3 | eQTLGen     | ENSG00000189409 | MMP23B    | 3070 | 0.004684818 | 0.570908946 | 0.0033599 | 0.4094340 | 0.0116124 | 0.4210464 | 0.0283620 | 1.00E-05 |
| robust  | PD_HY3 | psychencode | ENSG00000238228 | OR7E7P    | 3295 | 0.23959327  | 0.18154525  | 0.3227437 | 0.2445270 | 0.0115908 | 0.2561178 | 0.0474008 | 5.00E-06 |
| robust  | PD_HY3 | psychencode | ENSG00000249244 |           | 3404 | 2.02E-97    | 3.96E-98    | 0.8262089 | 0.1622667 | 0.0115244 | 0.1737911 | 0.0710214 | 5.00E-06 |
| robust  | PD_HY3 | psychencode | ENSG00000119866 | BCL11A    | 2643 | 0.502389181 | 0.337631185 | 0.0888119 | 0.0596631 | 0.0115046 | 0.0711677 | 0.1928253 | 5.00E-06 |
| robust  | PD_HY3 | eQTLGen     | ENSG00000145390 | USP53     | 4858 | 1.42E-304   | 2.18E-304   | 0.3896985 | 0.5988452 | 0.0114563 | 0.6103015 | 0.0191306 | 5.00E-06 |
| robust  | PD_HY3 | eQTLGen     | ENSG00000006453 | BAIAP2L1  | 4559 | 7.01E-84    | 5.95E-84    | 0.5347307 | 0.4538195 | 0.0114498 | 0.4652693 | 0.0252299 | 5.00E-06 |
| robust  | PD_HY3 | eQTLGen     | ENSG00000238228 | OR7E7P    | 4477 | 0.183481551 | 0.155574066 | 0.3515255 | 0.2980358 | 0.0113831 | 0.3094189 | 0.0381936 | 5.00E-06 |
| liberal | PD_HY3 | psychencode | ENSG00000248280 |           | 3369 | 0.596376822 | 0.11893777  | 0.2278718 | 0.0454340 | 0.0113796 | 0.0568136 | 0.2504645 | 1.00E-05 |
| robust  | PD_HY3 | psychencode | ENSG00000213486 |           | 2733 | 0.491503798 | 0.34140266  | 0.0919067 | 0.0638164 | 0.0113704 | 0.0751868 | 0.1781736 | 5.00E-06 |
| liberal | PD_HY3 | psychencode | ENSG00000250392 |           | 3841 | 0.629567319 | 0.140543572 | 0.1787344 | 0.0398891 | 0.0112656 | 0.0511547 | 0.2824243 | 1.00E-05 |
| robust  | PD_HY3 | psychencode | ENSG00000241524 | RN7SL632P | 2687 | 0.488525961 | 0.341197772 | 0.0936484 | 0.0653837 | 0.0112441 | 0.0766278 | 0.1719711 | 5.00E-06 |
| liberal | PD_HY3 | psychencode | ENSG00000170340 | B3GNT2    | 2393 | 0.70320871  | 0.143928643 | 0.1178415 | 0.0241082 | 0.0109130 | 0.0350211 | 0.4526657 | 1.00E-05 |
| robust  | PD_HY3 | psychencode | ENSG00000250950 |           | 3370 | 1.91E-17    | 3.82E-18    | 0.8246107 | 0.1645026 | 0.0108866 | 0.1753893 | 0.0661792 | 5.00E-06 |
| robust  | PD_HY3 | eQTLGen     | ENSG00000164713 | BRI3      | 4686 | 2.16E-117   | 1.86E-117   | 0.5315763 | 0.4575868 | 0.0108369 | 0.4684237 | 0.0236828 | 5.00E-06 |
| liberal | PD_HY3 | psychencode | ENSG00000172403 | SYNPO2    | 3367 | 0.581450838 | 0.100774797 | 0.2616143 | 0.0453311 | 0.0108290 | 0.0561601 | 0.2388858 | 1.00E-05 |



|         |        |             |                 |          |      |             |             |           |           |           |           |           |          |
|---------|--------|-------------|-----------------|----------|------|-------------|-------------|-----------|-----------|-----------|-----------|-----------|----------|
| liberal | PD_HY3 | psychencode | ENSG00000173209 | AHSA2    | 2586 | 1.60E-47    | 1.10E-47    | 0.5859557 | 0.4032314 | 0.0108129 | 0.4140443 | 0.0268157 | 1.00E-05 |
| robust  | PD_HY3 | psychencode | ENSG00000245958 |          | 3369 | 5.99E-216   | 1.19E-216   | 0.8246994 | 0.1645064 | 0.0107942 | 0.1753006 | 0.0656158 | 5.00E-06 |
| robust  | PD_HY3 | eQTLGen     | ENSG00000164109 | MAD2L1   | 5638 | 7.64E-29    | 1.30E-28    | 0.3665733 | 0.6226488 | 0.0107780 | 0.6334267 | 0.0173099 | 5.00E-06 |
| liberal | PD_HY3 | psychencode | ENSG00000271657 |          | 2403 | 0.708917352 | 0.145514773 | 0.1118873 | 0.0229556 | 0.0107250 | 0.0336806 | 0.4672046 | 1.00E-05 |
| robust  | PD_HY3 | psychencode | ENSG00000242735 |          | 2443 | 0.470455985 | 0.239286557 | 0.1853799 | 0.0942680 | 0.0106096 | 0.1048776 | 0.1125476 | 5.00E-06 |
| liberal | PD_HY3 | psychencode | ENSG00000241625 | RN7SL18P | 2423 | 0.710893942 | 0.12409432  | 0.1315476 | 0.0229526 | 0.0105116 | 0.0334642 | 0.4579714 | 1.00E-05 |
| liberal | PD_HY3 | eQTLGen     | ENSG00000164096 | C4orf3   | 4840 | 7.26E-260   | 1.19E-259   | 0.3744798 | 0.6152303 | 0.0102899 | 0.6255202 | 0.0167253 | 1.00E-05 |
| liberal | PD_HY3 | psychencode | ENSG00000271889 |          | 2584 | 0.014228679 | 0.009795228 | 0.5719902 | 0.3937561 | 0.0102298 | 0.4039859 | 0.0259801 | 1.00E-05 |
| robust  | PD_HY3 | psychencode | ENSG00000170264 | FAM161A  | 2580 | 0.062655595 | 0.040609217 | 0.5379097 | 0.3486171 | 0.0102084 | 0.3588255 | 0.0292827 | 5.00E-06 |
| robust  | PD_HY3 | eQTLGen     | ENSG00000106236 | NPTX2    | 4176 | 5.71E-12    | 4.75E-12    | 0.5405419 | 0.4496033 | 0.0098548 | 0.4594581 | 0.0219190 | 5.00E-06 |
| robust  | PD_HY3 | psychencode | ENSG00000273302 |          | 2588 | 0.037227788 | 0.025612506 | 0.5493892 | 0.3779570 | 0.0098135 | 0.3877705 | 0.0259646 | 5.00E-06 |
| robust  | PD_HY3 | eQTLGen     | ENSG00000260091 |          | 4848 | 7.21E-300   | 2.55E-300   | 0.7316115 | 0.2587508 | 0.0096377 | 0.2683885 | 0.0372470 | 5.00E-06 |
| liberal | PD_HY3 | psychencode | ENSG00000239958 | RN7SL51P | 2402 | 0.726237566 | 0.147081486 | 0.0974021 | 0.0197168 | 0.0095620 | 0.0292789 | 0.4849681 | 1.00E-05 |
| robust  | PD_HY3 | eQTLGen     | ENSG00000197530 | MIB2     | 3046 | 0.006438793 | 0.785670749 | 0.0016125 | 0.1967444 | 0.0095335 | 0.2062779 | 0.0484564 | 5.00E-06 |
| liberal | PD_HY3 | psychencode | ENSG00000237651 | C2orf74  | 2583 | 1.57E-284   | 1.08E-284   | 0.5866872 | 0.4038376 | 0.0094753 | 0.4133128 | 0.0234631 | 1.00E-05 |
| liberal | PD_HY3 | psychencode | ENSG00000162929 | KIAA1841 | 2595 | 7.17E-16    | 4.94E-16    | 0.5868170 | 0.4037305 | 0.0094524 | 0.4131830 | 0.0234128 | 1.00E-05 |
| robust  | PD_HY3 | psychencode | ENSG00000186889 | TMEM17   | 2427 | 3.32E-54    | 5.79E-55    | 0.8434912 | 0.1472192 | 0.0092896 | 0.1565088 | 0.0631004 | 5.00E-06 |
| liberal | PD_HY3 | psychencode | ENSG00000253825 |          | 4015 | 0.659353285 | 0.149481283 | 0.1482900 | 0.0336094 | 0.0092661 | 0.0428755 | 0.2756986 | 1.00E-05 |
| robust  | PD_HY3 | psychencode | ENSG00000227775 |          | 1248 | 0.00171252  | 0.198935552 | 0.0067443 | 0.7834334 | 0.0091743 | 0.7926076 | 0.0117103 | 5.00E-06 |
| robust  | PD_HY3 | psychencode | ENSG00000082898 | XPO1     | 2744 | 9.31E-08    | 6.49E-08    | 0.5840154 | 0.4068138 | 0.0091706 | 0.4159844 | 0.0225425 | 5.00E-06 |
| liberal | PD_HY3 | psychencode | ENSG00000249002 |          | 3477 | 0.699026704 | 0.124973047 | 0.1415891 | 0.0253044 | 0.0091067 | 0.0344111 | 0.3598860 | 1.00E-05 |
| liberal | PD_HY3 | psychencode | ENSG00000145384 | FABP2    | 3367 | 0.671598046 | 0.124677818 | 0.1644085 | 0.0305126 | 0.0088031 | 0.0393157 | 0.2885070 | 1.00E-05 |
| robust  | PD_HY3 | eQTLGen     | ENSG00000250412 | KLHL2P1  | 4849 | 0.090154667 | 0.143740487 | 0.2919116 | 0.4653994 | 0.0087938 | 0.4741933 | 0.0188953 | 5.00E-06 |
| robust  | PD_HY3 | psychencode | ENSG00000164109 | MAD2L1   | 4018 | 0.008116608 | 0.001840571 | 0.7998995 | 0.1813725 | 0.0087708 | 0.1901433 | 0.0483578 | 5.00E-06 |
| robust  | PD_HY3 | eQTLGen     | ENSG00000248280 |          | 4844 | 4.43E-300   | 2.23E-300   | 0.6599531 | 0.3312880 | 0.0087589 | 0.3400469 | 0.0264390 | 5.00E-06 |
| liberal | PD_HY3 | eQTLGen     | ENSG00000245958 |          | 4938 | 4.31E-179   | 7.34E-179   | 0.3671960 | 0.6242734 | 0.0085307 | 0.6328040 | 0.0136649 | 1.00E-05 |
| robust  | PD_HY3 | psychencode | ENSG00000150961 | SEC24D   | 3355 | 0.265550312 | 0.040676588 | 0.5943268 | 0.0910212 | 0.0084251 | 0.0994463 | 0.0925616 | 5.00E-06 |
| robust  | PD_HY3 | eQTLGen     | ENSG00000178636 |          | 4918 | 5.92E-50    | 1.61E-50    | 0.7795639 | 0.2121948 | 0.0082412 | 0.2204361 | 0.0388381 | 5.00E-06 |
| robust  | PD_HY3 | psychencode | ENSG00000243554 |          | 3310 | 0.027471093 | 0.020836384 | 0.5366880 | 0.4070533 | 0.0079513 | 0.4150046 | 0.0195337 | 5.00E-06 |
| robust  | PD_HY3 | psychencode | ENSG00000145388 | METTL14  | 3385 | 0.08178059  | 0.011804926 | 0.7852643 | 0.1133363 | 0.0078139 | 0.1211502 | 0.0689440 | 5.00E-06 |
| robust  | PD_HY3 | psychencode | ENSG00000162928 | PEX13    | 2632 | 5.55E-18    | 3.90E-18    | 0.5828735 | 0.4093708 | 0.0077558 | 0.4171265 | 0.0189456 | 5.00E-06 |
| robust  | PD_HY3 | psychencode | ENSG00000183444 | OR7E38P  | 3306 | 0.004816152 | 0.003652038 | 0.5595972 | 0.4243215 | 0.0076130 | 0.4319346 | 0.0179416 | 5.00E-06 |
| liberal | PD_HY3 | eQTLGen     | ENSG00000145388 | METTL14  | 4764 | 1.16E-59    | 1.62E-59    | 0.4137137 | 0.5787027 | 0.0075836 | 0.5862863 | 0.0131045 | 1.00E-05 |
| robust  | PD_HY3 | psychencode | ENSG00000224387 |          | 2079 | 0.001612493 | 0.182077261 | 0.0071015 | 0.8018645 | 0.0073442 | 0.8092087 | 0.0091589 | 5.00E-06 |

|         |        |             |                 |          |      |             |             |           |           |           |           |           |          |
|---------|--------|-------------|-----------------|----------|------|-------------|-------------|-----------|-----------|-----------|-----------|-----------|----------|
| robust  | PD_HY3 | eQTLGen     | ENSG00000070669 | ASNS     | 4609 | 1.37E-304   | 1.17E-304   | 0.5359242 | 0.4568376 | 0.0072381 | 0.4640758 | 0.0158440 | 5.00E-06 |
| robust  | PD_HY3 | psychencode | ENSG00000270335 |          | 2457 | 0.685288347 | 0.136814077 | 0.1423063 | 0.0283963 | 0.0071950 | 0.0355913 | 0.2533791 | 5.00E-06 |
| robust  | PD_HY3 | psychencode | ENSG00000070669 | ASNS     | 3383 | 9.96E-14    | 7.56E-14    | 0.5646589 | 0.4281884 | 0.0071527 | 0.4353411 | 0.0167046 | 5.00E-06 |
| robust  | PD_HY3 | psychencode | ENSG00000006128 | TAC1     | 3320 | 0.000733797 | 0.000548755 | 0.5673816 | 0.4242909 | 0.0070449 | 0.4313358 | 0.0166041 | 5.00E-06 |
| robust  | PD_HY3 | psychencode | ENSG00000228541 |          | 2434 | 0.705703856 | 0.124014554 | 0.1388842 | 0.0243923 | 0.0070050 | 0.0313974 | 0.2871821 | 5.00E-06 |
| liberal | PD_HY3 | eQTLGen     | ENSG00000170264 | FAM161A  | 3914 | 7.24E-08    | 8.57E-07    | 0.0773776 | 0.9156313 | 0.0069902 | 0.9226215 | 0.0076343 | 1.00E-05 |
| robust  | PD_HY3 | eQTLGen     | ENSG00000183444 | OR7E38P  | 4497 | 3.01E-47    | 2.56E-47    | 0.5371871 | 0.4559281 | 0.0068848 | 0.4628129 | 0.0151007 | 5.00E-06 |
| robust  | PD_HY3 | psychencode | ENSG00000250938 |          | 4018 | 0.575663293 | 0.130540899 | 0.2339173 | 0.0530308 | 0.0068477 | 0.0598785 | 0.1291273 | 5.00E-06 |
| liberal | PD_HY3 | eQTLGen     | ENSG00000172403 | SYNPO2   | 4943 | 5.74E-66    | 8.65E-66    | 0.3959878 | 0.5972764 | 0.0067359 | 0.6040122 | 0.0112776 | 1.00E-05 |
| robust  | PD_HY3 | psychencode | ENSG00000250219 | LTV1P1   | 3953 | 0.575065902 | 0.129324767 | 0.2358487 | 0.0530258 | 0.0067348 | 0.0597606 | 0.1270102 | 5.00E-06 |
| robust  | PD_HY3 | psychencode | ENSG00000249409 |          | 4254 | 0.57626302  | 0.183820354 | 0.1769779 | 0.0564406 | 0.0064981 | 0.0629388 | 0.1151321 | 5.00E-06 |
| robust  | PD_HY3 | psychencode | ENSG00000225665 |          | 4044 | 0.586206426 | 0.156085154 | 0.1984006 | 0.0528138 | 0.0064940 | 0.0593078 | 0.1229613 | 5.00E-06 |
| robust  | PD_HY3 | psychencode | ENSG00000267520 |          | 2699 | 0.000989127 | 0.000694703 | 0.5827191 | 0.4092536 | 0.0063435 | 0.4155971 | 0.0155003 | 5.00E-06 |
| robust  | PD_HY3 | eQTLGen     | ENSG00000243554 |          | 4503 | 2.03E-19    | 1.72E-19    | 0.5374957 | 0.4563169 | 0.0061874 | 0.4625043 | 0.0135593 | 5.00E-06 |
| robust  | PD_HY3 | psychencode | ENSG00000233702 |          | 2428 | 0.719214719 | 0.12557595  | 0.1269849 | 0.0221596 | 0.0060648 | 0.0282244 | 0.2736866 | 5.00E-06 |
| liberal | PD_HY3 | psychencode | ENSG00000178821 | TMEM52   | 1498 | 0.000625398 | 0.071568032 | 0.0079858 | 0.9138544 | 0.0059664 | 0.9198208 | 0.0065288 | 1.00E-05 |
| robust  | PD_HY3 | psychencode | ENSG00000260091 |          | 3394 | 0.628742844 | 0.123710336 | 0.2019474 | 0.0397231 | 0.0058764 | 0.0455995 | 0.1479345 | 5.00E-06 |
| robust  | PD_HY3 | eQTLGen     | ENSG00000189409 | MMP23B   | 3070 | 0.004712178 | 0.574243103 | 0.0033795 | 0.4118251 | 0.0058401 | 0.4176652 | 0.0141810 | 5.00E-06 |
| robust  | PD_HY3 | psychencode | ENSG00000248280 |          | 3369 | 0.599789504 | 0.119618375 | 0.2291758 | 0.0456940 | 0.0057224 | 0.0514163 | 0.1252322 | 5.00E-06 |
| robust  | PD_HY3 | psychencode | ENSG00000250392 |          | 3841 | 0.63313365  | 0.141339713 | 0.1797468 | 0.0401151 | 0.0056647 | 0.0457798 | 0.1412121 | 5.00E-06 |
| robust  | PD_HY3 | psychencode | ENSG00000170340 | B3GNT2   | 2393 | 0.707066803 | 0.144718295 | 0.1184880 | 0.0242405 | 0.0054864 | 0.0297269 | 0.2263328 | 5.00E-06 |
| robust  | PD_HY3 | psychencode | ENSG00000172403 | SYNPO2   | 3367 | 0.584616232 | 0.101323411 | 0.2630385 | 0.0455779 | 0.0054440 | 0.0510219 | 0.1194429 | 5.00E-06 |
| robust  | PD_HY3 | psychencode | ENSG00000173209 | AHSA2    | 2586 | 1.61E-47    | 1.11E-47    | 0.5891409 | 0.4054233 | 0.0054359 | 0.4108591 | 0.0134078 | 5.00E-06 |
| robust  | PD_HY3 | psychencode | ENSG00000271657 |          | 2403 | 0.712739409 | 0.146299301 | 0.1124905 | 0.0230794 | 0.0053914 | 0.0284708 | 0.2336023 | 5.00E-06 |
| robust  | PD_HY3 | psychencode | ENSG00000241625 | RN7SL18P | 2423 | 0.714650005 | 0.124749982 | 0.1322426 | 0.0230738 | 0.0052836 | 0.0283574 | 0.2289857 | 5.00E-06 |
| liberal | PD_HY3 | eQTLGen     | ENSG00000162928 | PEX13    | 4173 | 2.53E-17    | 3.04E-16    | 0.0764220 | 0.9183169 | 0.0052611 | 0.9235780 | 0.0057291 | 1.00E-05 |
| robust  | PD_HY3 | eQTLGen     | ENSG00000164096 | C4orf3   | 4840 | 7.29E-260   | 1.20E-259   | 0.3764165 | 0.6184120 | 0.0051716 | 0.6235835 | 0.0083627 | 5.00E-06 |
| robust  | PD_HY3 | psychencode | ENSG00000271889 |          | 2584 | 0.014301832 | 0.009845588 | 0.5749309 | 0.3957805 | 0.0051412 | 0.4009217 | 0.0129900 | 5.00E-06 |
| robust  | PD_HY3 | psychencode | ENSG00000239958 | RN7SL51P | 2402 | 0.7297264   | 0.147788063 | 0.0978700 | 0.0198115 | 0.0048040 | 0.0246155 | 0.2424840 | 5.00E-06 |
| robust  | PD_HY3 | psychencode | ENSG00000237651 | C2orf74  | 2583 | 1.57E-284   | 1.08E-284   | 0.5894799 | 0.4057599 | 0.0047602 | 0.4105201 | 0.0117315 | 5.00E-06 |
| robust  | PD_HY3 | psychencode | ENSG00000162929 | KIAA1841 | 2595 | 7.21E-16    | 4.96E-16    | 0.5896036 | 0.4056477 | 0.0047487 | 0.4103964 | 0.0117064 | 5.00E-06 |
| robust  | PD_HY3 | psychencode | ENSG00000253825 |          | 4015 | 0.662422309 | 0.150177058 | 0.1489802 | 0.0337658 | 0.0046546 | 0.0384204 | 0.1378493 | 5.00E-06 |
| robust  | PD_HY3 | psychencode | ENSG00000249002 |          | 3477 | 0.702224178 | 0.125544696 | 0.1422368 | 0.0254202 | 0.0045742 | 0.0299943 | 0.1799430 | 5.00E-06 |
| robust  | PD_HY3 | psychencode | ENSG00000145384 | FABP2    | 3367 | 0.674567183 | 0.125229019 | 0.1651353 | 0.0306475 | 0.0044210 | 0.0350685 | 0.1442535 | 5.00E-06 |

|         |        |             |                 |          |      |             |             |           |           |           |           |           |          |
|---------|--------|-------------|-----------------|----------|------|-------------|-------------|-----------|-----------|-----------|-----------|-----------|----------|
| robust  | PD_HY3 | eQTLGen     | ENSG00000245958 |          | 4938 | 4.33E-179   | 7.37E-179   | 0.3687689 | 0.6269475 | 0.0042836 | 0.6312311 | 0.0068325 | 5.00E-06 |
| robust  | PD_HY3 | eQTLGen     | ENSG00000145388 | METTL14  | 4764 | 1.17E-59    | 1.63E-59    | 0.4152884 | 0.5809054 | 0.0038062 | 0.5847116 | 0.0065522 | 5.00E-06 |
| liberal | PD_HY3 | eQTLGen     | ENSG00000119866 | BCL11A   | 4561 | 2.41E-05    | 8.78E-05    | 0.2146097 | 0.7816835 | 0.0035949 | 0.7852784 | 0.0045989 | 1.00E-05 |
| liberal | PD_HY3 | eQTLGen     | ENSG00000267520 |          | 4276 | 5.30E-22    | 6.37E-21    | 0.0765830 | 0.9198663 | 0.0035507 | 0.9234170 | 0.0038600 | 1.00E-05 |
| liberal | PD_HY3 | psychencode | ENSG00000008128 | CDK11A   | 1248 | 0.000233238 | 0.02709417  | 0.0082715 | 0.9608601 | 0.0035410 | 0.9644011 | 0.0036852 | 1.00E-05 |
| robust  | PD_HY3 | eQTLGen     | ENSG00000170264 | FAM161A  | 3914 | 7.27E-08    | 8.60E-07    | 0.0776490 | 0.9188427 | 0.0035073 | 0.9223501 | 0.0038171 | 5.00E-06 |
| robust  | PD_HY3 | eQTLGen     | ENSG00000172403 | SYNPO2   | 4943 | 5.76E-66    | 8.68E-66    | 0.3973259 | 0.5992947 | 0.0033793 | 0.6026741 | 0.0056388 | 5.00E-06 |
| robust  | PD_HY3 | psychencode | ENSG00000178821 | TMEM52   | 1498 | 0.000627269 | 0.071782173 | 0.0080097 | 0.9165888 | 0.0029921 | 0.9195809 | 0.0032644 | 5.00E-06 |
| liberal | PD_HY3 | eQTLGen     | ENSG00000228541 |          | 3661 | 1.50E-15    | 1.36E-14    | 0.0991268 | 0.8981800 | 0.0026932 | 0.9008732 | 0.0029985 | 1.00E-05 |
| robust  | PD_HY3 | eQTLGen     | ENSG00000162928 | PEX13    | 4173 | 2.53E-17    | 3.04E-16    | 0.0766235 | 0.9207390 | 0.0026375 | 0.9233765 | 0.0028645 | 5.00E-06 |
| liberal | PD_HY3 | eQTLGen     | ENSG00000078369 | GNB1     | 3278 | 0.000977368 | 0.118400654 | 0.0071894 | 0.8709351 | 0.0024975 | 0.8734326 | 0.0028677 | 1.00E-05 |
| liberal | PD_HY3 | eQTLGen     | ENSG00000173163 | COMMD1   | 3819 | 1.61E-20    | 1.87E-19    | 0.0790508 | 0.9184532 | 0.0024960 | 0.9209492 | 0.0027176 | 1.00E-05 |
| liberal | PD_HY3 | eQTLGen     | ENSG00000237522 | NONOP2   | 4296 | 1.61E-05    | 0.000193411 | 0.0766567 | 0.9209285 | 0.0022053 | 0.9231338 | 0.0023947 | 1.00E-05 |
| liberal | PD_HY3 | eQTLGen     | ENSG00000162929 | KIAA1841 | 4104 | 5.89E-306   | 7.05E-305   | 0.0769997 | 0.9208340 | 0.0021663 | 0.9230003 | 0.0023526 | 1.00E-05 |
| liberal | PD_HY3 | eQTLGen     | ENSG00000186889 | TMEM17   | 3679 | 4.34E-06    | 3.74E-05    | 0.1036644 | 0.8941505 | 0.0021433 | 0.8962938 | 0.0023970 | 1.00E-05 |
| liberal | PD_HY3 | eQTLGen     | ENSG00000115484 | CCT4     | 3895 | 2.22E-132   | 2.63E-131   | 0.0777781 | 0.9201806 | 0.0020414 | 0.9222219 | 0.0022184 | 1.00E-05 |
| liberal | PD_HY3 | eQTLGen     | ENSG00000173209 | AHSA2    | 4087 | 3.64E-305   | 4.35E-304   | 0.0770748 | 0.9209978 | 0.0019274 | 0.9229252 | 0.0020927 | 1.00E-05 |
| liberal | PD_HY3 | eQTLGen     | ENSG00000082898 | XPO1     | 4108 | 4.84E-07    | 5.77E-06    | 0.0772832 | 0.9208376 | 0.0018730 | 0.9227105 | 0.0020340 | 1.00E-05 |
| robust  | PD_HY3 | eQTLGen     | ENSG00000119866 | BCL11A   | 4561 | 2.41E-05    | 8.80E-05    | 0.2149962 | 0.7830910 | 0.0018007 | 0.7848917 | 0.0022995 | 5.00E-06 |
| robust  | PD_HY3 | eQTLGen     | ENSG00000267520 |          | 4276 | 5.31E-22    | 6.38E-21    | 0.0767192 | 0.9215023 | 0.0017785 | 0.9232808 | 0.0019300 | 5.00E-06 |
| robust  | PD_HY3 | psychencode | ENSG00000008128 | CDK11A   | 1248 | 0.000233652 | 0.027142225 | 0.0082862 | 0.9625643 | 0.0017736 | 0.9643379 | 0.0018426 | 5.00E-06 |
| liberal | PD_HY3 | eQTLGen     | ENSG00000205090 | TMEM240  | 2835 | 0.00012071  | 0.014894486 | 0.0079052 | 0.9754177 | 0.0016620 | 0.9770797 | 0.0017038 | 1.00E-05 |
| liberal | PD_HY3 | eQTLGen     | ENSG00000170340 | B3GNT2   | 3668 | 9.36E-305   | 9.52E-304   | 0.0894255 | 0.9089629 | 0.0016116 | 0.9105745 | 0.0017730 | 1.00E-05 |
| liberal | PD_HY3 | psychencode | ENSG00000175756 | AURKAIP1 | 862  | 9.31E-05    | 0.005743076 | 0.0158375 | 0.9767179 | 0.0016084 | 0.9783263 | 0.0016468 | 1.00E-05 |
| liberal | PD_HY3 | eQTLGen     | ENSG00000232713 |          | 4272 | 7.34E-11    | 8.82E-10    | 0.0767344 | 0.9217852 | 0.0014804 | 0.9232656 | 0.0016060 | 1.00E-05 |
| liberal | PD_HY3 | eQTLGen     | ENSG00000175756 | AURKAIP1 | 2415 | 0.000302502 | 0.01964862  | 0.0148387 | 0.9638279 | 0.0013823 | 0.9652102 | 0.0014342 | 1.00E-05 |
| robust  | PD_HY3 | eQTLGen     | ENSG00000228541 |          | 3661 | 1.51E-15    | 1.36E-14    | 0.0992605 | 0.8993911 | 0.0013484 | 0.9007395 | 0.0014992 | 5.00E-06 |
| robust  | PD_HY3 | eQTLGen     | ENSG00000078369 | GNB1     | 3278 | 0.00097859  | 0.118548695 | 0.0071984 | 0.8720240 | 0.0012503 | 0.8732744 | 0.0014338 | 5.00E-06 |
| robust  | PD_HY3 | eQTLGen     | ENSG00000173163 | COMMD1   | 3819 | 1.61E-20    | 1.87E-19    | 0.0791496 | 0.9196008 | 0.0012496 | 0.9208504 | 0.0013588 | 5.00E-06 |
| liberal | PD_HY3 | eQTLGen     | ENSG00000212978 |          | 4076 | 9.04E-125   | 1.08E-123   | 0.0771040 | 0.9216621 | 0.0012339 | 0.9228960 | 0.0013388 | 1.00E-05 |
| robust  | PD_HY3 | eQTLGen     | ENSG00000237522 | NONOP2   | 4296 | 1.61E-05    | 0.000193625 | 0.0767413 | 0.9219451 | 0.0011039 | 0.9230490 | 0.0011973 | 5.00E-06 |
| robust  | PD_HY3 | eQTLGen     | ENSG00000162929 | KIAA1841 | 4104 | 5.90E-306   | 7.05E-305   | 0.0770832 | 0.9218325 | 0.0010843 | 0.9229168 | 0.0011763 | 5.00E-06 |
| robust  | PD_HY3 | eQTLGen     | ENSG00000186889 | TMEM17   | 3679 | 4.34E-06    | 3.75E-05    | 0.1037757 | 0.8951097 | 0.0010728 | 0.8961825 | 0.0011985 | 5.00E-06 |
| liberal | PD_HY3 | eQTLGen     | ENSG00000221978 | CCNL2    | 2461 | 0.000218754 | 0.026198256 | 0.0080536 | 0.9645037 | 0.0010258 | 0.9655294 | 0.0010635 | 1.00E-05 |

|         |        |             |                  |          |      |             |             |           |           |           |           |           |          |
|---------|--------|-------------|------------------|----------|------|-------------|-------------|-----------|-----------|-----------|-----------|-----------|----------|
| robust  | PD_HY3 | eQTLGen     | ENSG00000115484  | CCT4     | 3895 | 2.22E-132   | 2.63E-131   | 0.0778575 | 0.9211207 | 0.0010217 | 0.9221425 | 0.0011092 | 5.00E-06 |
| robust  | PD_HY3 | eQTLGen     | ENSG00000173209  | AHSA2    | 4087 | 3.64E-305   | 4.35E-304   | 0.0771492 | 0.9218862 | 0.0009646 | 0.9228508 | 0.0010463 | 5.00E-06 |
| robust  | PD_HY3 | eQTLGen     | ENSG00000082898  | XPO1     | 4108 | 4.85E-07    | 5.78E-06    | 0.0773557 | 0.9217007 | 0.0009374 | 0.9226381 | 0.0010170 | 5.00E-06 |
| robust  | PD_HY3 | eQTLGen     | ENSG00000205090  | TMEM240  | 2835 | 0.000120811 | 0.014906873 | 0.0079117 | 0.9762289 | 0.0008317 | 0.9770606 | 0.0008519 | 5.00E-06 |
| robust  | PD_HY3 | eQTLGen     | ENSG00000170340  | B3GNT2   | 3668 | 9.37E-305   | 9.53E-304   | 0.0894976 | 0.9096959 | 0.0008064 | 0.9105024 | 0.0008865 | 5.00E-06 |
| robust  | PD_HY3 | psychencode | ENSG00000175756  | AURKAIP1 | 862  | 9.32E-05    | 0.005747698 | 0.0158502 | 0.9775040 | 0.0008049 | 0.9783089 | 0.0008234 | 5.00E-06 |
| liberal | PD_HY3 | psychencode | ENSG00000235098  | ANKRD65  | 917  | 2.55E-92    | 3.00E-90    | 0.0084180 | 0.9907987 | 0.0007834 | 0.9915820 | 0.0007906 | 1.00E-05 |
| liberal | PD_HY3 | eQTLGen     | ENSG00000008128  | CDK11A   | 3089 | 2.26E-19    | 2.75E-17    | 0.0081310 | 0.9911106 | 0.0007584 | 0.9918690 | 0.0007652 | 1.00E-05 |
| robust  | PD_HY3 | eQTLGen     | ENSG00000232713  |          | 4272 | 7.34E-11    | 8.82E-10    | 0.0767912 | 0.9224680 | 0.0007407 | 0.9232088 | 0.0008030 | 5.00E-06 |
| robust  | PD_HY3 | eQTLGen     | ENSG00000175756  | AURKAIP1 | 2415 | 0.000302711 | 0.01966221  | 0.0148490 | 0.9644945 | 0.0006916 | 0.9651861 | 0.0007171 | 5.00E-06 |
| liberal | PD_HY3 | eQTLGen     | ENSG00000231050  |          | 3298 | 2.71E-215   | 3.27E-213   | 0.0082308 | 0.9910780 | 0.0006913 | 0.9917692 | 0.0006975 | 1.00E-05 |
| liberal | PD_HY3 | eQTLGen     | ENSG00000235098  | ANKRD65  | 2530 | 1.36E-22    | 1.70E-20    | 0.0079578 | 0.9913955 | 0.0006466 | 0.9920422 | 0.0006522 | 1.00E-05 |
| liberal | PD_HY3 | eQTLGen     | ENSG00000269227  |          | 3059 | 1.99E-43    | 2.42E-41    | 0.0081363 | 0.9912189 | 0.0006448 | 0.9918637 | 0.0006505 | 1.00E-05 |
| liberal | PD_HY3 | eQTLGen     | ENSG00000269737  |          | 3059 | 1.51E-49    | 1.85E-47    | 0.0081363 | 0.9912189 | 0.0006448 | 0.9918637 | 0.0006505 | 1.00E-05 |
| robust  | PD_HY3 | eQTLGen     | ENSG000000212978 |          | 4076 | 9.04E-125   | 1.08E-123   | 0.0771516 | 0.9222310 | 0.0006173 | 0.9228484 | 0.0006694 | 5.00E-06 |
| liberal | PD_HY3 | eQTLGen     | ENSG00000160072  | ATAD3B   | 2724 | 5.58E-33    | 6.90E-31    | 0.0080131 | 0.9913940 | 0.0005930 | 0.9919869 | 0.0005981 | 1.00E-05 |
| liberal | PD_HY3 | eQTLGen     | ENSG00000215915  | ATAD3C   | 2672 | 1.60E-17    | 1.99E-15    | 0.0080008 | 0.9914072 | 0.0005920 | 0.9919992 | 0.0005971 | 1.00E-05 |
| liberal | PD_HY3 | eQTLGen     | ENSG00000157933  | SKI      | 3692 | 7.34E-16    | 8.54E-14    | 0.0085178 | 0.9909244 | 0.0005578 | 0.9914822 | 0.0005629 | 1.00E-05 |
| liberal | PD_HY3 | psychencode | ENSG00000271847  |          | 1989 | 3.43E-05    | 0.0038758   | 0.0087278 | 0.9868060 | 0.0005562 | 0.9873622 | 0.0005636 | 1.00E-05 |
| robust  | PD_HY3 | eQTLGen     | ENSG00000221978  | CCNL2    | 2461 | 0.000218866 | 0.0262117   | 0.0080577 | 0.9649986 | 0.0005132 | 0.9655117 | 0.0005318 | 5.00E-06 |
| liberal | PD_HY3 | eQTLGen     | ENSG00000225931  |          | 3781 | 1.20E-12    | 1.40E-10    | 0.0085073 | 0.9909836 | 0.0005091 | 0.9914927 | 0.0005137 | 1.00E-05 |
| liberal | PD_HY3 | eQTLGen     | ENSG00000248333  | CDK11B   | 3066 | 2.80E-55    | 3.41E-53    | 0.0081371 | 0.9913840 | 0.0004788 | 0.9918629 | 0.0004830 | 1.00E-05 |
| liberal | PD_HY3 | eQTLGen     | ENSG00000008130  | NADK     | 3100 | 1.81E-06    | 0.000220581 | 0.0081301 | 0.9911688 | 0.0004787 | 0.9916475 | 0.0004829 | 1.00E-05 |
| liberal | PD_HY3 | eQTLGen     | ENSG00000228037  |          | 3788 | 4.93E-26    | 5.74E-24    | 0.0085065 | 0.9910158 | 0.0004777 | 0.9914935 | 0.0004821 | 1.00E-05 |
| liberal | PD_HY3 | eQTLGen     | ENSG00000224870  |          | 2474 | 1.77E-55    | 2.17E-53    | 0.0080797 | 0.9914637 | 0.0004566 | 0.9919203 | 0.0004606 | 1.00E-05 |
| liberal | PD_HY3 | psychencode | ENSG00000268575  |          | 1248 | 6.70E-104   | 7.78E-102   | 0.0085311 | 0.9910201 | 0.0004488 | 0.9914689 | 0.0004528 | 1.00E-05 |
| liberal | PD_HY3 | eQTLGen     | ENSG00000268575  |          | 3094 | 1.37E-181   | 1.67E-179   | 0.0081337 | 0.9914416 | 0.0004247 | 0.9918663 | 0.0004284 | 1.00E-05 |
| robust  | PD_HY3 | psychencode | ENSG00000235098  | ANKRD65  | 917  | 2.55E-92    | 3.00E-90    | 0.0084213 | 0.9911869 | 0.0003918 | 0.9915787 | 0.0003953 | 5.00E-06 |
| liberal | PD_HY3 | psychencode | ENSG00000224870  |          | 887  | 3.61E-07    | 4.17E-05    | 0.0085816 | 0.9909917 | 0.0003847 | 0.9913764 | 0.0003882 | 1.00E-05 |
| robust  | PD_HY3 | eQTLGen     | ENSG00000008128  | CDK11A   | 3089 | 2.26E-19    | 2.75E-17    | 0.0081341 | 0.9914865 | 0.0003793 | 0.9918659 | 0.0003826 | 5.00E-06 |
| liberal | PD_HY3 | eQTLGen     | ENSG00000215912  | TTC34    | 4067 | 6.03E-32    | 7.01E-30    | 0.0085340 | 0.9911075 | 0.0003585 | 0.9914660 | 0.0003617 | 1.00E-05 |
| robust  | PD_HY3 | eQTLGen     | ENSG00000231050  |          | 3298 | 2.72E-215   | 3.27E-213   | 0.0082336 | 0.9914206 | 0.0003458 | 0.9917664 | 0.0003488 | 5.00E-06 |
| liberal | PD_HY3 | eQTLGen     | ENSG00000215790  | SLC35E2  | 3089 | 1.71E-23    | 2.08E-21    | 0.0081345 | 0.9915387 | 0.0003267 | 0.9918655 | 0.0003295 | 1.00E-05 |
| robust  | PD_HY3 | eQTLGen     | ENSG00000235098  | ANKRD65  | 2530 | 1.36E-22    | 1.70E-20    | 0.0079604 | 0.9917162 | 0.0003234 | 0.9920396 | 0.0003261 | 5.00E-06 |

|         |        |             |                 |          |      |           |             |           |           |           |           |           |          |
|---------|--------|-------------|-----------------|----------|------|-----------|-------------|-----------|-----------|-----------|-----------|-----------|----------|
| robust  | PD_HY3 | eQTLGen     | ENSG00000269227 |          | 3059 | 1.99E-43  | 2.42E-41    | 0.0081389 | 0.9915386 | 0.0003225 | 0.9918611 | 0.0003253 | 5.00E-06 |
| robust  | PD_HY3 | eQTLGen     | ENSG00000269737 |          | 3059 | 1.52E-49  | 1.85E-47    | 0.0081389 | 0.9915386 | 0.0003225 | 0.9918611 | 0.0003253 | 5.00E-06 |
| robust  | PD_HY3 | eQTLGen     | ENSG00000160072 | ATAD3B   | 2724 | 5.58E-33  | 6.90E-31    | 0.0080154 | 0.9916880 | 0.0002966 | 0.9919846 | 0.0002991 | 5.00E-06 |
| robust  | PD_HY3 | eQTLGen     | ENSG00000215915 | ATAD3C   | 2672 | 1.60E-17  | 1.99E-15    | 0.0080032 | 0.9917008 | 0.0002961 | 0.9919968 | 0.0002986 | 5.00E-06 |
| liberal | PD_HY3 | psychencode | ENSG00000215912 | TTC34    | 2207 | 8.58E-06  | 0.000973179 | 0.0087293 | 0.9900017 | 0.0002873 | 0.9902890 | 0.0002902 | 1.00E-05 |
| robust  | PD_HY3 | eQTLGen     | ENSG00000157933 | SKI      | 3692 | 7.35E-16  | 8.55E-14    | 0.0085202 | 0.9912009 | 0.0002790 | 0.9914798 | 0.0002815 | 5.00E-06 |
| robust  | PD_HY3 | psychencode | ENSG00000271847 |          | 1989 | 3.43E-05  | 0.003876878 | 0.0087302 | 0.9870805 | 0.0002782 | 0.9873587 | 0.0002818 | 5.00E-06 |
| liberal | PD_HY3 | eQTLGen     | ENSG00000189339 | SLC35E2B | 3082 | 1.38E-65  | 1.69E-63    | 0.0081373 | 0.9915928 | 0.0002699 | 0.9918627 | 0.0002722 | 1.00E-05 |
| liberal | PD_HY3 | eQTLGen     | ENSG00000227775 |          | 3093 | 2.81E-21  | 3.43E-19    | 0.0081351 | 0.9916082 | 0.0002567 | 0.9918649 | 0.0002589 | 1.00E-05 |
| robust  | PD_HY3 | eQTLGen     | ENSG00000225931 |          | 3781 | 1.20E-12  | 1.40E-10    | 0.0085095 | 0.9912359 | 0.0002546 | 0.9914905 | 0.0002568 | 5.00E-06 |
| liberal | PD_HY3 | psychencode | ENSG00000215915 | ATAD3C   | 969  | 8.59E-08  | 1.01E-05    | 0.0084384 | 0.9913029 | 0.0002486 | 0.9915515 | 0.0002508 | 1.00E-05 |
| robust  | PD_HY3 | eQTLGen     | ENSG00000248333 | CDK11B   | 3066 | 2.80E-55  | 3.41E-53    | 0.0081391 | 0.9916214 | 0.0002395 | 0.9918609 | 0.0002415 | 5.00E-06 |
| robust  | PD_HY3 | eQTLGen     | ENSG00000008130 | NADK     | 3100 | 1.81E-06  | 0.000220634 | 0.0081321 | 0.9914061 | 0.0002394 | 0.9916455 | 0.0002415 | 5.00E-06 |
| robust  | PD_HY3 | eQTLGen     | ENSG00000228037 |          | 3788 | 4.93E-26  | 5.74E-24    | 0.0085085 | 0.9912526 | 0.0002389 | 0.9914915 | 0.0002410 | 5.00E-06 |
| robust  | PD_HY3 | eQTLGen     | ENSG00000224870 |          | 2474 | 1.77E-55  | 2.17E-53    | 0.0080815 | 0.9916901 | 0.0002284 | 0.9919185 | 0.0002303 | 5.00E-06 |
| liberal | PD_HY3 | psychencode | ENSG00000215790 | SLC35E2  | 1248 | 1.60E-36  | 1.85E-34    | 0.0085330 | 0.9912400 | 0.0002270 | 0.9914670 | 0.0002290 | 1.00E-05 |
| liberal | PD_HY3 | eQTLGen     | ENSG00000142606 | MMEL1    | 3865 | 8.57E-237 | 9.97E-235   | 0.0085186 | 0.9912547 | 0.0002267 | 0.9914814 | 0.0002287 | 1.00E-05 |
| liberal | PD_HY3 | psychencode | ENSG00000160075 | SSU72    | 1141 | 6.89E-17  | 8.06E-15    | 0.0084784 | 0.9912958 | 0.0002259 | 0.9915216 | 0.0002278 | 1.00E-05 |
| robust  | PD_HY3 | psychencode | ENSG00000268575 |          | 1248 | 6.70E-104 | 7.78E-102   | 0.0085330 | 0.9912425 | 0.0002244 | 0.9914670 | 0.0002264 | 5.00E-06 |
| liberal | PD_HY3 | eQTLGen     | ENSG00000178642 |          | 3732 | 5.35E-52  | 6.21E-50    | 0.0085432 | 0.9912333 | 0.0002235 | 0.9914568 | 0.0002255 | 1.00E-05 |
| liberal | PD_HY3 | psychencode | ENSG00000116151 | MORN1    | 2025 | 4.96E-07  | 5.60E-05    | 0.0087849 | 0.9909446 | 0.0002140 | 0.9911586 | 0.0002159 | 1.00E-05 |
| liberal | PD_HY3 | psychencode | ENSG00000157870 | FAM213B  | 2147 | 3.33E-07  | 3.77E-05    | 0.0087466 | 0.9910029 | 0.0002125 | 0.9912153 | 0.0002144 | 1.00E-05 |
| robust  | PD_HY3 | eQTLGen     | ENSG00000268575 |          | 3094 | 1.37E-181 | 1.67E-179   | 0.0081354 | 0.9916522 | 0.0002124 | 0.9918646 | 0.0002142 | 5.00E-06 |
| liberal | PD_HY3 | eQTLGen     | ENSG00000160075 | SSU72    | 2871 | 5.40E-306 | 6.66E-304   | 0.0080510 | 0.9917366 | 0.0002124 | 0.9919490 | 0.0002141 | 1.00E-05 |
| liberal | PD_HY3 | psychencode | ENSG00000162585 | C1orf86  | 1927 | 5.55E-15  | 6.28E-13    | 0.0087481 | 0.9910468 | 0.0002051 | 0.9912519 | 0.0002070 | 1.00E-05 |
| liberal | PD_HY3 | eQTLGen     | ENSG00000149527 | PLCH2    | 3746 | 8.72E-305 | 1.01E-302   | 0.0085421 | 0.9912543 | 0.0002036 | 0.9914579 | 0.0002054 | 1.00E-05 |
| liberal | PD_HY3 | eQTLGen     | ENSG00000169885 | CALML6   | 3417 | 2.43E-29  | 2.90E-27    | 0.0082864 | 0.9915116 | 0.0002020 | 0.9917136 | 0.0002037 | 1.00E-05 |
| liberal | PD_HY3 | eQTLGen     | ENSG00000197785 | ATAD3A   | 2793 | 3.90E-39  | 4.83E-37    | 0.0080223 | 0.9917844 | 0.0001933 | 0.9919777 | 0.0001949 | 1.00E-05 |
| liberal | PD_HY3 | eQTLGen     | ENSG00000187730 | GABRD    | 3568 | 1.29E-29  | 1.52E-27    | 0.0083860 | 0.9914207 | 0.0001933 | 0.9916140 | 0.0001950 | 1.00E-05 |
| robust  | PD_HY3 | psychencode | ENSG00000224870 |          | 887  | 3.61E-07  | 4.17E-05    | 0.0085832 | 0.9911823 | 0.0001924 | 0.9913747 | 0.0001941 | 5.00E-06 |
| liberal | PD_HY3 | eQTLGen     | ENSG00000224387 |          | 3723 | 4.65E-29  | 5.40E-27    | 0.0085353 | 0.9912726 | 0.0001921 | 0.9914647 | 0.0001938 | 1.00E-05 |
| liberal | PD_HY3 | eQTLGen     | ENSG00000228594 | C1orf233 | 2982 | 2.19E-08  | 2.68E-06    | 0.0081003 | 0.9917079 | 0.0001891 | 0.9918970 | 0.0001907 | 1.00E-05 |
| liberal | PD_HY3 | eQTLGen     | ENSG00000157916 | RER1     | 3807 | 2.21E-21  | 2.56E-19    | 0.0085525 | 0.9912589 | 0.0001885 | 0.9914475 | 0.0001902 | 1.00E-05 |
| liberal | PD_HY3 | eQTLGen     | ENSG00000215014 |          | 2882 | 1.86E-103 | 2.29E-101   | 0.0080672 | 0.9917471 | 0.0001857 | 0.9919328 | 0.0001872 | 1.00E-05 |

|         |        |             |                 |          |      |           |             |           |           |           |           |           |          |
|---------|--------|-------------|-----------------|----------|------|-----------|-------------|-----------|-----------|-----------|-----------|-----------|----------|
| liberal | PD_HY3 | eQTLGen     | ENSG00000269554 |          | 3729 | 1.06E-08  | 1.23E-06    | 0.0085093 | 0.9913045 | 0.0001850 | 0.9914895 | 0.0001867 | 1.00E-05 |
| liberal | PD_HY3 | eQTLGen     | ENSG00000162585 | C1orf86  | 3755 | 1.28E-299 | 1.49E-297   | 0.0085095 | 0.9913061 | 0.0001845 | 0.9914905 | 0.0001861 | 1.00E-05 |
| robust  | PD_HY3 | eQTLGen     | ENSG00000215912 | TTC34    | 4067 | 6.03E-32  | 7.01E-30    | 0.0085355 | 0.9912852 | 0.0001793 | 0.9914645 | 0.0001809 | 5.00E-06 |
| liberal | PD_HY3 | eQTLGen     | ENSG00000229393 |          | 3754 | 5.27E-18  | 6.12E-16    | 0.0085335 | 0.9912888 | 0.0001777 | 0.9914665 | 0.0001793 | 1.00E-05 |
| liberal | PD_HY3 | psychencode | ENSG00000157911 | PEX10    | 2050 | 2.05E-10  | 2.31E-08    | 0.0087893 | 0.9910392 | 0.0001714 | 0.9912107 | 0.0001730 | 1.00E-05 |
| robust  | PD_HY3 | eQTLGen     | ENSG00000215790 | SLC35E2  | 3089 | 1.71E-23  | 2.08E-21    | 0.0081359 | 0.9917007 | 0.0001634 | 0.9918641 | 0.0001648 | 5.00E-06 |
| liberal | PD_HY3 | eQTLGen     | ENSG00000157881 | PANK4    | 3801 | 1.21E-86  | 1.41E-84    | 0.0085276 | 0.9913090 | 0.0001634 | 0.9914724 | 0.0001648 | 1.00E-05 |
| liberal | PD_HY3 | eQTLGen     | ENSG00000182873 |          | 3731 | 4.17E-79  | 4.86E-77    | 0.0085090 | 0.9913311 | 0.0001599 | 0.9914910 | 0.0001613 | 1.00E-05 |
| liberal | PD_HY3 | eQTLGen     | ENSG00000157870 | FAM213B  | 3819 | 5.19E-304 | 6.05E-302   | 0.0085063 | 0.9913370 | 0.0001567 | 0.9914937 | 0.0001580 | 1.00E-05 |
| liberal | PD_HY3 | eQTLGen     | ENSG00000215914 | MMP23A   | 3065 | 4.37E-15  | 5.32E-13    | 0.0081380 | 0.9917074 | 0.0001546 | 0.9918620 | 0.0001559 | 1.00E-05 |
| liberal | PD_HY3 | eQTLGen     | ENSG00000242485 | MRPL20   | 2492 | 2.62E-94  | 3.27E-92    | 0.0079474 | 0.9918983 | 0.0001543 | 0.9920526 | 0.0001556 | 1.00E-05 |
| liberal | PD_HY3 | psychencode | ENSG00000149527 | PLCH2    | 2038 | 7.98E-09  | 9.01E-07    | 0.0087877 | 0.9910576 | 0.0001537 | 0.9912114 | 0.0001551 | 1.00E-05 |
| liberal | PD_HY3 | eQTLGen     | ENSG00000157911 | PEX10    | 3799 | 2.02E-37  | 2.34E-35    | 0.0085534 | 0.9912959 | 0.0001507 | 0.9914466 | 0.0001520 | 1.00E-05 |
| liberal | PD_HY3 | psychencode | ENSG00000272420 |          | 1965 | 6.97E-19  | 7.88E-17    | 0.0087592 | 0.9910902 | 0.0001506 | 0.9912408 | 0.0001519 | 1.00E-05 |
| liberal | PD_HY3 | eQTLGen     | ENSG00000067606 | PRKCZ    | 3665 | 1.93E-51  | 2.27E-49    | 0.0084607 | 0.9913888 | 0.0001505 | 0.9915393 | 0.0001519 | 1.00E-05 |
| liberal | PD_HY3 | eQTLGen     | ENSG00000238164 |          | 3780 | 1.29E-18  | 1.51E-16    | 0.0085196 | 0.9913301 | 0.0001503 | 0.9914804 | 0.0001516 | 1.00E-05 |
| liberal | PD_HY3 | psychencode | ENSG00000269896 |          | 1958 | 2.44E-31  | 2.76E-29    | 0.0087574 | 0.9910958 | 0.0001469 | 0.9912426 | 0.0001482 | 1.00E-05 |
| liberal | PD_HY3 | eQTLGen     | ENSG00000269896 |          | 3735 | 9.82E-101 | 1.14E-98    | 0.0085255 | 0.9913305 | 0.0001440 | 0.9914745 | 0.0001453 | 1.00E-05 |
| robust  | PD_HY3 | psychencode | ENSG00000215912 | TTC34    | 2207 | 8.58E-06  | 0.000973319 | 0.0087305 | 0.9901439 | 0.0001437 | 0.9902876 | 0.0001451 | 5.00E-06 |
| liberal | PD_HY3 | eQTLGen     | ENSG00000116151 | MORN1    | 3746 | 5.20E-69  | 6.05E-67    | 0.0085271 | 0.9913294 | 0.0001434 | 0.9914729 | 0.0001447 | 1.00E-05 |
| liberal | PD_HY3 | eQTLGen     | ENSG00000157873 | TNFRSF14 | 3769 | 5.38E-306 | 6.26E-304   | 0.0085144 | 0.9913427 | 0.0001429 | 0.9914856 | 0.0001442 | 1.00E-05 |
| robust  | PD_HY3 | eQTLGen     | ENSG00000189339 | SLC35E2B | 3082 | 1.38E-65  | 1.69E-63    | 0.0081384 | 0.9917267 | 0.0001350 | 0.9918616 | 0.0001361 | 5.00E-06 |
| robust  | PD_HY3 | eQTLGen     | ENSG00000227775 |          | 3093 | 2.81E-21  | 3.43E-19    | 0.0081361 | 0.9917355 | 0.0001284 | 0.9918639 | 0.0001295 | 5.00E-06 |
| robust  | PD_HY3 | psychencode | ENSG00000215915 | ATAD3C   | 969  | 8.59E-08  | 1.01E-05    | 0.0084394 | 0.9914261 | 0.0001243 | 0.9915504 | 0.0001254 | 5.00E-06 |
| robust  | PD_HY3 | psychencode | ENSG00000215790 | SLC35E2  | 1248 | 1.60E-36  | 1.85E-34    | 0.0085340 | 0.9913525 | 0.0001135 | 0.9914660 | 0.0001145 | 5.00E-06 |
| robust  | PD_HY3 | eQTLGen     | ENSG00000142606 | MMEL1    | 3865 | 8.57E-237 | 9.97E-235   | 0.0085195 | 0.9913671 | 0.0001134 | 0.9914805 | 0.0001143 | 5.00E-06 |
| robust  | PD_HY3 | psychencode | ENSG00000160075 | SSU72    | 1141 | 6.89E-17  | 8.06E-15    | 0.0084793 | 0.9914077 | 0.0001129 | 0.9915207 | 0.0001139 | 5.00E-06 |
| robust  | PD_HY3 | eQTLGen     | ENSG00000178642 |          | 3732 | 5.35E-52  | 6.21E-50    | 0.0085441 | 0.9913441 | 0.0001118 | 0.9914559 | 0.0001128 | 5.00E-06 |
| robust  | PD_HY3 | psychencode | ENSG00000116151 | MORN1    | 2025 | 4.97E-07  | 5.60E-05    | 0.0087859 | 0.9910506 | 0.0001070 | 0.9911576 | 0.0001080 | 5.00E-06 |
| robust  | PD_HY3 | psychencode | ENSG00000157870 | FAM213B  | 2147 | 3.33E-07  | 3.77E-05    | 0.0087476 | 0.9911081 | 0.0001062 | 0.9912144 | 0.0001072 | 5.00E-06 |
| robust  | PD_HY3 | eQTLGen     | ENSG00000160075 | SSU72    | 2871 | 5.40E-306 | 6.66E-304   | 0.0080519 | 0.9918419 | 0.0001062 | 0.9919481 | 0.0001071 | 5.00E-06 |
| robust  | PD_HY3 | psychencode | ENSG00000162585 | C1orf86  | 1927 | 5.55E-15  | 6.28E-13    | 0.0087489 | 0.9911485 | 0.0001026 | 0.9912511 | 0.0001035 | 5.00E-06 |
| robust  | PD_HY3 | eQTLGen     | ENSG00000149527 | PLCH2    | 3746 | 8.72E-305 | 1.01E-302   | 0.0085430 | 0.9913552 | 0.0001018 | 0.9914570 | 0.0001027 | 5.00E-06 |
| robust  | PD_HY3 | eQTLGen     | ENSG00000169885 | CALML6   | 3417 | 2.43E-29  | 2.90E-27    | 0.0082872 | 0.9916117 | 0.0001010 | 0.9917128 | 0.0001019 | 5.00E-06 |

|        |        |             |                 |          |      |           |           |           |           |           |           |           |          |
|--------|--------|-------------|-----------------|----------|------|-----------|-----------|-----------|-----------|-----------|-----------|-----------|----------|
| robust | PD_HY3 | eQTLGen     | ENSG00000197785 | ATAD3A   | 2793 | 3.91E-39  | 4.83E-37  | 0.0080231 | 0.9918802 | 0.0000967 | 0.9919769 | 0.0000975 | 5.00E-06 |
| robust | PD_HY3 | eQTLGen     | ENSG00000187730 | GABRD    | 3568 | 1.29E-29  | 1.52E-27  | 0.0083868 | 0.9915165 | 0.0000967 | 0.9916132 | 0.0000975 | 5.00E-06 |
| robust | PD_HY3 | eQTLGen     | ENSG00000224387 |          | 3723 | 4.65E-29  | 5.40E-27  | 0.0085361 | 0.9913678 | 0.0000961 | 0.9914639 | 0.0000969 | 5.00E-06 |
| robust | PD_HY3 | eQTLGen     | ENSG00000228594 | C1orf233 | 2982 | 2.19E-08  | 2.68E-06  | 0.0081011 | 0.9918017 | 0.0000946 | 0.9918962 | 0.0000954 | 5.00E-06 |
| robust | PD_HY3 | eQTLGen     | ENSG00000157916 | RER1     | 3807 | 2.21E-21  | 2.56E-19  | 0.0085533 | 0.9913524 | 0.0000943 | 0.9914467 | 0.0000951 | 5.00E-06 |
| robust | PD_HY3 | eQTLGen     | ENSG00000215014 |          | 2882 | 1.86E-103 | 2.29E-101 | 0.0080680 | 0.9918392 | 0.0000929 | 0.9919320 | 0.0000936 | 5.00E-06 |
| robust | PD_HY3 | eQTLGen     | ENSG00000269554 |          | 3729 | 1.06E-08  | 1.23E-06  | 0.0085100 | 0.9913962 | 0.0000925 | 0.9914887 | 0.0000933 | 5.00E-06 |
| robust | PD_HY3 | eQTLGen     | ENSG00000162585 | C1orf86  | 3755 | 1.28E-299 | 1.49E-297 | 0.0085102 | 0.9913975 | 0.0000922 | 0.9914898 | 0.0000930 | 5.00E-06 |
| robust | PD_HY3 | eQTLGen     | ENSG00000229393 |          | 3754 | 5.27E-18  | 6.12E-16  | 0.0085342 | 0.9913769 | 0.0000889 | 0.9914658 | 0.0000897 | 5.00E-06 |
| robust | PD_HY3 | psychencode | ENSG00000157911 | PEX10    | 2050 | 2.05E-10  | 2.31E-08  | 0.0087901 | 0.9911242 | 0.0000857 | 0.9912099 | 0.0000865 | 5.00E-06 |
| robust | PD_HY3 | eQTLGen     | ENSG00000157881 | PANK4    | 3801 | 1.21E-86  | 1.41E-84  | 0.0085283 | 0.9913900 | 0.0000817 | 0.9914717 | 0.0000824 | 5.00E-06 |
| robust | PD_HY3 | eQTLGen     | ENSG00000182873 |          | 3731 | 4.17E-79  | 4.86E-77  | 0.0085097 | 0.9914103 | 0.0000800 | 0.9914903 | 0.0000806 | 5.00E-06 |
| robust | PD_HY3 | eQTLGen     | ENSG00000157870 | FAM213B  | 3819 | 5.19E-304 | 6.05E-302 | 0.0085070 | 0.9914147 | 0.0000783 | 0.9914930 | 0.0000790 | 5.00E-06 |
| robust | PD_HY3 | eQTLGen     | ENSG00000215914 | MMP23A   | 3065 | 4.37E-15  | 5.32E-13  | 0.0081386 | 0.9917841 | 0.0000773 | 0.9918614 | 0.0000780 | 5.00E-06 |
| robust | PD_HY3 | eQTLGen     | ENSG00000242485 | MRPL20   | 2492 | 2.62E-94  | 3.27E-92  | 0.0079480 | 0.9919748 | 0.0000772 | 0.9920520 | 0.0000778 | 5.00E-06 |
| robust | PD_HY3 | psychencode | ENSG00000149527 | PLCH2    | 2038 | 7.99E-09  | 9.01E-07  | 0.0087884 | 0.9911338 | 0.0000769 | 0.9912107 | 0.0000776 | 5.00E-06 |
| robust | PD_HY3 | eQTLGen     | ENSG00000157911 | PEX10    | 3799 | 2.02E-37  | 2.34E-35  | 0.0085541 | 0.9913706 | 0.0000754 | 0.9914459 | 0.0000760 | 5.00E-06 |
| robust | PD_HY3 | psychencode | ENSG00000272420 |          | 1965 | 6.97E-19  | 7.88E-17  | 0.0087598 | 0.9911649 | 0.0000753 | 0.9912402 | 0.0000760 | 5.00E-06 |
| robust | PD_HY3 | eQTLGen     | ENSG00000067606 | PRKCZ    | 3665 | 1.93E-51  | 2.27E-49  | 0.0084613 | 0.9914634 | 0.0000753 | 0.9915387 | 0.0000759 | 5.00E-06 |
| robust | PD_HY3 | eQTLGen     | ENSG00000238164 |          | 3780 | 1.29E-18  | 1.51E-16  | 0.0085203 | 0.9914046 | 0.0000752 | 0.9914797 | 0.0000758 | 5.00E-06 |
| robust | PD_HY3 | psychencode | ENSG00000269896 |          | 1958 | 2.44E-31  | 2.76E-29  | 0.0087580 | 0.9911685 | 0.0000734 | 0.9912420 | 0.0000741 | 5.00E-06 |
| robust | PD_HY3 | eQTLGen     | ENSG00000269896 |          | 3735 | 9.82E-101 | 1.14E-98  | 0.0085261 | 0.9914019 | 0.0000720 | 0.9914739 | 0.0000726 | 5.00E-06 |
| robust | PD_HY3 | eQTLGen     | ENSG00000116151 | MORN1    | 3746 | 5.20E-69  | 6.05E-67  | 0.0085277 | 0.9914005 | 0.0000717 | 0.9914723 | 0.0000723 | 5.00E-06 |
| robust | PD_HY3 | eQTLGen     | ENSG00000157873 | TNFRSF14 | 3769 | 5.38E-306 | 6.26E-304 | 0.0085150 | 0.9914135 | 0.0000715 | 0.9914850 | 0.0000721 | 5.00E-06 |

**Supplementary Table 4. Results for PD risk SNPs from Nalls 2019**

| nearest gene        | rsID        | chr | bp        | effect allele | other allele | effect allele freq | mortality |          | HY3    |       |
|---------------------|-------------|-----|-----------|---------------|--------------|--------------------|-----------|----------|--------|-------|
|                     |             |     |           |               |              |                    | beta      | p        | beta   | p     |
| <i>PMVK</i>         | rs114138760 | 1   | 154898185 | C             | G            | 0.014              | 0.094     | 0.618    | 0.180  | 0.455 |
| <i>KRTCAP2</i>      | rs35749011  | 1   | 155135036 | A             | G            | 0.028              | 0.395     | 3.59E-04 | 0.120  | 0.459 |
| <i>FCGR2A</i>       | rs6658353   | 1   | 161469054 | C             | G            | 0.534              | 0.034     | 0.330    | -0.036 | 0.495 |
| <i>VAMP4</i>        | rs11578699  | 1   | 171719769 | T             | C            | 0.192              | -0.051    | 0.255    | 0.087  | 0.185 |
| <i>NUCKS1</i>       | rs823118    | 1   | 205723572 | T             | C            | 0.558              | -0.019    | 0.585    | 0.035  | 0.523 |
| <i>RAB29</i>        | rs11557080  | 1   | 205737739 | A             | G            | 0.129              | -0.094    | 0.076    | 0.175  | 0.017 |
| <i>ITPKB</i>        | rs4653767   | 1   | 226916078 | T             | C            | 0.733              | -0.025    | 0.536    | 0.044  | 0.468 |
| <i>SIPA1L2</i>      | rs10797576  | 1   | 232664611 | T             | C            | 0.138              | 0.022     | 0.665    | -0.029 | 0.713 |
| <i>KCNS3</i>        | rs76116224  | 2   | 18147848  | A             | T            | 0.908              | -0.007    | 0.906    | -0.048 | 0.596 |
| <i>KCNIP3</i>       | rs2042477   | 2   | 96000943  | A             | T            | 0.245              | 0.013     | 0.742    | -0.042 | 0.499 |
| <i>MAP4K4</i>       | rs11683001  | 2   | 102396963 | A             | T            | 0.343              | -0.058    | 0.119    | 0.015  | 0.785 |
| <i>TMEM163</i>      | rs57891859  | 2   | 135464616 | A             | G            | 0.757              | 0.019     | 0.660    | -0.127 | 0.037 |
| <i>STK39</i>        | rs1474055   | 2   | 169110394 | T             | C            | 0.142              | -0.030    | 0.536    | 0.040  | 0.586 |
| <i>SATB1</i>        | rs73038319  | 3   | 18361759  | A             | C            | 0.955              | -0.141    | 0.090    | 0.060  | 0.666 |
| <i>LINC00693</i>    | rs6808178   | 3   | 28705690  | T             | C            | 0.404              | -0.064    | 0.080    | -0.069 | 0.209 |
| <i>IP6K2</i>        | rs12497850  | 3   | 48748989  | T             | G            | 0.650              | -0.023    | 0.535    | 0.014  | 0.803 |
| <i>KPNA1</i>        | rs55961674  | 3   | 122196892 | T             | C            | 0.155              | -0.002    | 0.965    | 0.095  | 0.174 |
| <i>MED12L</i>       | rs11707416  | 3   | 151108965 | A             | T            | 0.368              | -0.051    | 0.157    | 0.030  | 0.588 |
| <i>SPTSSB</i>       | rs1450522   | 3   | 161077630 | A             | G            | 0.679              | 0.014     | 0.699    | 0.047  | 0.407 |
| <i>MCCC1</i>        | rs10513789  | 3   | 182760073 | T             | G            | 0.828              | 0.005     | 0.923    | -0.007 | 0.919 |
| <i>GAK</i>          | rs873786    | 4   | 925376    | T             | C            | 0.096              | -0.033    | 0.590    | 0.039  | 0.657 |
| <i>TMEM175</i>      | rs34311866  | 4   | 951947    | T             | C            | 0.796              | -0.105    | 0.014    | -0.049 | 0.440 |
| <i>BST1</i>         | rs4698412   | 4   | 15737348  | A             | G            | 0.570              | -0.018    | 0.615    | -0.087 | 0.102 |
| <i>LCORL</i>        | rs34025766  | 4   | 17968811  | A             | T            | 0.142              | 0.080     | 0.110    | 0.079  | 0.281 |
| <i>SCARB2</i>       | rs6825004   | 4   | 77110365  | C             | G            | 0.712              | 0.090     | 0.021    | 0.016  | 0.784 |
| <i>FAM47E</i>       | rs4101061   | 4   | 77147969  | A             | G            | 0.701              | -0.016    | 0.666    | -0.135 | 0.018 |
| <i>FAM47E-STBD1</i> | rs6854006   | 4   | 77198054  | T             | C            | 0.350              | -0.026    | 0.464    | 0.025  | 0.641 |
| <i>SNCA</i>         | rs356182    | 4   | 90626111  | A             | G            | 0.597              | 0.015     | 0.667    | -0.006 | 0.910 |
| <i>SNCA</i>         | rs5019538   | 4   | 90636630  | A             | G            | 0.671              | 0.024     | 0.511    | 0.014  | 0.807 |
| <i>CAMK2D</i>       | rs13117519  | 4   | 114369065 | T             | C            | 0.188              | 0.005     | 0.916    | -0.034 | 0.615 |
| <i>CLCN3</i>        | rs62333164  | 4   | 170583157 | A             | G            | 0.317              | 0.015     | 0.679    | -0.165 | 0.005 |
| <i>ELOVL7</i>       | rs1867598   | 5   | 60137959  | A             | G            | 0.903              | -0.071    | 0.230    | 0.085  | 0.385 |
| <i>PAM</i>          | rs26431     | 5   | 102365794 | C             | G            | 0.703              | -0.042    | 0.265    | 0.032  | 0.584 |



|                     |             |    |           |   |   |       |        |       |        |       |
|---------------------|-------------|----|-----------|---|---|-------|--------|-------|--------|-------|
| <i>C5orf24</i>      | rs11950533  | 5  | 134199105 | A | C | 0.099 | 0.088  | 0.132 | 0.062  | 0.477 |
| <i>LOC100131289</i> | rs4140646   | 6  | 27738801  | A | G | 0.252 | -0.080 | 0.113 | -0.076 | 0.325 |
| <i>TRIM40</i>       | rs9261484   | 6  | 30108683  | T | C | 0.254 | 0.058  | 0.222 | 0.029  | 0.698 |
| <i>HLA-DRB5</i>     | rs112485576 | 6  | 32578772  | A | C | 0.171 | 0.061  | 0.267 | -0.035 | 0.709 |
| <i>RIMS1</i>        | rs12528068  | 6  | 72487762  | T | C | 0.298 | 0.063  | 0.111 | 0.033  | 0.572 |
| <i>FYN</i>          | rs997368    | 6  | 112243291 | A | G | 0.822 | 0.001  | 0.986 | 0.055  | 0.449 |
| <i>RPS12</i>        | rs75859381  | 6  | 133210361 | T | C | 0.965 | -0.157 | 0.090 | -0.242 | 0.092 |
| <i>GPNMB</i>        | rs199351    | 7  | 23300049  | A | C | 0.617 | -0.024 | 0.501 | 0.017  | 0.752 |
| <i>GS1-124K5.11</i> | rs76949143  | 7  | 66009851  | A | T | 0.054 | -0.080 | 0.330 | 0.040  | 0.751 |
| <i>CTSB</i>         | rs1293298   | 8  | 11712443  | A | C | 0.754 | -0.002 | 0.968 | 0.003  | 0.965 |
| <i>FGF20</i>        | rs620513    | 8  | 16697593  | T | G | 0.261 | 0.018  | 0.638 | 0.091  | 0.127 |
| <i>BIN3</i>         | rs2280104   | 8  | 22525980  | T | C | 0.368 | -0.018 | 0.622 | -0.039 | 0.475 |
| <i>FAM49B</i>       | rs2086641   | 8  | 130901909 | T | C | 0.731 | -0.022 | 0.571 | 0.074  | 0.220 |
| <i>SH3GL2</i>       | rs13294100  | 9  | 17579690  | T | G | 0.338 | 0.023  | 0.538 | -0.024 | 0.673 |
| <i>SH3GL2</i>       | rs10756907  | 9  | 17727065  | A | G | 0.755 | -0.016 | 0.701 | -0.010 | 0.872 |
| <i>UBAP2</i>        | rs6476434   | 9  | 34046391  | T | C | 0.729 | -0.005 | 0.891 | 0.037  | 0.536 |
| <i>ITGA8</i>        | rs896435    | 10 | 15557406  | T | C | 0.691 | -0.023 | 0.538 | 0.035  | 0.555 |
| <i>GBF1</i>         | rs10748818  | 10 | 104015279 | A | G | 0.839 | -0.014 | 0.772 | -0.016 | 0.826 |
| <i>BAG3</i>         | rs72840788  | 10 | 121415685 | A | G | 0.228 | -0.068 | 0.103 | -0.052 | 0.419 |
| <i>INPP5F</i>       | rs117896735 | 10 | 121536327 | A | G | 0.028 | 0.230  | 0.030 | 0.058  | 0.725 |
| <i>RNF141</i>       | rs7938782   | 11 | 10558777  | A | G | 0.895 | 0.041  | 0.474 | 0.045  | 0.609 |
| <i>DLG2</i>         | rs12283611  | 11 | 83487277  | A | C | 0.386 | 0.062  | 0.081 | 0.025  | 0.638 |
| <i>IGSF9B</i>       | rs3802920   | 11 | 133787001 | T | G | 0.203 | -0.016 | 0.721 | 0.106  | 0.092 |
| <i>LRRK2</i>        | rs76904798  | 12 | 40614434  | T | C | 0.158 | -0.105 | 0.032 | -0.051 | 0.483 |
| <i>SCAF11</i>       | rs7134559   | 12 | 46419086  | T | C | 0.378 | 0.065  | 0.073 | 0.057  | 0.294 |
| <i>HIP1R</i>        | rs10847864  | 12 | 123326598 | T | G | 0.378 | -0.026 | 0.472 | -0.034 | 0.574 |
| <i>FBRSL1</i>       | rs11610045  | 12 | 133063768 | A | G | 0.513 | -0.007 | 0.839 | 0.013  | 0.810 |
| <i>CAB39L</i>       | rs9568188   | 13 | 49927732  | T | C | 0.727 | 0.051  | 0.187 | 0.036  | 0.547 |
| <i>MBNL2</i>        | rs4771268   | 13 | 97865021  | T | C | 0.236 | 0.067  | 0.098 | -0.027 | 0.672 |
| <i>MIPOL1</i>       | rs12147950  | 14 | 37989270  | T | C | 0.418 | 0.054  | 0.129 | -0.115 | 0.037 |
| <i>GCH1</i>         | rs11158026  | 14 | 55348869  | T | C | 0.303 | -0.043 | 0.255 | 0.036  | 0.522 |
| <i>RPS6KL1</i>      | rs3742785   | 14 | 75373034  | A | C | 0.781 | 0.052  | 0.231 | 0.045  | 0.491 |
| <i>GALC</i>         | rs979812    | 14 | 88464264  | T | G | 0.440 | 0.003  | 0.924 | -0.002 | 0.977 |
| <i>VPS13C</i>       | rs2251086   | 15 | 61997385  | T | C | 0.130 | 0.106  | 0.037 | 0.040  | 0.619 |
| <i>SYT17</i>        | rs6497339   | 16 | 19277493  | A | T | 0.462 | -0.026 | 0.501 | -0.004 | 0.941 |
| <i>CD19</i>         | rs2904880   | 16 | 28944396  | C | G | 0.319 | 0.032  | 0.394 | 0.020  | 0.732 |
| <i>SETD1A</i>       | rs11150601  | 16 | 30977799  | A | G | 0.647 | 0.049  | 0.179 | -0.027 | 0.622 |
| <i>NOD2</i>         | rs6500328   | 16 | 50736656  | A | G | 0.610 | -0.003 | 0.938 | 0.045  | 0.406 |
| <i>CASC16</i>       | rs3104783   | 16 | 52636242  | A | C | 0.417 | -0.058 | 0.105 | -0.046 | 0.389 |
| <i>CHD9</i>         | rs10221156  | 16 | 52969426  | A | G | 0.087 | 0.064  | 0.305 | -0.268 | 0.010 |
| <i>CHRNA1</i>       | rs12600861  | 17 | 7355621   | A | C | 0.622 | 0.029  | 0.429 | 0.049  | 0.378 |
| <i>RETREG3</i>      | rs12951632  | 17 | 40741013  | T | C | 0.735 | 0.022  | 0.576 | -0.087 | 0.132 |
| <i>UBTF</i>         | rs2269906   | 17 | 42294337  | A | C | 0.675 | -0.002 | 0.959 | -0.039 | 0.483 |
| <i>FAM171A2</i>     | rs850738    | 17 | 42434630  | A | G | 0.577 | -0.022 | 0.539 | -0.020 | 0.711 |

|               |             |    |          |   |   |       |        |       |        |       |
|---------------|-------------|----|----------|---|---|-------|--------|-------|--------|-------|
| <i>CRHR1</i>  | rs62053943  | 17 | 43744203 | T | C | 0.131 | -0.027 | 0.587 | -0.019 | 0.813 |
| <i>CRHR1</i>  | rs117615688 | 17 | 43798308 | A | G | 0.058 | 0.059  | 0.577 | -0.022 | 0.860 |
| <i>WNT3</i>   | rs11658976  | 17 | 44866805 | A | G | 0.587 | 0.005  | 0.900 | -0.032 | 0.547 |
| <i>BRIP1</i>  | rs61169879  | 17 | 59917366 | T | C | 0.161 | -0.039 | 0.405 | 0.080  | 0.246 |
| <i>DNAH17</i> | rs666463    | 17 | 76425480 | A | T | 0.832 | 0.004  | 0.933 | 0.052  | 0.459 |
| <i>ASXL3</i>  | rs1941685   | 18 | 31304318 | T | G | 0.504 | -0.039 | 0.259 | -0.099 | 0.060 |
| <i>RIT2</i>   | rs12456492  | 18 | 40673380 | A | G | 0.662 | 0.036  | 0.331 | -0.042 | 0.453 |
| <i>MEX3C</i>  | rs8087969   | 18 | 48683589 | T | G | 0.525 | -0.013 | 0.705 | 0.053  | 0.316 |
| <i>SPPL2B</i> | rs55818311  | 19 | 2341047  | T | C | 0.665 | 0.023  | 0.532 | 0.048  | 0.385 |
| <i>CRLS1</i>  | rs77351827  | 20 | 6006041  | T | C | 0.125 | -0.099 | 0.081 | -0.042 | 0.608 |
| <i>DYRK1A</i> | rs2248244   | 21 | 38852361 | A | G | 0.289 | -0.018 | 0.640 | 0.038  | 0.510 |

**Supplementary Table 5.** Results for candidate variant analysis.

| Previous study                       | nearest gene   | rsID        | chr | bp        | effect allele | other allele | effect allele freq | mortality |         | HY3    |         |
|--------------------------------------|----------------|-------------|-----|-----------|---------------|--------------|--------------------|-----------|---------|--------|---------|
|                                      |                |             |     |           |               |              |                    | beta      | p-value | beta   | p-value |
| Iwaki2019 - PD progression to HY3    | <i>SLC44A1</i> | rs382940    | 9   | 108058562 | A             | T            | 0.074              | 0.098     | 0.141   | -0.009 | 0.925   |
| Liu2021 - PD progression to dementia | <i>RIMS2</i>   | rs182987047 | 8   | 105249272 | T             | A            | 0.018              | -0.108    | 0.485   | 0.016  | 0.943   |
| Liu2021 - PD progression to dementia | <i>TMEM108</i> | rs138073281 | 3   | 132985956 | C             | A            | 0.018              | 0.085     | 0.591   | 0.084  | 0.687   |
| Liu2021 - PD progression to dementia | <i>WWOX</i>    | rs8050111   | 16  | 78281160  | G             | A            | 0.065              | -0.017    | 0.814   | 0.005  | 0.963   |
| PD cognition and dementia, APOE ε2   | <i>APOE</i>    | rs7412      | 19  | 45412079  | T             | C            | 0.080              | -0.091    | 0.180   | 0.102  | 0.280   |
| PD cognition and dementia, MAPT H1   | <i>MAPT</i>    | rs8070723   | 17  | 44081064  | G             | A            | 0.183              | -0.010    | 0.828   | -0.037 | 0.586   |
| Jabbari2021 - PSP mortality          | <i>SLC2A13</i> | rs2242367   | 12  | 40413698  | A             | G            | 0.265              | 0.118     | 0.002   | -0.011 | 0.861   |

HY3 = Hoehn and Yahr stage 3 or greater; PD = Parkinson's disease; PSP = Progressive Supranuclear Palsy

**Supplementary Table 6.** Top mortality SNPs and their association with progression to H&Y3

| chr | bp        | rsID        | effect allele | non-effect allele | effect allele freq | nearest gene     | mortality |       |          | HY3     |          |         |
|-----|-----------|-------------|---------------|-------------------|--------------------|------------------|-----------|-------|----------|---------|----------|---------|
|     |           |             |               |                   |                    |                  | beta      | SE    | p-value  | beta    | SE       | p-value |
| 19  | 45411941  | rs429358    | C             | T                 | 0.160              | <i>APOE</i>      | 0.295     | 0.046 | 1.35E-10 | 0.156   | 0.075    | 0.037   |
| 7   | 139637422 | rs4726467   | T             | C                 | 0.021              | <i>TBXAS1</i>    | 0.713     | 0.116 | 7.71E-10 | -0.248  | 0.266    | 0.352   |
| 12  | 33635494  | rs10437796  | A             | C                 | 0.098              | <i>SYT10</i>     | 0.304     | 0.056 | 5.31E-08 | 0.022   | 0.090    | 0.807   |
| 9   | 17616880  | rs3808753   | G             | A                 | 0.035              | <i>SH3GL2</i>    | 0.448     | 0.088 | 3.34E-07 | 0.156   | 0.166    | 0.347   |
| 3   | 113979619 | rs142285045 | A             | C                 | 0.013              | <i>ZNF80</i>     | 0.836     | 0.165 | 3.80E-07 | 0.012   | 0.275    | 0.966   |
| 18  | 33965217  | rs76125680  | C             | G                 | 0.012              | <i>FHOD3</i>     | 0.874     | 0.174 | 5.32E-07 | -15.752 | 2601.490 | 0.995*  |
| 15  | 34896795  | rs35294489  | G             | A                 | 0.014              | <i>GOLGA8B</i>   | 0.757     | 0.152 | 6.07E-07 | -0.110  | 0.243    | 0.649   |
| 5   | 55533638  | rs28811891  | T             | C                 | 0.026              | <i>ANKRD55</i>   | 0.544     | 0.109 | 6.21E-07 | 0.181   | 0.162    | 0.263   |
| 21  | 31807104  | rs145506557 | C             | A                 | 0.016              | <i>KRTAP13-4</i> | 0.896     | 0.180 | 6.59E-07 | 0.561   | 0.439    | 0.202*  |
| 10  | 98786658  | rs17112311  | A             | G                 | 0.049              | <i>C10orf12</i>  | 0.364     | 0.074 | 8.07E-07 | 0.024   | 0.124    | 0.844   |

Genome coordinates are in build hg19/GRCh37.

\* These SNPs were genotyped in < 1000 individuals across all cohorts in the H&Y3 GWAS. All other SNPs were genotyped in at least 1000 individuals.

Abbreviations: BP = base pair, chr = chromosome, CI = Confidence Interval, freq = frequency, GCTA-COJO = Genome-wide Complex Trait Analysis conditional and joint analysis, SE = Standard Error, SNP = Single Nucleotide Polymorphism

**Supplementary Table 7.** Mortality GWAS - Cox proportional hazards assumption p-value for each of the top 10 SNPs for each cohort included in the meta-analysis

| chr | bp        | rsid        | Tracking Parkinson's | Oxford Discovery | QSBB  | UKB incident | UKB prevalent | Calypso | CamPaIGN | DIGPD | Trondheim | Oslo  |
|-----|-----------|-------------|----------------------|------------------|-------|--------------|---------------|---------|----------|-------|-----------|-------|
| 19  | 45411941  | rs429358    | 0.726                | 0.437            | 0.074 | 0.710        | 0.657         | 0.250   | 0.522    | 0.237 | 0.009     | 0.720 |
| 7   | 139637422 | rs4726467   | 0.587                | 0.703            | 0.941 | 0.083        | 0.042         | 0.166   | 0.115    | 0.362 | NA        | 0.974 |
| 12  | 33635494  | rs10437796  | 0.549                | 0.005            | 0.193 | 0.800        | 0.912         | 0.734   | 0.733    | 0.799 | 0.621     | 0.475 |
| 9   | 17616880  | rs3808753   | 0.138                | 0.689            | 0.519 | 0.875        | 0.393         | 0.071   | 0.459    | 0.543 | 0.698     | 0.992 |
| 3   | 113979619 | rs142285045 | 0.889                | 0.082            | NA    | 0.637        | 0.716         | 0.320   | NA       | 0.380 | NA        | NA    |
| 18  | 33965217  | rs76125680  | NA                   | NA               | NA    | 0.031        | 0.027         | 0.541   | NA       | 0.143 | 0.354     | NA    |
| 15  | 34896795  | rs35294489  | 0.543                | 0.242            | NA    | 0.327        | 0.304         | NA      | 1.000    | NA    | NA        | 0.644 |
| 5   | 55533638  | rs28811891  | 0.531                | 0.001            | NA    | 0.401        | 0.385         | 0.076   | 0.956    | 0.216 | 0.586     | 0.095 |
| 21  | 31807104  | rs145506557 | NA                   | NA               | NA    | 0.078        | 0.568         | NA      | NA       | NA    | NA        | NA    |
| 10  | 98786658  | rs17112311  | 0.449                | 0.111            | 0.646 | 0.079        | 0.122         | 0.209   | 0.045    | 0.299 | 0.007     | 0.311 |

P-values for the test of the proportional hazards assumption generated using the `cox.zph` function in R. P-values less than 0.05 indicate the proportional hazards assumption was not met. We did not filter out SNPs or cohorts based on the proportional hazards assumption p-value, as the assumption was met in the majority of cohorts for the top SNPs.

**Supplementary Table 8.** H&Y3+ GWAS - Cox proportional hazards assumption p-value for each of the top 11 SNPs for each cohort included in the meta-analysis.

| chr | bp        | rsid        | Tracking<br>Parkinson's | Oxford<br>Discovery | PPMI  | DIGPD | Oslo  |
|-----|-----------|-------------|-------------------------|---------------------|-------|-------|-------|
| 1   | 2315032   | rs115217673 | 0.756                   | 0.314               | 0.171 | NA    | 0.245 |
| 7   | 97470925  | rs145274312 | NA                      | 0.787               | NA    | 0.072 | NA    |
| 4   | 120566153 | rs113120976 | NA                      | 0.646               | NA    | 0.007 | NA    |
| 2   | 61742356  | rs141421624 | 0.688                   | 0.263               | 0.171 | 0.435 | 0.335 |
| 1   | 231267735 | rs74796254  | 0.614                   | 0.532               | 0.239 | 0.809 | 0.753 |
| 1   | 247425485 | rs72771919  | 0.450                   | 0.181               | 0.867 | 0.063 | 0.853 |
| 4   | 186697549 | rs75614365  | 0.484                   | 0.974               | 0.867 | 0.918 | 0.508 |
| 1   | 43105085  | rs75140767  | 0.473                   | 0.079               | 1.000 | 0.744 | 0.729 |
| 2   | 131557187 | rs7566590   | 0.357                   | 0.620               | 0.669 | 0.996 | 0.288 |
| 6   | 11284774  | rs148949229 | NA                      | 0.744               | 0.916 | 1.000 | 0.004 |
| 15  | 82198898  | rs58698247  | 0.700                   | 0.031               | 0.521 | 0.140 | 0.010 |

P-values for the test of the proportional hazards assumption generated using the `cox.zph` function in R. P-values less than 0.05 indicate the proportional hazards assumption was not met. We did not filter out SNPs or cohorts based on the proportional hazards assumption p-value, as the assumption was met in the majority of cohorts for the top SNPs

**Supplementary Table 9.** PAINTOR results for mortality GWAS, variants with posterior probability > 0.9.

| <b>chr</b> | <b>bp</b> | <b>A1 (effect)</b> | <b>A0 (noneffect)</b> | <b>ZSCORE</b> | <b>posterior_probability</b> |
|------------|-----------|--------------------|-----------------------|---------------|------------------------------|
| 3          | 113979619 | A                  | C                     | -5.078663122  | 0.999                        |
| 5          | 55533638  | T                  | C                     | -4.984725     | 0.999                        |
| 21         | 31807104  | A                  | C                     | -4.9729549    | 0.999                        |

**Supplementary Table 10.** PAINTOR results for H&Y3+ GWAS, variants with posterior probability > 0.9.

| <b>chr</b> | <b>bp</b> | <b>A1 (effect)</b> | <b>A0 (noneffect)</b> | <b>ZSCORE</b> | <b>posterior_probability</b> |
|------------|-----------|--------------------|-----------------------|---------------|------------------------------|
| 1          | 43105085  | A                  | G                     | -5.1079342    | 0.997                        |
| 1          | 231267735 | T                  | C                     | -5.2989038    | 0.999                        |
| 1          | 247425485 | A                  | G                     | -5.2598155    | 1.000                        |
| 2          | 61742356  | A                  | G                     | -5.5367704    | 1.000                        |
| 4          | 120566153 | T                  | C                     | -5.7921042    | 1.000                        |



**Supplementary Table 11.** SlopeHunter top SNPs by adjusted pvalue.

|             |     |           |                |                  | Association with PD risk |       |       | Association with PD mortality |       |          |                             |       |          |
|-------------|-----|-----------|----------------|------------------|--------------------------|-------|-------|-------------------------------|-------|----------|-----------------------------|-------|----------|
|             |     |           |                |                  |                          |       |       | Unadjusted                    |       |          | Adjusted using Slope-Hunter |       |          |
| SNP         | CHR | BP        | nearest_gene   | Distance to gene | beta                     | SE    | pval  | beta                          | SE    | pval     | beta                        | SE    | pval     |
| 19:45388130 | 19  | 45388130  | <i>TOMM40</i>  | 6,347            | -0.034                   | 0.025 | 0.168 | 0.232                         | 0.047 | 9.54E-07 | 0.243                       | 0.048 | 4.91E-07 |
| 13:31540660 | 13  | 31540660  | <i>TEX26</i>   | 0                | -0.128                   | 0.088 | 0.145 | 0.579                         | 0.124 | 3.20E-06 | 0.619                       | 0.129 | 1.53E-06 |
| 6:96387321  | 6   | 96387321  | <i>FUT9</i>    | 76,524           | -0.104                   | 0.135 | 0.438 | 1.061                         | 0.224 | 2.25E-06 | 1.094                       | 0.229 | 1.84E-06 |
| 12:33573752 | 12  | 33573752  | <i>SYT10</i>   | 0                | 0.020                    | 0.031 | 0.506 | 0.275                         | 0.056 | 6.97E-07 | 0.269                       | 0.057 | 1.97E-06 |
| 5:55533638  | 5   | 55533638  | <i>ANKRD55</i> | 4,452            | 0.058                    | 0.070 | 0.410 | 0.544                         | 0.109 | 6.16E-07 | 0.525                       | 0.112 | 2.68E-06 |
| 6:17028264  | 6   | 17028264  | <i>STMND1</i>  | 74,225           | -0.056                   | 0.098 | 0.570 | 0.649                         | 0.138 | 2.65E-06 | 0.666                       | 0.142 | 2.85E-06 |
| 1:74507315  | 1   | 74507315  | <i>LRRIQ3</i>  | 0                | -0.047                   | 0.043 | 0.281 | 0.382                         | 0.083 | 4.60E-06 | 0.397                       | 0.085 | 2.93E-06 |
| 13:72433394 | 13  | 72433394  | <i>DACH1</i>   | 0                | 0.016                    | 0.090 | 0.863 | 0.567                         | 0.120 | 2.40E-06 | 0.562                       | 0.124 | 6.00E-06 |
| 2:166279387 | 2   | 166279387 | <i>CSRNP3</i>  | 46,770           | 0.162                    | 0.089 | 0.067 | -0.607                        | 0.141 | 1.68E-05 | -0.659                      | 0.146 | 6.19E-06 |
| 11:77522336 | 11  | 77522336  | <i>AAMDC</i>   | 9,811            | 0.081                    | 0.088 | 0.353 | -0.593                        | 0.135 | 1.03E-05 | -0.619                      | 0.138 | 7.47E-06 |

**Supplementary Table 12.** Top mortality SNPs without adjusting for age at onset, and their direct association with age at onset in a linear model

| chr | bp        | rsID        | effect allele | non-effect allele | Association with mortality without adjusting for age at onset |       |          | Association with age at onset |       |        |
|-----|-----------|-------------|---------------|-------------------|---------------------------------------------------------------|-------|----------|-------------------------------|-------|--------|
|     |           |             |               |                   | beta                                                          | SE    | pvalue   | beta                          | SE    | pvalue |
| 19  | 45411941  | rs429358    | C             | T                 | 0.239                                                         | 0.044 | 4.80E-08 | 0.054                         | 0.206 | 0.794  |
| 7   | 139637422 | rs4726467   | T             | C                 | 0.590                                                         | 0.109 | 5.62E-08 | -0.961                        | 0.541 | 0.076  |
| 12  | 33635494  | rs10437796  | A             | C                 | 0.227                                                         | 0.054 | 2.17E-05 | -0.316                        | 0.248 | 0.202  |
| 9   | 17616880  | rs3808753   | G             | A                 | 0.343                                                         | 0.084 | 4.68E-05 | -0.148                        | 0.429 | 0.730  |
| 3   | 113979619 | rs142285045 | A             | C                 | 0.681                                                         | 0.157 | 1.53E-05 | -0.186                        | 0.725 | 0.797  |
| 18  | 33965217  | rs76125680  | C             | G                 | 0.871                                                         | 0.170 | 2.86E-07 | 0.615                         | 0.881 | 0.485  |
| 15  | 34896795  | rs35294489  | G             | A                 | 0.697                                                         | 0.151 | 4.06E-06 | -0.136                        | 0.657 | 0.836  |
| 5   | 55533638  | rs28811891  | T             | C                 | 0.328                                                         | 0.104 | 0.002    | -0.055                        | 0.472 | 0.907  |
| 21  | 31807104  | rs145506557 | C             | A                 | 0.775                                                         | 0.173 | 7.32E-06 | 0.389                         | 0.767 | 0.612  |
| 10  | 98786658  | rs17112311  | A             | G                 | 0.250                                                         | 0.071 | 3.96E-04 | -0.096                        | 0.347 | 0.782  |

**Supplementary Table 13.** Top 4 SNPs from the H&Y3+ GWAS and their association with progression to H&Y4+ and H&Y5

| chr | bp        | rsID        | effect allele | non-effect allele | effect allele freq | nearest gene | H&Y4+ |       |         | H&Y5    |           |         |
|-----|-----------|-------------|---------------|-------------------|--------------------|--------------|-------|-------|---------|---------|-----------|---------|
|     |           |             |               |                   |                    |              | beta  | SE    | p-value | beta    | SE        | p-value |
| 1   | 2315032   | rs115217673 | A             | G                 | 0.016              | <i>MORN1</i> | 0.291 | 0.387 | 0.453   | 0.390   | 1.025     | 0.704   |
| 7   | 97470925  | rs145274312 | A             | G                 | 0.011              | <i>ASNS</i>  | 1.883 | 1.129 | 0.096   | 5.636   | 0.006     | 2.045   |
| 4   | 120566153 | rs113120976 | T             | C                 | 0.013              | <i>PDE5A</i> | 0.201 | 1.025 | 0.845   | -17.283 | 10768.670 | 0.999   |
| 2   | 61742356  | rs141421624 | G             | A                 | 0.017              | <i>XPO1</i>  | 0.680 | 0.357 | 0.057   | 0.794   | 1.079     | 0.462   |

## SUPPLEMENTARY DISCUSSION

### Potential causal genes

Here we briefly discuss the loci nominated by our GWASs. For ease, these have been named after the physically closest genes but we discuss other possible causal genes at the locus.

*TBXAS1*: *TBXAS1* encodes Thromboxane A Synthase 1, which catalyses the conversion of prostaglandin H<sub>2</sub> to thromboxane A<sub>2</sub>, which acts as a platelet aggregator and vasoconstrictor. Variants in *TBXAS1* have previously been associated with coronary artery disease in a number of GWASs.<sup>5-8</sup> We showed that a locus in *TBXAS1* was associated with all-cause mortality in PD cohorts. Thus, it is possible that the association between *TBXAS1* and PD mortality may be due to increased coronary artery disease or other non-PD causes.

However, there are a few important factors to consider. Firstly, the locus we identified for mortality in PD cohorts is different from those associated with coronary artery disease, so it may be that different SNPs within this gene have different effects. Secondly, our search of the most recent longevity GWASs<sup>9</sup> suggests that variation at *TBXAS1* does not influence mortality and longevity in the general population. Thirdly, it is also possible that patients with PD are more susceptible to adverse effects of a SNP than healthy controls, so PD or its treatment increases vulnerability to the SNP effect on coronary artery disease but the cause of death is not able to be classified as 'PD-related'. This has also been seen in previous non-genetic studies of PD mortality.<sup>10</sup> Thus future analyses including cause of death are needed to clarify the mechanism through which *TBXAS1* variants influence mortality in PD patients.

*SYT10*: We also found evidence that a locus near *SYT10* (synaptotagmin 10) in Chromosome 12 was associated with mortality. This protein is a calcium sensor involved in regulation of calcium-dependent exocytosis, specifically related to peptidergic vesicles.<sup>11</sup> Deletion of *Syt10* impairs IGF-1 secretion in olfactory bulb neurons<sup>11</sup>, and IGF-1 deficiency has been suggested to play a role in the development of PD<sup>12</sup> and deficits in dopamine neuron firing accompanied by motor deficits<sup>13</sup>. This locus was also nominally associated with longevity in the general population (beta=-0.008, p=0.003)<sup>9</sup>.

*MORN1*: *MORN1* encodes the Membrane Occupation and Recognition (MORN) repeat containing 1 protein. The function of this protein is not very well understood or studied in humans.

**ASNS:** This gene encodes Asparagine synthetase which converts aspartate and glutamine to asparagine and glutamate<sup>14</sup>. Glutamate is an important neurotransmitter and extracellular glutamate can be neurotoxic through activation of N-methyl-D-aspartate (NMDA) receptors.<sup>15</sup> This excitotoxicity may contribute to neuronal death in neurodegenerative diseases including PD and AD.<sup>15,16</sup> It has also been shown that asparaginase, a cancer therapy which breaks down asparagine, has a neuroprotective effect in a SNCA A53T cell model of PD by depleting glutamine and activating the degradation of  $\alpha$ -synuclein through autophagy and improved mitochondrial function.<sup>17</sup>

We also note that for two of the loci (near *PDE5A* and *ASNS*), there were no nearby SNPs with similar effect sizes providing the supportive GWAS 'peak', however this is likely due to a lack of SNPs in linkage disequilibrium with the lead SNP as shown in the LocusZoom plots (Supplementary Figures 8-9) and LDproxy (<https://ldlink.nih.gov>). The summary statistics from this study are publicly available and replication of these hits is needed.

**PDE5A:** Phosphodiesterase 5A (PDE5A) is a member of the cyclic nucleotide phosphodiesterase (PDE) family which are responsible for breaking down the cyclic nucleotides: cyclic adenosine monophosphate (cAMP) and cyclic guanosine monophosphate (cGMP). These intracellular second messengers are important in aging, AD, Huntington's disease and PD.<sup>18</sup> PDE5 specifically breaks down cGMP. Studies have shown that PDE inhibitors like zaprinast restored long-term depression (a form of synaptic plasticity) in mice overexpressing SNCA A53T<sup>19</sup>, and reduced the severity of dyskinesias and increased cAMP and cGMP levels in a hemiparkinsonian rat model.<sup>20</sup> However PDE5 is not very highly expressed in the striatum compared to other PDEs and also relative to other tissues, and other PDEs may be important in PD.<sup>18,21</sup>

The top SNP in this locus was also a significant eQTL for *USP53* in blood. *USP53* has been linked to hepatocellular carcinoma and oesophageal cancer, where its downregulation was found in tumour tissues from patients.<sup>22-24</sup> Overexpression of *USP53* promoted tumour cell death and reduced tumour growth, suggesting an anti-tumour role in certain cancers.<sup>23,24</sup>

**XPO1:** This locus spanned 4 genes including *XPO1*, *USP34*, *C2orf74* and *KIAA1841*, with the lead SNP influencing expression of *KIAA1841* and *AHSA2* in blood and *C2orf74* in brain cortex. *XPO1* (Exportin 1) transports tumour suppressors, anti-inflammatory factors and growth regulating proteins from the nucleus to the cytoplasm.<sup>25,26</sup> In a PD mouse model, inhibition of *XPO1* with eltanexor prevented dopaminergic neuron loss and microglial activation, and rescued locomotor incoordination.<sup>27</sup>

*USP34*: USP34 is a ubiquitin-specific protease that modulates the Wnt signalling pathway by removing ubiquitin conjugates from axin and controlling the level of axin.<sup>28</sup>

C2orf74, chromosome 2 open reading frame 74, has not been extensively studied. It may be involved in autoimmune disorders, where differences in gene expression have been found in celiac disease,<sup>29</sup> and GWAS hits within C2orf74 for celiac disease, ulcerative colitis, and Crohn's disease may alter gene expression in thymic tissue.<sup>30</sup> However, so far it has not been studied in PD.

## SUPPLEMENTARY NOTES

### Software

METAL (version 2011-03-25): <http://www.sph.umich.edu/csg/abecasis/metal/> (RRID:SCR\_002013).

R (v3.6) <https://cran.r-project.org/>. R Project for Statistical Computing (RRID:SCR\_001905).

PLINK (v1.9): <https://www.cog-genomics.org/plink/> PLINK (RRID:SCR\_001757).

LocusZoom: <http://locuszoom.org/> (RRID:SCR\_009257)

liftOver: <https://genome.sph.umich.edu/wiki/LiftOver> (RRID:SCR\_018160).

GCTA-COJO (v1.94.1): <https://yanglab.westlake.edu.cn/software/gcta/#COJO>

MAGMA: <https://snp-magma.sourceforge.net> (RRID:SCR\_005757)

PAINTOR (v3.1): <https://bogdan.dgsom.ucla.edu/pages/paintor/>

FUMA (v1.5.1): <https://fuma.ctglab.nl/> (RRID:SCR\_017521)

R packages for specific analyses:

- *survSNP*: <https://cran.r-project.org/web/packages/survSNP/index.html>
- *coloc* (v5.1): <https://cran.r-project.org/web/packages/coloc/>, <https://chr1swallace.github.io/coloc/index.html>
- *colochelpR*: <https://github.com/RHReynolds/colochelpR>
- *forestplot* (v3.3.1): <https://cran.r-project.org/web/packages/forestplot/>
- *survival* (RRID:SCR\_021137): <https://cran.r-project.org/web/packages/survival/index.html>
- *meta* (RRID:SCR\_019055): <https://cran.r-project.org/web/packages/meta/index.html>
- *hudson* (v1.0.0): <https://github.com/anastasia-lucas/hudson>

### Public databases

GWAS Catalogue: <https://www.ebi.ac.uk/gwas>

LDpair, LDproxy (version 5.6.2): <https://ldlink.nih.gov/>  
eQTLGen: <https://www.eqtlgen.org/>  
MetaBrain: <https://www.metabrain.nl/>  
GTEx eQTL Browser (RRID:SCR\_001618): <https://gtexportal.org/>  
PsychENCODE (RRID:SCR\_021760): <http://resource.psychencode.org/>  
Michigan Imputation Server (RRID:SCR\_017579):  
<https://imputationserver.readthedocs.io/en/latest/>  
HapMap 3 reference panel:  
<https://www.sanger.ac.uk/resources/downloads/human/hapmap3.html/>  
<https://ftp.ncbi.nlm.nih.gov/hapmap/>  
Iwaki 2019 Progression GWAS summary statistics:  
<https://pdgenetics.shinyapps.io/pdprogmetagwasbrowser/>  
Timmers 2020 longevity GWAS: [www.longevitygenomics.org/downloads](http://www.longevitygenomics.org/downloads)

## **DIGPD study group**

Steering committee: Jean-Christophe Corvol, MD (Pitié-Salpêtrière Hospital, Paris, principal investigator of DIGPD); Alexis Elbaz, MD (CESP, Villejuif, member of the steering committee and PI for statistical analyses), Marie Vidailhet, MD (Pitié-Salpêtrière Hospital, Paris, member of the steering committee), Alexis Brice, MD (Pitié-Salpêtrière Hospital, Paris, member of the steering committee and PI for genetic analysis) ; Statistical analyses: Fanny Artaud, PhD (CESP, Villejuif, statistician); Principal investigators for sites: Frédéric Bourdain, MD (CH Foch, Suresnes, PI for site), Jean-Philippe Brandel, MD (Fondation Rothschild, Paris, PI for site), Pascal Derkinderen, MD (CHU Nantes, PI for site), Franck Durif, MD (CHU Clermont-Ferrand, PI for site), Richard Levy, MD (CHU Saint-Antoine, Paris, PI for site), Fernando Pico, MD (CH Versailles, PI for site), Olivier Rascol, MD (CHU Toulouse, PI for site); Co-investigators: Cecilia Bonnet, MD (Pitié-Salpêtrière Hospital, Paris, site investigator), Christine Brefel-Courbon, MD (CHU Toulouse, site investigator), Florence Cormier-Dequaire, MD (Pitié-Salpêtrière Hospital, Paris, site investigator), Andreas Hartmann, MD (Pitié-Salpêtrière Hospital, Paris, site investigator), Stephan Klebe, MD (Pitié-Salpêtrière Hospital, Paris, site investigator), Julia Kraemmer, MD (Pitié-Salpêtrière Hospital, site investigator), Lucette Lacomblez (Pitié-Salpêtrière Hospital, Paris, site investigator), Graziella Mangone, MD (Pitié-Salpêtrière Hospital, Paris, site investigator), Ana-Raquel Marques, MD (CHU Clermont Ferrand, site investigator), Valérie Mesnage, MD (CHU Saint Antoine, Paris, site investigator), Julia Muellner (Pitié-Salpêtrière Hospital, Paris, site investigator), Fabienne Ory-Magne, MD (CHU Toulouse, site investigator), Hana You (Pitié-Salpêtrière Hospital, Paris, site investigator); Neuropsychologists: Eve Benchetrit, MS (Pitié-Salpêtrière Hospital, Paris, neuropsychologist), Julie Socha, MS (Pitié-Salpêtrière Hospital, Paris, neuropsychologist), Fanny Pineau, MS (Pitié-Salpêtrière Hospital, Paris,

neuropsychologist); Sponsor activities and clinical research assistants: Alain Mallet, PhD (Pitié-Salpêtrière Hospital, Paris, sponsor representative), Coralie Villeret (Hôpital Saint Louis, Paris, Project manager), Merry Mazmanian (Pitié-Salpêtrière Hospital, Paris, project manager), Hakima Manseur (Pitié-Salpêtrière Hospital, Paris, clinical research assistant), Mostafa Hajji (Pitié-Salpêtrière Hospital, Paris, data manager), Benjamin Le Toullec, MS (Pitié-Salpêtrière Hospital, Paris, clinical research assistant).

### **AMP PD acknowledgements**

Data used in the preparation of this article were obtained from the Accelerating Medicine Partnership® (AMP®) Parkinson's Disease (AMP PD) Knowledge Platform. For up-to-date information on the study, visit <https://www.amp-pd.org>.

The AMP® PD program is a public-private partnership managed by the Foundation for the National Institutes of Health and funded by the National Institute of Neurological Disorders and Stroke (NINDS) in partnership with the Aligning Science Across Parkinson's (ASAP) initiative; Celgene Corporation, a subsidiary of Bristol-Myers Squibb Company; GlaxoSmithKline plc (GSK); The Michael J. Fox Foundation for Parkinson's Research ; Pfizer Inc.; Sanofi US Services Inc.; and Verily Life Sciences.

ACCELERATING MEDICINES PARTNERSHIP and AMP are registered service marks of the U.S. Department of Health and Human Services.

### **AMP PD Cohort Acknowledgements**

Clinical data and biosamples used in preparation of this article were obtained from the (i) Michael J. Fox Foundation for Parkinson's Research (MJFF) and National Institutes of Neurological Disorders and Stroke (NINDS) BioFIND study, (ii) Harvard Biomarkers Study (HBS), (iii) National Institute on Aging (NIA) International Lewy Body Dementia Genetics Consortium Genome Sequencing in Lewy Body Dementia Case-control Cohort (LBD), (iv) MJFF LRRK2 Cohort Consortium (LCC), (v) NINDS Parkinson's Disease Biomarkers Program (PDBP), (vi) MJFF Parkinson's Progression Markers Initiative (PPMI), and (vii) NINDS Study of Isradipine as a Disease-modifying Agent in Subjects With Early Parkinson Disease, Phase 3 (STEADY-PD3) and (viii) the NINDS Study of Urate Elevation in Parkinson's Disease, Phase 3 (SURE-PD3).

BioFIND is sponsored by The Michael J. Fox Foundation for Parkinson's Research (MJFF) with support from the National Institute for Neurological Disorders and Stroke (NINDS). The BioFIND Investigators have not participated in reviewing the data analysis or content of the manuscript. For up-to-date information on the study, visit [michaeljfox.org/news/biofind](http://michaeljfox.org/news/biofind).

Genome sequence data for the Lewy body dementia case-control cohort were generated at the Intramural Research Program of the U.S. National Institutes of Health. The study



was supported in part by the National Institute on Aging (program #: 1ZIAAG000935) and the National Institute of Neurological Disorders and Stroke (program #: 1ZIANS003154).

The Harvard Biomarker Study (HBS) is a collaboration of HBS investigators [full list of HBS investigators found at <https://www.bwhparkinsoncenter.org/biobank/> and funded through philanthropy and NIH and Non-NIH funding sources. The HBS Investigators have not participated in reviewing the data analysis or content of the manuscript.

Data used in preparation of this article were obtained from The Michael J. Fox Foundation sponsored LRRK2 Cohort Consortium (LCC). The LCC Investigators have not participated in reviewing the data analysis or content of the manuscript. For up-to-date information on the study, visit <https://www.michaeljfox.org/biospecimens>.

PPMI is sponsored by The Michael J. Fox Foundation for Parkinson's Research and supported by a consortium of scientific partners: [list the full names of all of the PPMI funding partners found at <https://www.ppmi-info.org/about-ppmi/who-we-are/study-sponsors>]. The PPMI investigators have not participated in reviewing the data analysis or content of the manuscript. For up-to-date information on the study, visit [www.ppmi-info.org](http://www.ppmi-info.org).

The Parkinson's Disease Biomarker Program (PDBP) consortium is supported by the National Institute of Neurological Disorders and Stroke (NINDS) at the National Institutes of Health. A full list of PDBP investigators can be found at <https://pdbp.ninds.nih.gov/policy>. The PDBP investigators have not participated in reviewing the data analysis or content of the manuscript.

The Study of Isradipine as a Disease-modifying Agent in Subjects With Early Parkinson Disease, Phase 3 (STEADY-PD3) is funded by the National Institute of Neurological Disorders and Stroke (NINDS) at the National Institutes of Health with support from The Michael J. Fox Foundation and the Parkinson Study Group. For additional study information, visit <https://clinicaltrials.gov/ct2/show/study/NCT02168842>. The STEADY-PD3 investigators have not participated in reviewing the data analysis or content of the manuscript.

The Study of Urate Elevation in Parkinson's Disease, Phase 3 (SURE-PD3) is funded by the National Institute of Neurological Disorders and Stroke (NINDS) at the National Institutes of Health with support from The Michael J. Fox Foundation and the Parkinson Study Group. For additional study information, visit <https://clinicaltrials.gov/ct2/show/NCT02642393>. The SURE-PD3 investigators have not participated in reviewing the data analysis or content of the manuscript.

## SUPPLEMENTARY REFERENCES

1. Nalls, M. A. *et al.* Identification of novel risk loci, causal insights, and heritable risk for Parkinson's disease: a meta-analysis of genome-wide association studies. *Lancet Neurol.* **18**, 1091–1102 (2019).
2. Iwaki, H. *et al.* Genomewide association study of Parkinson's disease clinical biomarkers in 12 longitudinal patients' cohorts. *Mov. Disord.* 1–12 (2019) doi:10.1002/mds.27845.
3. Mitchell, R. E. *et al.* Strategies to investigate and mitigate collider bias in genetic and Mendelian randomisation studies of disease progression. *PLoS Genet.* **19**, 1–24 (2023).
4. Mahmoud, O., Dudbridge, F., Davey Smith, G., Munafo, M. & Tilling, K. A robust method for collider bias correction in conditional genome-wide association studies. *Nat. Commun.* **13**, 1–13 (2022).
5. Van Der Harst, P. & Verweij, N. Identification of 64 novel genetic loci provides an expanded view on the genetic architecture of coronary artery disease. *Circ. Res.* **122**, 433–443 (2018).
6. Matsunaga, H. *et al.* Transethnic Meta-Analysis of Genome-Wide Association Studies Identifies Three New Loci and Characterizes Population-Specific Differences for Coronary Artery Disease. *Circ. Genomic Precis. Med.* 128–138 (2020) doi:10.1161/CIRCGEN.119.002670.
7. Koyama, S. *et al.* Population-specific and trans-ancestry genome-wide analyses identify distinct and shared genetic risk loci for coronary artery disease. *Nat. Genet.* **52**, 1169–1177 (2020).
8. Shadrina, A. S. *et al.* Prioritization of causal genes for coronary artery disease based on cumulative evidence from experimental and in silico studies. *Sci. Rep.* **10**, 1–15 (2020).
9. Timmers, P. R. H. J., Wilson, J. F., Joshi, P. K. & Deelen, J. Multivariate genomic scan implicates novel loci and haem metabolism in human ageing. *Nat. Commun.* **11**, 1–10 (2020).
10. Ben-Shlomo, Y. & Marmot, M. G. Survival and cause of death in a cohort of patients with parkinsonism: Possible clues to aetiology? *J. Neurol. Neurosurg. Psychiatry* **58**, 293–299 (1995).
11. Cao, P., Maximov, A. & Südhof, T. C. Activity-dependent IGF-1 exocytosis is controlled by the Ca<sup>2+</sup>-sensor synaptotagmin-10. *Cell* **145**, 300–311 (2011).
12. Castilla-Cortázar, I., Aguirre, G. A., Femat-Roldán, G., Martín-Estal, I. & Espinosa, L. Is insulin-like growth factor-1 involved in Parkinson's disease development? *J. Transl. Med.* **18**, 1–17 (2020).
13. Pristerà, A. *et al.* Dopamine neuron-derived IGF-1 controls dopamine neuron firing, skill learning, and exploration. *Proc. Natl. Acad. Sci. U. S. A.* **116**, 3817–3826 (2019).
14. Lomelino, C. L., Andring, J. T., McKenna, R. & Kilberg, M. S. Asparagine synthetase: Function, structure, and role in disease. *J. Biol. Chem.* **292**, 19952–19958 (2017).
15. Granzotto, A., Canzoniero, L. M. T. & Sensi, S. L. A Neurotoxic Ménage-à-trois: Glutamate, Calcium, and Zinc in the Excitotoxic Cascade. *Front. Mol. Neurosci.* **13**,

- 1–13 (2020).
16. Mehta, A., Prabhakar, M., Kumar, P., Deshmukh, R. & Sharma, P. L. Excitotoxicity: Bridge to various triggers in neurodegenerative disorders. *Eur. J. Pharmacol.* **698**, 6–18 (2013).
  17. Zhang, Q. *et al.* L-Asparaginase Exerts Neuroprotective Effects in an SH-SY5Y-A53T Model of Parkinson's Disease by Regulating Glutamine Metabolism. *Front. Mol. Neurosci.* **13**, 1–15 (2020).
  18. Erro, R., Mencacci, N. E. & Bhatia, K. P. The Emerging Role of Phosphodiesterases in Movement Disorders. *Mov. Disord.* **36**, 2225–2243 (2021).
  19. Tozzi, A. *et al.* Mechanisms underlying altered striatal synaptic plasticity in old A53T- $\alpha$  synuclein overexpressing mice. *Neurobiol. Aging* **33**, 1792–1799 (2012).
  20. Giorgi, M. *et al.* Lowered cAMP and cGMP signalling in the brain during levodopa-induced dyskinesias in hemiparkinsonian rats: New aspects in the pathogenetic mechanisms. *Eur. J. Neurosci.* **28**, 941–950 (2008).
  21. Kelly, M. P. Cyclic nucleotide signaling changes associated with normal aging and age-related diseases of the brain. *Cell. Signal.* **42**, 281–291 (2018).
  22. Young, M. J., Hsu, K. C., Lin, T. E., Chang, W. C. & Hung, J. J. The role of ubiquitin-specific peptidases in cancer progression. *J. Biomed. Sci.* **26**, 1–14 (2019).
  23. Yao, Y. *et al.* USP53 plays an antitumor role in hepatocellular carcinoma through deubiquitination of cytochrome c. *Oncogenesis* **11**, 1–12 (2022).
  24. Cheng, W. *et al.* USP53 activated by H3K27 acetylation regulates cell viability, apoptosis and metabolism in esophageal carcinoma via the AMPK signaling pathway. *Carcinogenesis* **43**, 349–359 (2022).
  25. Xu, D., Farmer, A., Collett, G., Grishin, N. V. & Chook, Y. M. Sequence and structural analyses of nuclear export signals in the NESdb database. *Mol. Biol. Cell* **23**, 3677–3693 (2012).
  26. Azmi, A. S., Uddin, M. H. & Mohammad, R. M. The nuclear export protein XPO1 — from biology to targeted therapy. *Nat. Rev. Clin. Oncol.* **18**, 152–169 (2021).
  27. Liu, S. *et al.* The XPO1 Inhibitor KPT-8602 Ameliorates Parkinson's Disease by Inhibiting the NF- $\kappa$ B/NLRP3 Pathway. *Front. Pharmacol.* **13**, 1–14 (2022).
  28. Lui, T. T. H. *et al.* The Ubiquitin-Specific Protease USP34 Regulates Axin Stability and Wnt/ $\beta$ -Catenin Signaling. *Mol. Cell. Biol.* **31**, 2053–2065 (2011).
  29. Pascual, V. *et al.* Different gene expression signatures in children and adults with celiac disease. *PLoS One* **11**, 1–10 (2016).
  30. Gabrielsen, I. S. M. *et al.* Genetic risk variants for autoimmune diseases that influence gene expression in thymus. *Hum. Mol. Genet.* **25**, 3117–3124 (2016).
